# Supplementary material
Source: publisher figshare collection journal article supplement (https://acs.figshare.com/ndownloader/files/7323587)
Supplement: Supplementary file 1 [file 7323587]

data_r90428f
_audit_creation_date              2016-03-07
_audit_creation_method
;
Olex2 1.2
(compiled 2016.02.19 svn.r3266 for OlexSys, GUI svn.r5155)
;
_publ_contact_author_address      ?
_publ_contact_author_email        ?
_publ_contact_author_name         ''
_publ_contact_author_phone        ?
_publ_section_references
;
Dolomanov, O.V., Bourhis, L.J., Gildea, R.J, Howard, J.A.K. & Puschmann, H.
 (2009), J. Appl. Cryst. 42, 339-341.

Sheldrick, G.M. (2015). Acta Cryst. C71, 3-8.
;
_chemical_name_common             ?
_chemical_name_systematic
;
 ? 
;
_chemical_formula_moiety          'C87 H90 N12 O12, 5(C H2 Cl2)'
_chemical_formula_sum             'C92 H100 Cl10 N12 O12'
_chemical_formula_weight          1920.33
_chemical_melting_point           ?
loop_
  _atom_type_symbol
  _atom_type_description
  _atom_type_scat_dispersion_real
  _atom_type_scat_dispersion_imag
  _atom_type_scat_source
 'C' 'C' 0.0033 0.0016 'International Tables Vol C Tables 4.2.6.8 and 6.1.1.4'
 'H' 'H' 0.0000 0.0000 'International Tables Vol C Tables 4.2.6.8 and 6.1.1.4'
 'N' 'N' 0.0061 0.0033 'International Tables Vol C Tables 4.2.6.8 and 6.1.1.4'
 'O' 'O' 0.0106 0.0060 'International Tables Vol C Tables 4.2.6.8 and 6.1.1.4'
 'Cl' 'Cl' 0.1484 0.1585 'International Tables Vol C Tables 4.2.6.8 and 6.1.1.4'

_shelx_space_group_comment
;
The symmetry employed for this shelxl refinement is uniquely defined
by the following loop, which should always be used as a source of
symmetry information in preference to the above space-group names.
They are only intended as comments.
;
_space_group_crystal_system       'monoclinic'
_space_group_IT_number            14
_space_group_name_H-M_alt         'P 1 21/c 1'
_space_group_name_Hall            '-P 2ybc'
loop_
  _space_group_symop_operation_xyz
 'x, y, z'
 '-x, y+1/2, -z+1/2'
 '-x, -y, -z'
 'x, -y-1/2, z-1/2'

_cell_length_a                    18.036(4)
_cell_length_b                    14.730(3)
_cell_length_c                    39.096(8)
_cell_angle_alpha                 90
_cell_angle_beta                  98.71(3)
_cell_angle_gamma                 90
_cell_volume                      10267(4)
_cell_formula_units_Z             4
_cell_measurement_reflns_used     16720
_cell_measurement_temperature     113(2)
_cell_measurement_theta_max       27.0
_cell_measurement_theta_min       1.7
_shelx_estimated_absorpt_T_max    0.987
_shelx_estimated_absorpt_T_min    0.961
_exptl_absorpt_coefficient_mu     0.332
_exptl_absorpt_correction_T_max   0.9868
_exptl_absorpt_correction_T_min   0.9612
_exptl_absorpt_correction_type    'multi-scan'
_exptl_absorpt_process_details    CrystalClear
_exptl_absorpt_special_details    ?
_exptl_crystal_colour             colorless
_exptl_crystal_density_diffrn     1.242
_exptl_crystal_density_meas       ?
_exptl_crystal_density_method     'not measured'
_exptl_crystal_description        block
_exptl_crystal_F_000              4008
_exptl_crystal_size_max           0.12
_exptl_crystal_size_mid           0.08
_exptl_crystal_size_min           0.04
_exptl_special_details
;
 ? 
;
_exptl_transmission_factor_max    ?
_exptl_transmission_factor_min    ?
_diffrn_reflns_av_R_equivalents   0.0505
_diffrn_reflns_av_unetI/netI      0.0531
_diffrn_reflns_Laue_measured_fraction_full 0.989
_diffrn_reflns_Laue_measured_fraction_max 0.989
_diffrn_reflns_limit_h_max        21
_diffrn_reflns_limit_h_min        -21
_diffrn_reflns_limit_k_max        17
_diffrn_reflns_limit_k_min        -17
_diffrn_reflns_limit_l_max        46
_diffrn_reflns_limit_l_min        -46
_diffrn_reflns_number             68071
_diffrn_reflns_point_group_measured_fraction_full 0.989
_diffrn_reflns_point_group_measured_fraction_max 0.989
_diffrn_reflns_theta_full         25.010
_diffrn_reflns_theta_max          25.010
_diffrn_reflns_theta_min          1.479
_diffrn_ambient_temperature       113.15
_diffrn_detector_area_resol_mean  7.31
_diffrn_measured_fraction_theta_full 0.989
_diffrn_measured_fraction_theta_max 0.989
_diffrn_measurement_device_type   'Bruker P4'
_diffrn_measurement_method        '\w scans'
_diffrn_radiation_monochromator   'graphite'
_diffrn_radiation_type            MoK\a
_diffrn_radiation_wavelength      0.71073
_diffrn_source                    ?
_reflns_Friedel_coverage          0.000
_reflns_Friedel_fraction_full     .
_reflns_Friedel_fraction_max      .
_reflns_number_gt                 14405
_reflns_number_total              17915
_reflns_special_details
;
 Reflections were merged by SHELXL according to the crystal
 class for the calculation of statistics and refinement.
 
 _reflns_Friedel_fraction is defined as the number of unique
 Friedel pairs measured divided by the number that would be
 possible theoretically, ignoring centric projections and
 systematic absences.
;
_reflns_threshold_expression      'I > 2\s(I)'
_computing_cell_refinement        CrystalClear
_computing_data_collection        'CrystalClear(Rigaku/MSC Inc., 2005)'
_computing_data_reduction         CrystalClear
_computing_molecular_graphics     'Olex2 (Dolomanov et al., 2009)'
_computing_publication_material   'Olex2 (Dolomanov et al., 2009)'
_computing_structure_refinement   'ShelXL (Sheldrick, 2015)'
_computing_structure_solution     'SHELXS-97 (Sheldrick, 1990)'
_refine_diff_density_max          1.031
_refine_diff_density_min          -0.798
_refine_diff_density_rms          0.087
_refine_ls_extinction_coef        0.0084(9)
_refine_ls_extinction_expression  'Fc^*^=kFc[1+0.001xFc^2^\l^3^/sin(2\q)]^-1/4^'
_refine_ls_extinction_method      'SHELXL-2014/7 (Sheldrick 2014'
_refine_ls_goodness_of_fit_ref    2.013
_refine_ls_hydrogen_treatment     constr
_refine_ls_matrix_type            full
_refine_ls_number_parameters      1236
_refine_ls_number_reflns          17915
_refine_ls_number_restraints      293
_refine_ls_R_factor_all           0.1292
_refine_ls_R_factor_gt            0.1145
_refine_ls_restrained_S_all       2.034
_refine_ls_shift/su_max           0.004
_refine_ls_shift/su_mean          0.000
_refine_ls_structure_factor_coef  Fsqd
_refine_ls_weighting_details
'w=1/[\s^2^(Fo^2^)+(0.1000P)^2^] where P=(Fo^2^+2Fc^2^)/3'
_refine_ls_weighting_scheme       calc
_refine_ls_wR_factor_gt           0.3043
_refine_ls_wR_factor_ref          0.3151
_refine_special_details           ?
_olex2_refinement_description
;
1. Fixed Uiso
 At 1.2 times of:
  All C(H) groups, All C(H,H) groups
2. Restrained distances
 Cl3-Cl4 = Cl3'-Cl4' = Cl9-Cl10 = Cl11-Cl12
 2.8 with sigma of 0.01
 C96-Cl9 = C96-Cl10 = C97-Cl11 = C97-Cl12
 1.72 with sigma of 0.01
 C93-Cl3 = C93-Cl4 = C93'-Cl3' = C93'-Cl4'
 1.72 with sigma of 0.01
 C33'-C35' = C35'-C37'
 2.52 with sigma of 0.01
 C30'-C32' = C32'-C34' = C34'-C36' = C31'-C33'
 2.52 with sigma of 0.01
 C30-C32 = C32-C34 = C34-C36 = C31-C33 = C33-C35 = C35-C37
 2.52 with sigma of 0.01
 O3-C30 = O3-C30' = O4-C37 = O4-C37'
 1.42 with sigma of 0.01
 C35'-C36' = C36'-C37'
 1.54 with sigma of 0.01
 C30'-C31' = C31'-C32' = C32'-C33' = C33'-C34' = C34'-C35'
 1.54 with sigma of 0.01
 C30-C31 = C31-C32 = C32-C33 = C33-C34 = C34-C35 = C35-C36 = C36-C37
 1.54 with sigma of 0.01
 C8-C9 = C9-C10 = C10-C11 = C11-C12 = C12-C13 = C13-C14 = C14-C15
 1.54 with sigma of 0.01
 C8'-C9' = C9'-C10' = C10'-C11' = C11'-C12' = C12'-C13'
 1.54 with sigma of 0.01
 C8-C10 = C10-C12 = C12-C14 = C9-C11 = C11-C13 = C13-C15
 2.52 with sigma of 0.01
 C57-C56
 1.54 with sigma of 0.01
 C13'-C14' = C14'-C15'
 1.54 with sigma of 0.01
 C8'-C10' = C10'-C12' = C12'-C14' = C9'-C11' = C11'-C13' = C13'-C15'
 2.52 with sigma of 0.01
 O1-C8 = O1-C8' = O2-C15 = O2-C15'
 1.42 with sigma of 0.01
 C16-C15
 2.5 with sigma of 0.02
 C15'-C16
 2.5 with sigma of 0.02
3. Rigid bond restraints
 C17, C16
 with sigma for 1-2 distances of 0.01 and sigma for 1-3 distances of 0.01
 C4, C3
 with sigma for 1-2 distances of 0.01 and sigma for 1-3 distances of 0.01
4. Uiso/Uaniso restraints and constraints
C30 \\sim C31 \\sim C32 \\sim C33 \\sim C34 \\sim C35 \\sim C36 \\sim C37:
within 2A with sigma of 0.01 and sigma for terminal atoms of 0.02
C8 \\sim C9 \\sim C10 \\sim C11 \\sim C12 \\sim C13 \\sim C14 \\sim C15: within
2A with sigma of 0.01 and sigma for terminal atoms of 0.02
Uanis(C93) \\sim Ueq, Uanis(Cl3) \\sim Ueq, Uanis(Cl4) \\sim Ueq, Uanis(C93')
\\sim Ueq, Uanis(Cl3') \\sim Ueq, Uanis(Cl4') \\sim Ueq: with sigma of 0.01 and
sigma for terminal atoms of 0.02
Uanis(C30) \\sim Ueq, Uanis(C31) \\sim Ueq, Uanis(C32) \\sim Ueq, Uanis(C33)
\\sim Ueq, Uanis(C34) \\sim Ueq, Uanis(C35) \\sim Ueq, Uanis(C36) \\sim Ueq,
Uanis(C37) \\sim Ueq: with sigma of 0.01 and sigma for terminal atoms of 0.02
Uanis(C8) \\sim Ueq, Uanis(C9) \\sim Ueq, Uanis(C10) \\sim Ueq, Uanis(C11)
\\sim Ueq, Uanis(C12) \\sim Ueq, Uanis(C13) \\sim Ueq, Uanis(C14) \\sim Ueq,
Uanis(C15) \\sim Ueq: with sigma of 0.01 and sigma for terminal atoms of 0.02
Uanis(C37) = Uanis(C37')
Uanis(C36) = Uanis(C36')
Uanis(C35) = Uanis(C35')
Uanis(C34) = Uanis(C34')
Uanis(C33) = Uanis(C33')
Uanis(C32) = Uanis(C32')
Uanis(C31) = Uanis(C31')
Uanis(C30) = Uanis(C30')
Uanis(C14) = Uanis(C14')
Uanis(C13) = Uanis(C13')
Uanis(C12) = Uanis(C12')
Uanis(C11) = Uanis(C11')
Uanis(C10) = Uanis(C10')
Uanis(C9) = Uanis(C9')
Uanis(C8) = Uanis(C8')
Uanis(C93) = Uanis(C93')
5. Others
 Sof(Cl11)=Sof(Cl12)=Sof(C97)=Sof(H97A)=Sof(H97B)=1-FVAR(1)
 Sof(Cl9)=Sof(Cl10)=Sof(C96)=Sof(H96A)=Sof(H96B)=FVAR(1)
 Sof(C30')=Sof(H30C)=Sof(H30D)=Sof(C31')=Sof(H31C)=Sof(H31D)=Sof(C32')=
 Sof(H32C)=Sof(H32D)=Sof(C33')=Sof(H33C)=Sof(H33D)=Sof(C34')=Sof(H34C)=
 Sof(H34D)=Sof(C35')=Sof(H35C)=Sof(H35D)=Sof(C36')=Sof(H36C)=Sof(H36D)=
 Sof(C37')=Sof(H37C)=Sof(H37D)=1-FVAR(2)
 Sof(C30)=Sof(H30A)=Sof(H30B)=Sof(C31)=Sof(H31A)=Sof(H31B)=Sof(C32)=Sof(H32A)=
 Sof(H32B)=Sof(C33)=Sof(H33A)=Sof(H33B)=Sof(C34)=Sof(H34A)=Sof(H34B)=Sof(C35)=
 Sof(H35A)=Sof(H35B)=Sof(C36)=Sof(H36A)=Sof(H36B)=Sof(C37)=Sof(H37A)=Sof(H37B)=
 FVAR(2)
 Sof(C8')=Sof(H8'A)=Sof(H8'B)=Sof(C9')=Sof(H9'A)=Sof(H9'B)=Sof(C10')=Sof(H10C)=
 Sof(H10D)=Sof(C11')=Sof(H11C)=Sof(H11D)=Sof(C12')=Sof(H12C)=Sof(H12D)=
 Sof(C13')=Sof(H13C)=Sof(H13D)=Sof(C14')=Sof(H14C)=Sof(H14D)=Sof(C15')=
 Sof(H15C)=Sof(H15D)=1-FVAR(3)
 Sof(C8)=Sof(H8A)=Sof(H8B)=Sof(C9)=Sof(H9A)=Sof(H9B)=Sof(C10)=Sof(H10A)=
 Sof(H10B)=Sof(C11)=Sof(H11A)=Sof(H11B)=Sof(C12)=Sof(H12A)=Sof(H12B)=Sof(C13)=
 Sof(H13A)=Sof(H13B)=Sof(C14)=Sof(H14A)=Sof(H14B)=Sof(C15)=Sof(H15A)=Sof(H15B)=
 FVAR(3)
 Sof(C93')=Sof(H93C)=Sof(H93D)=Sof(Cl3')=Sof(Cl4')=1-FVAR(4)
 Sof(C93)=Sof(H93A)=Sof(H93B)=Sof(Cl3)=Sof(Cl4)=FVAR(4)
 Fixed Uiso: C15'(0.1)
6.a Secondary CH2 refined with riding coordinates:
 C1(H1A,H1B), C8(H8A,H8B), C9(H9A,H9B), C10(H10A,H10B), C11(H11A,H11B),
 C12(H12A,H12B), C13(H13A,H13B), C14(H14A,H14B), C15(H15A,H15B), C8'(H8'A,H8'B),
  C9'(H9'A,H9'B), C10'(H10C,H10D), C11'(H11C,H11D), C12'(H12C,H12D), C13'(H13C,
 H13D), C14'(H14C,H14D), C15'(H15C,H15D), C22(H22A,H22B), C23(H23A,H23B),
 C30(H30A,H30B), C31(H31A,H31B), C32(H32A,H32B), C33(H33A,H33B), C34(H34A,H34B),
  C35(H35A,H35B), C36(H36A,H36B), C37(H37A,H37B), C30'(H30C,H30D), C31'(H31C,
 H31D), C32'(H32C,H32D), C33'(H33C,H33D), C34'(H34C,H34D), C35'(H35C,H35D),
 C36'(H36C,H36D), C37'(H37C,H37D), C44(H44A,H44B), C45(H45A,H45B), C52(H52A,
 H52B), C53(H53A,H53B), C54(H54A,H54B), C55(H55A,H55B), C56(H56A,H56B),
 C57(H57A,H57B), C58(H58A,H58B), C59(H59A,H59B), C66(H66A,H66B), C92(H92A,H92B),
  C93(H93A,H93B), C93'(H93C,H93D), C94(H94A,H94B), C95(H95A,H95B), C96(H96A,
 H96B), C97(H97A,H97B)
6.b Aromatic/amide H refined with riding coordinates:
 C3(H3), C4(H4), C6(H6), C7(H7), C17(H17), C18(H18), C20(H20), C21(H21),
 C25(H25), C26(H26), C28(H28), C29(H29), C39(H39), C40(H40), C42(H42), C43(H43),
  C47(H47), C48(H48), C50(H50), C51(H51), C61(H61), C62(H62), C64(H64),
 C65(H65), C81(H81), C83(H83), C85(H85), C87(H87), C89(H89), C91(H91)
;
_atom_sites_solution_hydrogens    geom
_atom_sites_solution_primary      ?
_atom_sites_solution_secondary    ?
loop_
  _atom_site_label
  _atom_site_type_symbol
  _atom_site_fract_x
  _atom_site_fract_y
  _atom_site_fract_z
  _atom_site_U_iso_or_equiv
  _atom_site_adp_type
  _atom_site_occupancy
  _atom_site_site_symmetry_order
  _atom_site_calc_flag
  _atom_site_refinement_flags_posn
  _atom_site_refinement_flags_adp
  _atom_site_refinement_flags_occupancy
  _atom_site_disorder_assembly
  _atom_site_disorder_group
 N1 N 0.54425(17) 0.7883(2) 0.47761(9) 0.0500(8) Uani 1 1 d . . . . .
 N2 N 0.11846(17) 0.2412(2) 0.45885(9) 0.0435(7) Uani 1 1 d . . . . .
 N3 N 0.1184(2) 0.8215(3) 0.67507(10) 0.0631(10) Uani 1 1 d . . . . .
 N4 N 0.49881(17) 0.7103(2) 0.52186(9) 0.0474(8) Uani 1 1 d . . . . .
 N5 N 0.41603(17) 0.7877(2) 0.47698(9) 0.0479(8) Uani 1 1 d . . . . .
 N6 N 0.36573(17) 0.6990(2) 0.51917(9) 0.0444(8) Uani 1 1 d . . . . .
 N7 N 0.19717(16) 0.3085(2) 0.50446(9) 0.0443(8) Uani 1 1 d . . . . .
 N8 N 0.11093(17) 0.3979(2) 0.46495(9) 0.0449(8) Uani 1 1 d . . . . .
 N9 N 0.19227(16) 0.4690(2) 0.51141(9) 0.0433(7) Uani 1 1 d . . . . .
 N10 N 0.18874(19) 0.7068(3) 0.65572(9) 0.0539(9) Uani 1 1 d . . . . .
 N11 N 0.11671(19) 0.8087(3) 0.61515(9) 0.0545(9) Uani 1 1 d . . . . .
 N12 N 0.18968(17) 0.6922(2) 0.59446(9) 0.0465(8) Uani 1 1 d . . . . .
 O1 O 0.4772(3) 0.5539(4) 0.34091(13) 0.1147(17) Uani 1 1 d D . . . .
 O2 O 0.1803(3) 0.2581(4) 0.30132(12) 0.1145(17) Uani 1 1 d D . . . .
 O3 O -0.04150(16) 0.0283(2) 0.57226(8) 0.0556(7) Uani 1 1 d D . . . .
 O4 O 0.0163(4) 0.4601(4) 0.75068(16) 0.1239(19) Uani 1 1 d D . . . .
 O5 O 0.3042(3) 1.1754(4) 0.72326(12) 0.0975(13) Uani 1 1 d . . . . .
 O6 O 0.72571(18) 0.9959(2) 0.60916(9) 0.0668(9) Uani 1 1 d . . . . .
 O7 O 0.29142(13) 0.78170(19) 0.47694(7) 0.0476(7) Uani 1 1 d . . . . .
 O8 O 0.10425(14) 0.54884(19) 0.47332(8) 0.0500(7) Uani 1 1 d . . . . .
 O9 O 0.11545(14) 0.7899(2) 0.55819(7) 0.0494(7) Uani 1 1 d . . . . .
 O10 O 0.44991(13) 0.62628(19) 0.56086(7) 0.0458(6) Uani 1 1 d . . . . .
 O11 O 0.27368(14) 0.37754(18) 0.54684(7) 0.0451(6) Uani 1 1 d . . . . .
 O12 O 0.26152(15) 0.6027(2) 0.63528(7) 0.0522(7) Uani 1 1 d . . . . .
 C1 C 0.5326(2) 0.8276(3) 0.44227(12) 0.0543(10) Uani 1 1 d . . . . .
 H1A H 0.5769 0.8645 0.4390 0.065 Uiso 1 1 calc R . . . .
 H1B H 0.4884 0.8681 0.4396 0.065 Uiso 1 1 calc R . . . .
 C2 C 0.5208(3) 0.7542(3) 0.41470(12) 0.0595(12) Uani 1 1 d . . . . .
 C3 C 0.5791(3) 0.7216(4) 0.39994(13) 0.0685(13) Uani 1 1 d . U . . .
 H3 H 0.6281 0.7454 0.4067 0.082 Uiso 1 1 calc R . . . .
 C4 C 0.5670(4) 0.6529(5) 0.37478(14) 0.0828(17) Uani 1 1 d . U . . .
 H4 H 0.6070 0.6303 0.3639 0.099 Uiso 1 1 calc R . . . .
 C5 C 0.4941(4) 0.6189(4) 0.36621(17) 0.0868(18) Uani 1 1 d . . . . .
 C6 C 0.4340(4) 0.6535(5) 0.38027(16) 0.0835(16) Uani 1 1 d . . . . .
 H6 H 0.3845 0.6315 0.3733 0.100 Uiso 1 1 calc R . . . .
 C7 C 0.4483(3) 0.7196(4) 0.40431(14) 0.0744(15) Uani 1 1 d . . . . .
 H7 H 0.4079 0.7436 0.4145 0.089 Uiso 1 1 calc R . . . .
 C8 C 0.5380(11) 0.5142(11) 0.3276(9) 0.134(3) Uani 0.652(9) 1 d D U P A 1
 H8A H 0.5763 0.4931 0.3468 0.161 Uiso 0.652(9) 1 calc R . P A 1
 H8B H 0.5615 0.5592 0.3138 0.161 Uiso 0.652(9) 1 calc R . P A 1
 C9 C 0.5071(11) 0.4325(10) 0.3044(5) 0.146(4) Uani 0.652(9) 1 d D U P A 1
 H9A H 0.4726 0.4545 0.2840 0.175 Uiso 0.652(9) 1 calc R . P A 1
 H9B H 0.5490 0.3998 0.2962 0.175 Uiso 0.652(9) 1 calc R . P A 1
 C10 C 0.4650(10) 0.3678(10) 0.3261(4) 0.159(4) Uani 0.652(9) 1 d D U P A 1
 H10A H 0.5005 0.3423 0.3455 0.191 Uiso 0.652(9) 1 calc R . P A 1
 H10B H 0.4257 0.4018 0.3359 0.191 Uiso 0.652(9) 1 calc R . P A 1
 C11 C 0.4292(11) 0.2910(11) 0.3028(4) 0.181(4) Uani 0.652(9) 1 d D U P A 1
 H11A H 0.4687 0.2553 0.2939 0.217 Uiso 0.652(9) 1 calc R . P A 1
 H11B H 0.3955 0.3167 0.2828 0.217 Uiso 0.652(9) 1 calc R . P A 1
 C12 C 0.3837(12) 0.2283(14) 0.3242(4) 0.210(5) Uani 0.652(9) 1 d D U P A 1
 H12A H 0.4178 0.1986 0.3431 0.252 Uiso 0.652(9) 1 calc R . P A 1
 H12B H 0.3463 0.2644 0.3344 0.252 Uiso 0.652(9) 1 calc R . P A 1
 C13 C 0.3440(9) 0.1562(12) 0.2992(5) 0.212(5) Uani 0.652(9) 1 d D U P A 1
 H13A H 0.3374 0.1799 0.2753 0.254 Uiso 0.652(9) 1 calc R . P A 1
 H13B H 0.3755 0.1010 0.3002 0.254 Uiso 0.652(9) 1 calc R . P A 1
 C14 C 0.2681(9) 0.1321(15) 0.3087(5) 0.223(6) Uani 0.652(9) 1 d D U P A 1
 H14A H 0.2667 0.1503 0.3330 0.268 Uiso 0.652(9) 1 calc R . P A 1
 H14B H 0.2613 0.0654 0.3072 0.268 Uiso 0.652(9) 1 calc R . P A 1
 C15 C 0.2033(11) 0.1778(13) 0.2854(5) 0.237(7) Uani 0.652(9) 1 d D U P A 1
 H15A H 0.2194 0.1936 0.2630 0.284 Uiso 0.652(9) 1 calc R . P A 1
 H15B H 0.1605 0.1352 0.2807 0.284 Uiso 0.652(9) 1 calc R . P A 1
 C8' C 0.5377(19) 0.518(2) 0.3261(17) 0.134(3) Uani 0.348(9) 1 d D . P A 2
 H8'A H 0.5746 0.4866 0.3436 0.161 Uiso 0.348(9) 1 calc R . P A 2
 H8'B H 0.5634 0.5647 0.3142 0.161 Uiso 0.348(9) 1 calc R . P A 2
 C9' C 0.494(2) 0.450(2) 0.3003(10) 0.146(4) Uani 0.348(9) 1 d D . P A 2
 H9'A H 0.4404 0.4664 0.2961 0.175 Uiso 0.348(9) 1 calc R . P A 2
 H9'B H 0.5136 0.4525 0.2780 0.175 Uiso 0.348(9) 1 calc R . P A 2
 C10' C 0.5028(15) 0.3534(16) 0.3148(8) 0.159(4) Uani 0.348(9) 1 d D . P A 2
 H10C H 0.5546 0.3449 0.3270 0.191 Uiso 0.348(9) 1 calc R . P A 2
 H10D H 0.4944 0.3093 0.2955 0.191 Uiso 0.348(9) 1 calc R . P A 2
 C11' C 0.4471(15) 0.334(2) 0.3399(6) 0.181(4) Uani 0.348(9) 1 d D . P A 2
 H11C H 0.4484 0.3847 0.3568 0.217 Uiso 0.348(9) 1 calc R . P A 2
 H11D H 0.4614 0.2777 0.3529 0.217 Uiso 0.348(9) 1 calc R . P A 2
 C12' C 0.3668(13) 0.3246(19) 0.3195(9) 0.210(5) Uani 0.348(9) 1 d D . P A 2
 H12C H 0.3317 0.3639 0.3300 0.252 Uiso 0.348(9) 1 calc R . P A 2
 H12D H 0.3663 0.3439 0.2953 0.252 Uiso 0.348(9) 1 calc R . P A 2
 C13' C 0.3419(16) 0.225(2) 0.3206(9) 0.212(5) Uani 0.348(9) 1 d D . P A 2
 H13C H 0.3081 0.2176 0.3381 0.254 Uiso 0.348(9) 1 calc R . P A 2
 H13D H 0.3862 0.1857 0.3271 0.254 Uiso 0.348(9) 1 calc R . P A 2
 C14' C 0.3004(13) 0.197(3) 0.2845(8) 0.223(6) Uani 0.348(9) 1 d D . P A 2
 H14C H 0.3062 0.2445 0.2672 0.268 Uiso 0.348(9) 1 calc R . P A 2
 H14D H 0.3216 0.1396 0.2770 0.268 Uiso 0.348(9) 1 calc R . P A 2
 C15' C 0.2167(10) 0.1840(12) 0.2874(5) 0.100 Uiso 0.348(9) 1 d D . P A 2
 H15C H 0.1894 0.1705 0.2641 0.120 Uiso 0.348(9) 1 calc R . P A 2
 H15D H 0.2120 0.1300 0.3021 0.120 Uiso 0.348(9) 1 calc R . P A 2
 C16 C 0.1528(3) 0.2464(5) 0.33270(15) 0.0818(16) Uani 1 1 d D U . . .
 C17 C 0.1238(4) 0.1655(5) 0.34360(14) 0.0840(16) Uani 1 1 d . U . . .
 H17 H 0.1259 0.1116 0.3304 0.101 Uiso 1 1 calc R . . . .
 C18 C 0.0909(3) 0.1640(4) 0.37483(13) 0.0658(13) Uani 1 1 d . . . . .
 H18 H 0.0691 0.1099 0.3820 0.079 Uiso 1 1 calc R . . . .
 C19 C 0.0913(2) 0.2422(3) 0.39439(11) 0.0530(10) Uani 1 1 d . . . . .
 C20 C 0.1221(3) 0.3204(4) 0.38217(13) 0.0676(13) Uani 1 1 d . . . . .
 H20 H 0.1221 0.3748 0.3952 0.081 Uiso 1 1 calc R . . . .
 C21 C 0.1526(3) 0.3219(5) 0.35182(15) 0.0851(17) Uani 1 1 d . . . . .
 H21 H 0.1735 0.3765 0.3445 0.102 Uiso 1 1 calc R . . . .
 C22 C 0.0596(2) 0.2432(3) 0.42834(11) 0.0478(9) Uani 1 1 d . . . . .
 H22A H 0.0289 0.2985 0.4293 0.057 Uiso 1 1 calc R . . . .
 H22B H 0.0264 0.1899 0.4291 0.057 Uiso 1 1 calc R . . . .
 C23 C 0.1403(2) 0.1510(3) 0.47359(11) 0.0463(9) Uani 1 1 d . . . . .
 H23A H 0.1937 0.1526 0.4843 0.056 Uiso 1 1 calc R . . . .
 H23B H 0.1351 0.1055 0.4547 0.056 Uiso 1 1 calc R . . . .
 C24 C 0.09244(19) 0.1217(3) 0.50087(11) 0.0431(9) Uani 1 1 d . . . . .
 C25 C 0.1030(2) 0.0373(3) 0.51690(11) 0.0464(9) Uani 1 1 d . . . . .
 H25 H 0.1411 -0.0017 0.5110 0.056 Uiso 1 1 calc R . . . .
 C26 C 0.0600(2) 0.0085(3) 0.54103(11) 0.0490(9) Uani 1 1 d . . . . .
 H26 H 0.0692 -0.0489 0.5519 0.059 Uiso 1 1 calc R . . . .
 C27 C 0.0022(2) 0.0647(3) 0.54947(11) 0.0479(9) Uani 1 1 d . . . . .
 C28 C -0.0085(2) 0.1498(3) 0.53437(11) 0.0462(9) Uani 1 1 d . . . . .
 H28 H -0.0465 0.1889 0.5404 0.055 Uiso 1 1 calc R . . . .
 C29 C 0.0363(2) 0.1777(3) 0.51051(11) 0.0453(9) Uani 1 1 d . . . . .
 H29 H 0.0288 0.2363 0.5004 0.054 Uiso 1 1 calc R . . . .
 C30 C -0.1037(6) 0.0798(14) 0.5798(3) 0.0659(14) Uani 0.737(7) 1 d D U P B 1
 H30A H -0.1423 0.0384 0.5866 0.079 Uiso 0.737(7) 1 calc R . P B 1
 H30B H -0.1263 0.1134 0.5589 0.079 Uiso 0.737(7) 1 calc R . P B 1
 C31 C -0.0790(6) 0.1475(8) 0.6095(2) 0.079(2) Uani 0.737(7) 1 d D U P B 1
 H31A H -0.0419 0.1904 0.6024 0.094 Uiso 0.737(7) 1 calc R . P B 1
 H31B H -0.1230 0.1830 0.6142 0.094 Uiso 0.737(7) 1 calc R . P B 1
 C32 C -0.0446(5) 0.0978(5) 0.64221(17) 0.085(2) Uani 0.737(7) 1 d D U P B 1
 H32A H 0.0027 0.0685 0.6381 0.102 Uiso 0.737(7) 1 calc R . P B 1
 H32B H -0.0794 0.0494 0.6473 0.102 Uiso 0.737(7) 1 calc R . P B 1
 C33 C -0.0279(6) 0.1604(8) 0.6737(2) 0.110(3) Uani 0.737(7) 1 d D U P B 1
 H33A H -0.0158 0.1240 0.6951 0.132 Uiso 0.737(7) 1 calc R . P B 1
 H33B H -0.0723 0.1985 0.6757 0.132 Uiso 0.737(7) 1 calc R . P B 1
 C34 C 0.0398(5) 0.2215(7) 0.6687(2) 0.104(3) Uani 0.737(7) 1 d D U P B 1
 H34A H 0.0233 0.2713 0.6523 0.125 Uiso 0.737(7) 1 calc R . P B 1
 H34B H 0.0784 0.1853 0.6592 0.125 Uiso 0.737(7) 1 calc R . P B 1
 C35 C 0.0728(6) 0.2610(7) 0.7051(3) 0.136(3) Uani 0.737(7) 1 d D U P B 1
 H35A H 0.0663 0.2169 0.7235 0.164 Uiso 0.737(7) 1 calc R . P B 1
 H35B H 0.1270 0.2737 0.7062 0.164 Uiso 0.737(7) 1 calc R . P B 1
 C36 C 0.0308(7) 0.3480(7) 0.7101(2) 0.130(3) Uani 0.737(7) 1 d D U P B 1
 H36A H -0.0237 0.3386 0.7031 0.157 Uiso 0.737(7) 1 calc R . P B 1
 H36B H 0.0474 0.3969 0.6957 0.157 Uiso 0.737(7) 1 calc R . P B 1
 C37 C 0.0473(7) 0.3750(7) 0.7491(2) 0.133(3) Uani 0.737(7) 1 d D U P B 1
 H37A H 0.0239 0.3313 0.7634 0.160 Uiso 0.737(7) 1 calc R . P B 1
 H37B H 0.1020 0.3767 0.7572 0.160 Uiso 0.737(7) 1 calc R . P B 1
 C30' C -0.0976(14) 0.083(4) 0.5842(10) 0.0659(14) Uani 0.263(7) 1 d D . P B 2
 H30C H -0.1286 0.0436 0.5971 0.079 Uiso 0.263(7) 1 calc R . P B 2
 H30D H -0.1307 0.1083 0.5641 0.079 Uiso 0.263(7) 1 calc R . P B 2
 C31' C -0.064(2) 0.161(2) 0.6079(7) 0.079(2) Uani 0.263(7) 1 d D . P B 2
 H31C H -0.0425 0.2070 0.5940 0.094 Uiso 0.263(7) 1 calc R . P B 2
 H31D H -0.1044 0.1898 0.6187 0.094 Uiso 0.263(7) 1 calc R . P B 2
 C32' C -0.0032(12) 0.1242(15) 0.6362(5) 0.085(2) Uani 0.263(7) 1 d D . P B 2
 H32C H 0.0465 0.1311 0.6287 0.102 Uiso 0.263(7) 1 calc R . P B 2
 H32D H -0.0117 0.0588 0.6398 0.102 Uiso 0.263(7) 1 calc R . P B 2
 C33' C -0.0041(15) 0.176(2) 0.6703(6) 0.110(3) Uani 0.263(7) 1 d D . P B 2
 H33C H -0.0071 0.1325 0.6894 0.132 Uiso 0.263(7) 1 calc R . P B 2
 H33D H -0.0484 0.2164 0.6682 0.132 Uiso 0.263(7) 1 calc R . P B 2
 C34' C 0.0686(12) 0.2323(18) 0.6781(7) 0.104(3) Uani 0.263(7) 1 d D . P B 2
 H34C H 0.1050 0.2007 0.6955 0.125 Uiso 0.263(7) 1 calc R . P B 2
 H34D H 0.0913 0.2393 0.6567 0.125 Uiso 0.263(7) 1 calc R . P B 2
 C35' C 0.0504(18) 0.3262(15) 0.6917(7) 0.136(3) Uani 0.263(7) 1 d D . P B 2
 H35C H 0.0178 0.3599 0.6734 0.164 Uiso 0.263(7) 1 calc R . P B 2
 H35D H 0.0974 0.3611 0.6980 0.164 Uiso 0.263(7) 1 calc R . P B 2
 C36' C 0.011(2) 0.3163(18) 0.7237(7) 0.130(3) Uani 0.263(7) 1 d D . P B 2
 H36C H 0.0478 0.3053 0.7447 0.157 Uiso 0.263(7) 1 calc R . P B 2
 H36D H -0.0247 0.2645 0.7207 0.157 Uiso 0.263(7) 1 calc R . P B 2
 C37' C -0.0326(11) 0.4059(17) 0.7277(6) 0.133(3) Uani 0.263(7) 1 d D . P B 2
 H37C H -0.0454 0.4366 0.7050 0.160 Uiso 0.263(7) 1 calc R . P B 2
 H37D H -0.0794 0.3937 0.7372 0.160 Uiso 0.263(7) 1 calc R . P B 2
 C38 C 0.0470(4) 0.5386(4) 0.74017(17) 0.0855(17) Uani 1 1 d . . . . .
 C39 C 0.1103(4) 0.5740(4) 0.76008(17) 0.0830(16) Uani 1 1 d . . . . .
 H39 H 0.1330 0.5437 0.7805 0.100 Uiso 1 1 calc R . . . .
 C40 C 0.1405(3) 0.6551(4) 0.74968(14) 0.0744(14) Uani 1 1 d . . . . .
 H40 H 0.1843 0.6792 0.7632 0.089 Uiso 1 1 calc R . . . .
 C41 C 0.1080(3) 0.7020(4) 0.71983(12) 0.0623(12) Uani 1 1 d . . . . .
 C42 C 0.0434(3) 0.6661(5) 0.70130(16) 0.0810(16) Uani 1 1 d . . . . .
 H42 H 0.0194 0.6970 0.6813 0.097 Uiso 1 1 calc R . . . .
 C43 C 0.0128(4) 0.5851(5) 0.71136(18) 0.0896(18) Uani 1 1 d . . . . .
 H43 H -0.0318 0.5618 0.6983 0.107 Uiso 1 1 calc R . . . .
 C44 C 0.1447(3) 0.7883(4) 0.71045(12) 0.0646(12) Uani 1 1 d . . . . .
 H44A H 0.1357 0.8361 0.7271 0.077 Uiso 1 1 calc R . . . .
 H44B H 0.1995 0.7782 0.7130 0.077 Uiso 1 1 calc R . . . .
 C45 C 0.0842(3) 0.9117(4) 0.67177(14) 0.0673(13) Uani 1 1 d . . . . .
 H45A H 0.0428 0.9145 0.6857 0.081 Uiso 1 1 calc R . . . .
 H45B H 0.0629 0.9228 0.6473 0.081 Uiso 1 1 calc R . . . .
 C46 C 0.1409(3) 0.9842(4) 0.68383(13) 0.0675(13) Uani 1 1 d . . . . .
 C47 C 0.1414(3) 1.0304(4) 0.71542(15) 0.0784(15) Uani 1 1 d . . . . .
 H47 H 0.1028 1.0181 0.7288 0.094 Uiso 1 1 calc R . . . .
 C48 C 0.1959(4) 1.0926(5) 0.72760(17) 0.0898(18) Uani 1 1 d . . . . .
 H48 H 0.1939 1.1235 0.7488 0.108 Uiso 1 1 calc R . . . .
 C49 C 0.2532(3) 1.1100(5) 0.70910(16) 0.0814(16) Uani 1 1 d . . . . .
 C50 C 0.2547(3) 1.0683(4) 0.67711(17) 0.0806(16) Uani 1 1 d . . . . .
 H50 H 0.2931 1.0822 0.6638 0.097 Uiso 1 1 calc R . . . .
 C51 C 0.1973(3) 1.0044(4) 0.66493(15) 0.0703(13) Uani 1 1 d . . . . .
 H51 H 0.1980 0.9751 0.6433 0.084 Uiso 1 1 calc R . . . .
 C52 C 0.3628(4) 1.2019(5) 0.70420(19) 0.096(2) Uani 1 1 d . . . . .
 H52A H 0.3801 1.2636 0.7115 0.116 Uiso 1 1 calc R . . . .
 H52B H 0.3422 1.2044 0.6793 0.116 Uiso 1 1 calc R . . . .
 C53 C 0.4287(4) 1.1382(5) 0.70930(17) 0.0951(19) Uani 1 1 d . . . . .
 H53A H 0.4486 1.1340 0.7343 0.114 Uiso 1 1 calc R . . . .
 H53B H 0.4121 1.0769 0.7011 0.114 Uiso 1 1 calc R . . . .
 C54 C 0.4897(4) 1.1702(6) 0.68997(19) 0.102(2) Uani 1 1 d . . . . .
 H54A H 0.5011 1.2343 0.6963 0.123 Uiso 1 1 calc R . . . .
 H54B H 0.4701 1.1688 0.6649 0.123 Uiso 1 1 calc R . . . .
 C55 C 0.5622(4) 1.1172(6) 0.6959(2) 0.110(2) Uani 1 1 d . . . . .
 H55A H 0.5509 1.0515 0.6934 0.131 Uiso 1 1 calc R . . . .
 H55B H 0.5876 1.1278 0.7198 0.131 Uiso 1 1 calc R . . . .
 C56 C 0.6149(4) 1.1443(5) 0.6704(2) 0.108(2) Uani 1 1 d D . . . .
 H56A H 0.5872 1.1375 0.6467 0.129 Uiso 1 1 calc R . . . .
 H56B H 0.6269 1.2096 0.6739 0.129 Uiso 1 1 calc R . . . .
 C57 C 0.6878(4) 1.0932(6) 0.6723(2) 0.108(2) Uani 1 1 d D . . . .
 H57A H 0.7173 1.1011 0.6956 0.129 Uiso 1 1 calc R . . . .
 H57B H 0.6771 1.0277 0.6688 0.129 Uiso 1 1 calc R . . . .
 C58 C 0.7330(4) 1.1258(5) 0.64568(18) 0.098(2) Uani 1 1 d . . . . .
 H58A H 0.7857 1.1071 0.6529 0.117 Uiso 1 1 calc R . . . .
 H58B H 0.7318 1.1930 0.6455 0.117 Uiso 1 1 calc R . . . .
 C59 C 0.7078(3) 1.0920(4) 0.60837(16) 0.0768(15) Uani 1 1 d . . . . .
 H59A H 0.6533 1.1016 0.6014 0.092 Uiso 1 1 calc R . . . .
 H59B H 0.7351 1.1244 0.5919 0.092 Uiso 1 1 calc R . . . .
 C60 C 0.6994(2) 0.9466(3) 0.58037(12) 0.0574(11) Uani 1 1 d . . . . .
 C61 C 0.7114(2) 0.8519(3) 0.58311(13) 0.0571(11) Uani 1 1 d . . . . .
 H61 H 0.7369 0.8266 0.6040 0.069 Uiso 1 1 calc R . . . .
 C62 C 0.6859(2) 0.7964(3) 0.55548(12) 0.0533(10) Uani 1 1 d . . . . .
 H62 H 0.6942 0.7329 0.5577 0.064 Uiso 1 1 calc R . . . .
 C63 C 0.6485(2) 0.8303(3) 0.52459(12) 0.0506(10) Uani 1 1 d . . . . .
 C64 C 0.6374(3) 0.9241(3) 0.52211(13) 0.0604(12) Uani 1 1 d . . . . .
 H64 H 0.6119 0.9488 0.5011 0.072 Uiso 1 1 calc R . . . .
 C65 C 0.6625(3) 0.9823(3) 0.54938(13) 0.0606(12) Uani 1 1 d . . . . .
 H65 H 0.6545 1.0459 0.5469 0.073 Uiso 1 1 calc R . . . .
 C66 C 0.6218(2) 0.7670(3) 0.49422(12) 0.0526(10) Uani 1 1 d . . . . .
 H66A H 0.6562 0.7724 0.4768 0.063 Uiso 1 1 calc R . . . .
 H66B H 0.6238 0.7034 0.5026 0.063 Uiso 1 1 calc R . . . .
 C71 C 0.4850(2) 0.7621(3) 0.49227(11) 0.0473(9) Uani 1 1 d . . . . .
 C72 C 0.3613(2) 0.7541(3) 0.49195(10) 0.0442(9) Uani 1 1 d . . . . .
 C73 C 0.4375(2) 0.6819(3) 0.53244(10) 0.0418(8) Uani 1 1 d . . . . .
 C74 C 0.1426(2) 0.3175(3) 0.47606(10) 0.0441(9) Uani 1 1 d . . . . .
 C75 C 0.1383(2) 0.4680(3) 0.48396(11) 0.0457(9) Uani 1 1 d . . . . .
 C76 C 0.21816(19) 0.3860(3) 0.51947(10) 0.0409(8) Uani 1 1 d . . . . .
 C77 C 0.1412(2) 0.7775(3) 0.64799(12) 0.0555(11) Uani 1 1 d . . . . .
 C78 C 0.1423(2) 0.7615(3) 0.59121(11) 0.0487(10) Uani 1 1 d . . . . .
 C79 C 0.2107(2) 0.6703(3) 0.62750(11) 0.0498(10) Uani 1 1 d . . . . .
 C80 C 0.2306(2) 0.7430(3) 0.49070(11) 0.0438(9) Uani 1 1 d . . . . .
 C81 C 0.1985(2) 0.6648(3) 0.47502(11) 0.0448(9) Uani 1 1 d . . . . .
 H81 H 0.2165 0.6378 0.4558 0.054 Uiso 1 1 calc R . . . .
 C82 C 0.1382(2) 0.6282(3) 0.48910(11) 0.0447(9) Uani 1 1 d . . . . .
 C83 C 0.10958(19) 0.6678(3) 0.51631(10) 0.0439(9) Uani 1 1 d . . . . .
 H83 H 0.0676 0.6423 0.5249 0.053 Uiso 1 1 calc R . . . .
 C84 C 0.1440(2) 0.7462(3) 0.53087(11) 0.0456(9) Uani 1 1 d . . . . .
 C85 C 0.2049(2) 0.7854(3) 0.51842(10) 0.0433(9) Uani 1 1 d . . . . .
 H85 H 0.2279 0.8391 0.5285 0.052 Uiso 1 1 calc R . . . .
 C86 C 0.38671(19) 0.5815(3) 0.57031(10) 0.0427(9) Uani 1 1 d . . . . .
 C87 C 0.36190(19) 0.5023(3) 0.55298(10) 0.0417(8) Uani 1 1 d . . . . .
 H87 H 0.3853 0.4790 0.5346 0.050 Uiso 1 1 calc R . . . .
 C88 C 0.3008(2) 0.4587(3) 0.56388(10) 0.0424(9) Uani 1 1 d . . . . .
 C89 C 0.2672(2) 0.4904(3) 0.59093(10) 0.0452(9) Uani 1 1 d . . . . .
 H89 H 0.2263 0.4591 0.5982 0.054 Uiso 1 1 calc R . . . .
 C90 C 0.2948(2) 0.5682(3) 0.60695(10) 0.0462(9) Uani 1 1 d . . . . .
 C91 C 0.3549(2) 0.6165(3) 0.59747(10) 0.0444(9) Uani 1 1 d . . . . .
 H91 H 0.3730 0.6706 0.6091 0.053 Uiso 1 1 calc R . . . .
 C92 C 0.8013(3) 0.8278(4) 0.42075(14) 0.0681(13) Uani 1 1 d . . . . .
 H92A H 0.8508 0.8567 0.4207 0.082 Uiso 1 1 calc R . . . .
 H92B H 0.8041 0.7912 0.4421 0.082 Uiso 1 1 calc R . . . .
 Cl1 Cl 0.73215(7) 0.91401(10) 0.42116(4) 0.0735(4) Uani 1 1 d . . . . .
 Cl2 Cl 0.78233(7) 0.75560(9) 0.38476(3) 0.0695(4) Uani 1 1 d . . . . .
 C93 C 0.7750(7) 0.5029(8) 0.2998(4) 0.089(2) Uani 0.696(13) 1 d D U P C 1
 H93A H 0.7987 0.4590 0.3173 0.107 Uiso 0.696(13) 1 calc R . P C 1
 H93B H 0.8115 0.5170 0.2840 0.107 Uiso 0.696(13) 1 calc R . P C 1
 Cl3 Cl 0.7537(4) 0.6004(4) 0.32018(15) 0.1010(16) Uani 0.696(13) 1 d D U P C
 1
 Cl4 Cl 0.69491(17) 0.4534(4) 0.27599(10) 0.1148(19) Uani 0.696(13) 1 d D U P
 C 1
 C93' C 0.7645(18) 0.5065(18) 0.2937(9) 0.089(2) Uani 0.304(13) 1 d D U P C 2
 H93C H 0.7570 0.4555 0.3093 0.107 Uiso 0.304(13) 1 calc R . P C 2
 H93D H 0.8100 0.4941 0.2832 0.107 Uiso 0.304(13) 1 calc R . P C 2
 Cl3' Cl 0.7751(10) 0.6058(14) 0.3167(5) 0.129(6) Uani 0.304(13) 1 d D U P C 2
 Cl4' Cl 0.6874(8) 0.5166(13) 0.2617(4) 0.177(6) Uani 0.304(13) 1 d D U P C 2
 C94 C 0.0583(3) 0.4948(3) 0.57644(13) 0.0605(11) Uani 1 1 d . . . . .
 H94A H 0.1008 0.5256 0.5680 0.073 Uiso 1 1 calc R . . . .
 H94B H 0.0113 0.5207 0.5638 0.073 Uiso 1 1 calc R . . . .
 Cl5 Cl 0.06161(7) 0.37738(9) 0.56691(5) 0.0820(5) Uani 1 1 d . . . . .
 Cl6 Cl 0.06222(9) 0.51711(14) 0.62108(4) 0.0950(5) Uani 1 1 d . . . . .
 C95 C 0.4957(4) 0.8866(5) 0.58451(19) 0.0951(19) Uani 1 1 d . . . . .
 H95A H 0.5364 0.8799 0.5703 0.114 Uiso 1 1 calc R . . . .
 H95B H 0.4900 0.8277 0.5960 0.114 Uiso 1 1 calc R . . . .
 Cl7 Cl 0.41360(12) 0.91144(14) 0.55776(6) 0.1140(7) Uani 1 1 d . . . . .
 Cl8 Cl 0.52178(11) 0.96943(16) 0.61627(5) 0.1124(7) Uani 1 1 d . . . . .
 Cl9 Cl 0.4354(2) 0.53162(18) 0.46715(8) 0.0893(13) Uani 0.545(6) 1 d D . P D
 1
 Cl10 Cl 0.29565(16) 0.4663(2) 0.43021(17) 0.130(3) Uani 0.545(6) 1 d D . P D
 1
 C96 C 0.3926(5) 0.462(2) 0.4344(6) 0.066(4) Uani 0.545(6) 1 d D . P D 1
 H96A H 0.4095 0.3992 0.4391 0.079 Uiso 0.545(6) 1 calc R . P D 1
 H96B H 0.4083 0.4815 0.4122 0.079 Uiso 0.545(6) 1 calc R . P D 1
 Cl11 Cl 0.3551(6) 0.5115(5) 0.46103(11) 0.207(7) Uani 0.455(6) 1 d D . P D 2
 Cl12 Cl 0.3156(4) 0.4320(5) 0.39550(16) 0.173(4) Uani 0.455(6) 1 d D . P D 2
 C97 C 0.3879(8) 0.448(3) 0.4293(6) 0.071(7) Uani 0.455(6) 1 d D . P D 2
 H97A H 0.4298 0.4806 0.4209 0.085 Uiso 0.455(6) 1 calc R . P D 2
 H97B H 0.4066 0.3889 0.4388 0.085 Uiso 0.455(6) 1 calc R . P D 2

loop_
  _atom_site_aniso_label
  _atom_site_aniso_U_11
  _atom_site_aniso_U_22
  _atom_site_aniso_U_33
  _atom_site_aniso_U_23
  _atom_site_aniso_U_13
  _atom_site_aniso_U_12
 N1 0.0297(16) 0.052(2) 0.068(2) 0.0183(17) 0.0050(15) -0.0002(14)
 N2 0.0306(15) 0.0389(17) 0.0595(19) 0.0030(14) 0.0018(14) -0.0057(13)
 N3 0.057(2) 0.069(3) 0.063(2) -0.0022(19) 0.0090(18) 0.009(2)
 N4 0.0316(16) 0.0466(19) 0.063(2) 0.0096(16) 0.0043(14) -0.0004(14)
 N5 0.0320(16) 0.049(2) 0.062(2) 0.0128(16) 0.0030(15) 0.0007(14)
 N6 0.0287(15) 0.0421(18) 0.0610(19) 0.0091(15) 0.0022(14) 0.0005(13)
 N7 0.0284(15) 0.0414(18) 0.062(2) 0.0096(15) 0.0022(14) 0.0001(13)
 N8 0.0285(15) 0.0421(18) 0.062(2) 0.0046(15) 0.0000(14) -0.0030(13)
 N9 0.0288(15) 0.0395(18) 0.0590(19) 0.0093(14) -0.0019(14) 0.0008(13)
 N10 0.0409(18) 0.060(2) 0.060(2) 0.0011(17) 0.0061(16) 0.0048(16)
 N11 0.0378(18) 0.064(2) 0.061(2) -0.0020(18) 0.0062(16) 0.0054(16)
 N12 0.0343(16) 0.0475(19) 0.0556(19) 0.0050(15) 0.0002(14) 0.0044(14)
 O1 0.109(4) 0.121(4) 0.102(3) -0.022(3) -0.022(3) 0.023(3)
 O2 0.162(5) 0.106(4) 0.082(3) 0.005(2) 0.039(3) -0.002(3)
 O3 0.0460(16) 0.0514(17) 0.0712(19) 0.0077(14) 0.0149(14) -0.0073(13)
 O4 0.155(5) 0.077(3) 0.150(5) -0.008(3) 0.053(4) -0.025(3)
 O5 0.086(3) 0.102(3) 0.099(3) -0.004(3) -0.004(2) -0.013(3)
 O6 0.0557(19) 0.066(2) 0.077(2) -0.0028(17) 0.0048(16) -0.0092(16)
 O7 0.0274(12) 0.0493(16) 0.0650(17) 0.0199(13) 0.0037(12) 0.0007(11)
 O8 0.0311(13) 0.0386(15) 0.0749(18) 0.0051(13) -0.0088(13) 0.0012(11)
 O9 0.0358(14) 0.0545(17) 0.0576(16) 0.0070(13) 0.0063(12) 0.0110(12)
 O10 0.0263(12) 0.0490(16) 0.0589(16) 0.0121(12) -0.0035(11) -0.0045(11)
 O11 0.0320(13) 0.0390(14) 0.0606(16) 0.0087(12) -0.0047(12) 0.0024(11)
 O12 0.0416(15) 0.0593(18) 0.0549(16) 0.0091(13) 0.0046(12) 0.0086(13)
 C1 0.037(2) 0.055(3) 0.072(3) 0.018(2) 0.0089(19) -0.0019(18)
 C2 0.048(2) 0.062(3) 0.066(3) 0.024(2) 0.002(2) -0.002(2)
 C3 0.062(3) 0.076(3) 0.061(3) 0.010(2) -0.014(2) 0.005(3)
 C4 0.082(4) 0.099(4) 0.063(3) 0.018(3) -0.001(3) 0.033(3)
 C5 0.087(4) 0.074(4) 0.086(4) -0.005(3) -0.030(3) 0.009(3)
 C6 0.072(4) 0.093(4) 0.082(4) 0.008(3) 0.002(3) -0.001(3)
 C7 0.058(3) 0.098(4) 0.065(3) 0.003(3) 0.004(2) -0.015(3)
 C8 0.132(5) 0.123(5) 0.141(6) -0.016(5) 0.000(5) 0.043(5)
 C9 0.143(6) 0.138(6) 0.144(6) -0.036(5) -0.015(5) 0.023(5)
 C10 0.155(7) 0.151(6) 0.162(6) -0.023(6) -0.007(6) 0.015(6)
 C11 0.179(7) 0.180(7) 0.178(7) -0.019(6) 0.009(6) 0.015(6)
 C12 0.213(7) 0.201(7) 0.212(7) 0.000(6) 0.021(6) 0.001(6)
 C13 0.209(8) 0.208(8) 0.220(7) 0.007(6) 0.035(6) 0.003(6)
 C14 0.222(8) 0.222(8) 0.232(8) 0.004(6) 0.053(7) 0.012(7)
 C15 0.243(10) 0.236(10) 0.237(9) 0.002(8) 0.051(8) 0.014(8)
 C8' 0.132(5) 0.123(5) 0.141(6) -0.016(5) 0.000(5) 0.043(5)
 C9' 0.143(6) 0.138(6) 0.144(6) -0.036(5) -0.015(5) 0.023(5)
 C10' 0.155(7) 0.151(6) 0.162(6) -0.023(6) -0.007(6) 0.015(6)
 C11' 0.179(7) 0.180(7) 0.178(7) -0.019(6) 0.009(6) 0.015(6)
 C12' 0.213(7) 0.201(7) 0.212(7) 0.000(6) 0.021(6) 0.001(6)
 C13' 0.209(8) 0.208(8) 0.220(7) 0.007(6) 0.035(6) 0.003(6)
 C14' 0.222(8) 0.222(8) 0.232(8) 0.004(6) 0.053(7) 0.012(7)
 C16 0.060(3) 0.110(5) 0.078(3) 0.006(3) 0.019(3) -0.007(3)
 C17 0.091(4) 0.088(4) 0.068(3) -0.022(3) -0.004(3) 0.018(3)
 C18 0.050(3) 0.077(3) 0.069(3) -0.008(2) 0.006(2) 0.006(2)
 C19 0.0339(19) 0.061(3) 0.061(2) -0.002(2) -0.0029(18) 0.0050(18)
 C20 0.052(3) 0.080(3) 0.071(3) 0.008(3) 0.009(2) -0.016(2)
 C21 0.076(4) 0.109(5) 0.072(3) -0.004(3) 0.014(3) -0.019(3)
 C22 0.0329(19) 0.044(2) 0.065(2) 0.0047(18) 0.0048(18) 0.0031(16)
 C23 0.0298(18) 0.040(2) 0.068(2) 0.0013(18) 0.0041(17) 0.0018(15)
 C24 0.0261(17) 0.041(2) 0.059(2) 0.0022(17) -0.0037(16) -0.0055(15)
 C25 0.0292(18) 0.039(2) 0.068(3) 0.0000(18) -0.0009(17) -0.0004(15)
 C26 0.040(2) 0.042(2) 0.062(2) 0.0058(18) -0.0014(18) 0.0000(17)
 C27 0.0338(19) 0.043(2) 0.066(2) 0.0054(18) 0.0043(18) -0.0051(16)
 C28 0.0361(19) 0.037(2) 0.064(2) -0.0011(17) 0.0034(18) -0.0033(16)
 C29 0.0358(19) 0.036(2) 0.062(2) 0.0030(17) 0.0013(17) 0.0014(16)
 C30 0.059(3) 0.068(3) 0.076(4) 0.013(3) 0.026(3) 0.007(3)
 C31 0.080(5) 0.077(4) 0.082(3) 0.005(3) 0.024(3) 0.007(4)
 C32 0.089(4) 0.085(4) 0.084(4) 0.004(3) 0.025(4) 0.001(4)
 C33 0.105(5) 0.111(5) 0.113(4) 0.009(4) 0.011(4) -0.022(4)
 C34 0.094(5) 0.106(5) 0.108(5) 0.003(4) 0.003(4) -0.036(5)
 C35 0.140(6) 0.131(6) 0.134(6) 0.016(5) 0.009(5) -0.027(5)
 C36 0.136(6) 0.135(6) 0.122(6) 0.020(5) 0.024(5) -0.043(5)
 C37 0.147(6) 0.138(7) 0.120(6) 0.015(5) 0.034(5) -0.026(6)
 C30' 0.059(3) 0.068(3) 0.076(4) 0.013(3) 0.026(3) 0.007(3)
 C31' 0.080(5) 0.077(4) 0.082(3) 0.005(3) 0.024(3) 0.007(4)
 C32' 0.089(4) 0.085(4) 0.084(4) 0.004(3) 0.025(4) 0.001(4)
 C33' 0.105(5) 0.111(5) 0.113(4) 0.009(4) 0.011(4) -0.022(4)
 C34' 0.094(5) 0.106(5) 0.108(5) 0.003(4) 0.003(4) -0.036(5)
 C35' 0.140(6) 0.131(6) 0.134(6) 0.016(5) 0.009(5) -0.027(5)
 C36' 0.136(6) 0.135(6) 0.122(6) 0.020(5) 0.024(5) -0.043(5)
 C37' 0.147(6) 0.138(7) 0.120(6) 0.015(5) 0.034(5) -0.026(6)
 C38 0.095(4) 0.076(4) 0.092(4) -0.002(3) 0.037(4) 0.003(3)
 C39 0.090(4) 0.075(4) 0.083(4) -0.001(3) 0.010(3) -0.001(3)
 C40 0.078(3) 0.073(4) 0.069(3) -0.005(3) -0.001(3) 0.012(3)
 C41 0.050(3) 0.076(3) 0.062(3) -0.004(2) 0.012(2) 0.013(2)
 C42 0.059(3) 0.102(5) 0.081(4) 0.002(3) 0.005(3) -0.003(3)
 C43 0.065(3) 0.108(5) 0.096(4) 0.000(4) 0.013(3) -0.021(3)
 C44 0.051(3) 0.081(3) 0.059(3) -0.006(2) 0.002(2) 0.010(2)
 C45 0.049(3) 0.080(4) 0.072(3) -0.012(3) 0.005(2) 0.019(2)
 C46 0.055(3) 0.072(3) 0.075(3) -0.002(3) 0.005(2) 0.017(2)
 C47 0.069(3) 0.085(4) 0.081(3) -0.010(3) 0.007(3) 0.011(3)
 C48 0.085(4) 0.098(5) 0.085(4) -0.011(3) 0.007(3) -0.002(4)
 C49 0.067(3) 0.087(4) 0.082(4) -0.002(3) -0.015(3) 0.007(3)
 C50 0.065(3) 0.080(4) 0.095(4) 0.022(3) 0.006(3) 0.012(3)
 C51 0.062(3) 0.067(3) 0.079(3) 0.006(3) 0.002(3) 0.007(3)
 C52 0.071(4) 0.108(5) 0.103(4) 0.014(4) -0.010(3) -0.001(4)
 C53 0.093(5) 0.106(5) 0.083(4) 0.014(4) 0.006(3) 0.002(4)
 C54 0.100(5) 0.112(6) 0.096(4) 0.026(4) 0.019(4) 0.020(4)
 C55 0.085(4) 0.113(6) 0.136(6) 0.022(5) 0.034(4) 0.005(4)
 C56 0.092(5) 0.083(5) 0.150(7) 0.012(4) 0.021(5) -0.014(4)
 C57 0.108(5) 0.118(6) 0.094(5) -0.005(4) 0.007(4) 0.004(5)
 C58 0.106(5) 0.085(4) 0.108(5) -0.017(4) 0.035(4) -0.019(4)
 C59 0.071(3) 0.062(3) 0.099(4) -0.001(3) 0.020(3) -0.006(3)
 C60 0.033(2) 0.067(3) 0.071(3) 0.011(2) 0.004(2) -0.004(2)
 C61 0.044(2) 0.058(3) 0.067(3) 0.013(2) 0.004(2) 0.002(2)
 C62 0.034(2) 0.053(2) 0.072(3) 0.018(2) 0.0049(19) -0.0025(18)
 C63 0.0277(18) 0.054(2) 0.071(3) 0.014(2) 0.0090(18) 0.0008(17)
 C64 0.046(2) 0.060(3) 0.072(3) 0.018(2) -0.003(2) -0.001(2)
 C65 0.048(2) 0.049(3) 0.083(3) 0.013(2) 0.004(2) 0.001(2)
 C66 0.0275(18) 0.057(3) 0.074(3) 0.016(2) 0.0068(18) -0.0003(17)
 C71 0.035(2) 0.045(2) 0.062(2) 0.0067(18) 0.0056(18) -0.0055(17)
 C72 0.0321(18) 0.042(2) 0.058(2) 0.0071(17) 0.0043(16) -0.0020(15)
 C73 0.0310(18) 0.0352(19) 0.057(2) 0.0092(16) 0.0008(16) -0.0021(15)
 C74 0.0274(17) 0.046(2) 0.059(2) 0.0051(18) 0.0074(17) -0.0002(16)
 C75 0.0245(17) 0.042(2) 0.068(2) 0.0069(18) -0.0018(17) -0.0027(15)
 C76 0.0249(17) 0.036(2) 0.061(2) 0.0090(17) 0.0053(16) -0.0001(14)
 C77 0.037(2) 0.062(3) 0.065(3) 0.002(2) 0.0006(19) -0.0006(19)
 C78 0.0300(18) 0.053(2) 0.062(2) 0.0094(19) 0.0028(17) -0.0010(17)
 C79 0.036(2) 0.052(2) 0.060(2) 0.0043(19) 0.0048(18) -0.0007(18)
 C80 0.0272(17) 0.042(2) 0.060(2) 0.0131(17) 0.0004(16) 0.0013(15)
 C81 0.0318(18) 0.046(2) 0.056(2) 0.0121(17) 0.0029(17) 0.0042(16)
 C82 0.0301(18) 0.0354(19) 0.064(2) 0.0103(17) -0.0087(17) 0.0040(15)
 C83 0.0210(16) 0.046(2) 0.063(2) 0.0138(18) -0.0002(16) 0.0025(15)
 C84 0.0283(18) 0.045(2) 0.062(2) 0.0078(18) 0.0004(17) 0.0057(16)
 C85 0.0316(18) 0.040(2) 0.056(2) 0.0079(17) -0.0036(16) 0.0038(15)
 C86 0.0244(16) 0.046(2) 0.056(2) 0.0161(17) -0.0009(16) -0.0028(15)
 C87 0.0272(17) 0.043(2) 0.052(2) 0.0088(17) -0.0025(15) 0.0001(15)
 C88 0.0299(18) 0.037(2) 0.057(2) 0.0105(16) -0.0044(16) -0.0022(15)
 C89 0.0289(18) 0.047(2) 0.058(2) 0.0144(18) 0.0010(16) 0.0021(16)
 C90 0.0361(19) 0.051(2) 0.051(2) 0.0133(18) 0.0056(17) 0.0049(17)
 C91 0.0321(18) 0.042(2) 0.056(2) 0.0096(17) -0.0038(17) 0.0014(16)
 C92 0.056(3) 0.059(3) 0.084(3) 0.010(2) -0.007(2) -0.010(2)
 Cl1 0.0510(7) 0.0821(9) 0.0866(9) -0.0038(7) 0.0080(6) -0.0041(6)
 Cl2 0.0614(7) 0.0723(8) 0.0722(8) 0.0065(6) 0.0017(6) 0.0019(6)
 C93 0.094(5) 0.101(4) 0.072(5) 0.006(4) 0.016(3) 0.006(4)
 Cl3 0.131(4) 0.070(2) 0.109(2) 0.0018(16) 0.041(3) 0.014(2)
 Cl4 0.096(2) 0.153(4) 0.091(2) -0.007(2) 0.0001(14) -0.0091(19)
 C93' 0.094(5) 0.101(4) 0.072(5) 0.006(4) 0.016(3) 0.006(4)
 Cl3' 0.113(8) 0.114(8) 0.164(11) 0.008(6) 0.034(7) -0.029(6)
 Cl4' 0.216(11) 0.178(12) 0.135(8) -0.009(8) 0.017(7) -0.043(9)
 C94 0.041(2) 0.059(3) 0.077(3) 0.006(2) -0.003(2) -0.003(2)
 Cl5 0.0511(7) 0.0594(8) 0.1340(13) 0.0112(7) 0.0091(7) 0.0059(6)
 Cl6 0.0715(9) 0.1343(15) 0.0784(9) -0.0020(9) 0.0087(7) -0.0201(9)
 C95 0.088(4) 0.098(5) 0.101(4) 0.000(4) 0.021(4) -0.016(4)
 Cl7 0.1105(13) 0.0921(12) 0.1262(14) -0.0241(10) -0.0245(11) 0.0214(10)
 Cl8 0.1037(13) 0.1335(17) 0.0982(12) -0.0058(11) 0.0093(10) -0.0361(12)
 Cl9 0.125(3) 0.0558(16) 0.097(2) -0.0032(12) 0.0483(19) 0.0094(15)
 Cl10 0.0529(16) 0.085(2) 0.255(8) 0.030(3) 0.030(3) 0.0248(15)
 C96 0.051(9) 0.043(7) 0.107(13) 0.010(8) 0.020(8) -0.004(6)
 Cl11 0.325(15) 0.225(8) 0.078(3) 0.042(4) 0.052(5) 0.204(10)
 Cl12 0.179(6) 0.175(6) 0.136(5) 0.060(4) -0.071(5) -0.100(5)
 C97 0.063(12) 0.08(2) 0.072(10) -0.001(10) 0.018(9) 0.018(11)

_geom_special_details
;
 All esds (except the esd in the dihedral angle between two l.s. planes)
 are estimated using the full covariance matrix.  The cell esds are taken
 into account individually in the estimation of esds in distances, angles
 and torsion angles; correlations between esds in cell parameters are only
 used when they are defined by crystal symmetry.  An approximate (isotropic)
 treatment of cell esds is used for estimating esds involving l.s. planes.
;
loop_
  _geom_bond_atom_site_label_1
  _geom_bond_atom_site_label_2
  _geom_bond_distance
  _geom_bond_site_symmetry_2
  _geom_bond_publ_flag
 N1 C1 1.483(5) . ?
 N1 C66 1.485(5) . ?
 N1 C71 1.344(5) . ?
 N2 C22 1.472(5) . ?
 N2 C23 1.478(5) . ?
 N2 C74 1.348(5) . ?
 N3 C44 1.476(6) . ?
 N3 C45 1.462(7) . ?
 N3 C77 1.358(6) . ?
 N4 C71 1.376(5) . ?
 N4 C73 1.307(5) . ?
 N5 C71 1.350(5) . ?
 N5 C72 1.317(5) . ?
 N6 C72 1.332(5) . ?
 N6 C73 1.343(5) . ?
 N7 C74 1.374(5) . ?
 N7 C76 1.313(5) . ?
 N8 C74 1.356(5) . ?
 N8 C75 1.323(5) . ?
 N9 C75 1.335(5) . ?
 N9 C76 1.330(5) . ?
 N10 C77 1.354(6) . ?
 N10 C79 1.340(6) . ?
 N11 C77 1.372(6) . ?
 N11 C78 1.305(6) . ?
 N12 C78 1.325(5) . ?
 N12 C79 1.329(5) . ?
 O1 C5 1.377(8) . ?
 O1 C8 1.409(9) . ?
 O1 C8' 1.415(10) . ?
 O2 C15 1.429(9) . ?
 O2 C15' 1.423(9) . ?
 O2 C16 1.401(7) . ?
 O3 C27 1.385(5) . ?
 O3 C30 1.423(6) . ?
 O3 C30' 1.423(10) . ?
 O4 C37 1.377(8) . ?
 O4 C37' 1.407(10) . ?
 O4 C38 1.372(8) . ?
 O5 C49 1.389(8) . ?
 O5 C52 1.435(8) . ?
 O6 C59 1.451(7) . ?
 O6 C60 1.363(6) . ?
 O7 C72 1.369(5) . ?
 O7 C80 1.414(4) . ?
 O8 C75 1.375(5) . ?
 O8 C82 1.417(5) . ?
 O9 C78 1.373(5) . ?
 O9 C84 1.410(5) . ?
 O10 C73 1.371(5) . ?
 O10 C86 1.414(4) . ?
 O11 C76 1.356(5) . ?
 O11 C88 1.419(5) . ?
 O12 C79 1.357(5) . ?
 O12 C90 1.431(5) . ?
 C1 H1A 0.9900 . ?
 C1 H1B 0.9900 . ?
 C1 C2 1.518(7) . ?
 C2 C3 1.361(7) . ?
 C2 C7 1.405(7) . ?
 C3 H3 0.9500 . ?
 C3 C4 1.405(8) . ?
 C4 H4 0.9500 . ?
 C4 C5 1.399(9) . ?
 C5 C6 1.385(9) . ?
 C6 H6 0.9500 . ?
 C6 C7 1.351(9) . ?
 C7 H7 0.9500 . ?
 C8 H8A 0.9900 . ?
 C8 H8B 0.9900 . ?
 C8 C9 1.558(9) . ?
 C9 H9A 0.9900 . ?
 C9 H9B 0.9900 . ?
 C9 C10 1.548(9) . ?
 C10 H10A 0.9900 . ?
 C10 H10B 0.9900 . ?
 C10 C11 1.532(9) . ?
 C11 H11A 0.9900 . ?
 C11 H11B 0.9900 . ?
 C11 C12 1.558(10) . ?
 C12 H12A 0.9900 . ?
 C12 H12B 0.9900 . ?
 C12 C13 1.543(10) . ?
 C13 H13A 0.9900 . ?
 C13 H13B 0.9900 . ?
 C13 C14 1.514(10) . ?
 C14 H14A 0.9900 . ?
 C14 H14B 0.9900 . ?
 C14 C15 1.526(10) . ?
 C15 H15A 0.9900 . ?
 C15 H15B 0.9900 . ?
 C8' H8'A 0.9900 . ?
 C8' H8'B 0.9900 . ?
 C8' C9' 1.548(10) . ?
 C9' H9'A 0.9900 . ?
 C9' H9'B 0.9900 . ?
 C9' C10' 1.527(10) . ?
 C10' H10C 0.9900 . ?
 C10' H10D 0.9900 . ?
 C10' C11' 1.534(10) . ?
 C11' H11C 0.9900 . ?
 C11' H11D 0.9900 . ?
 C11' C12' 1.550(10) . ?
 C12' H12C 0.9900 . ?
 C12' H12D 0.9900 . ?
 C12' C13' 1.535(10) . ?
 C13' H13C 0.9900 . ?
 C13' H13D 0.9900 . ?
 C13' C14' 1.549(10) . ?
 C14' H14C 0.9900 . ?
 C14' H14D 0.9900 . ?
 C14' C15' 1.543(10) . ?
 C15' H15C 0.9900 . ?
 C15' H15D 0.9900 . ?
 C16 C17 1.394(9) . ?
 C16 C21 1.340(9) . ?
 C17 H17 0.9500 . ?
 C17 C18 1.436(8) . ?
 C18 H18 0.9500 . ?
 C18 C19 1.382(7) . ?
 C19 C20 1.394(7) . ?
 C19 C22 1.522(6) . ?
 C20 H20 0.9500 . ?
 C20 C21 1.382(7) . ?
 C21 H21 0.9500 . ?
 C22 H22A 0.9900 . ?
 C22 H22B 0.9900 . ?
 C23 H23A 0.9900 . ?
 C23 H23B 0.9900 . ?
 C23 C24 1.533(5) . ?
 C24 C25 1.393(6) . ?
 C24 C29 1.402(5) . ?
 C25 H25 0.9500 . ?
 C25 C26 1.376(6) . ?
 C26 H26 0.9500 . ?
 C26 C27 1.408(6) . ?
 C27 C28 1.386(6) . ?
 C28 H28 0.9500 . ?
 C28 C29 1.386(6) . ?
 C29 H29 0.9500 . ?
 C30 H30A 0.9900 . ?
 C30 H30B 0.9900 . ?
 C30 C31 1.542(7) . ?
 C31 H31A 0.9900 . ?
 C31 H31B 0.9900 . ?
 C31 C32 1.522(8) . ?
 C32 H32A 0.9900 . ?
 C32 H32B 0.9900 . ?
 C32 C33 1.530(8) . ?
 C33 H33A 0.9900 . ?
 C33 H33B 0.9900 . ?
 C33 C34 1.553(8) . ?
 C34 H34A 0.9900 . ?
 C34 H34B 0.9900 . ?
 C34 C35 1.571(8) . ?
 C35 H35A 0.9900 . ?
 C35 H35B 0.9900 . ?
 C35 C36 1.515(9) . ?
 C36 H36A 0.9900 . ?
 C36 H36B 0.9900 . ?
 C36 C37 1.559(9) . ?
 C37 H37A 0.9900 . ?
 C37 H37B 0.9900 . ?
 C30' H30C 0.9900 . ?
 C30' H30D 0.9900 . ?
 C30' C31' 1.541(10) . ?
 C31' H31C 0.9900 . ?
 C31' H31D 0.9900 . ?
 C31' C32' 1.534(10) . ?
 C32' H32C 0.9900 . ?
 C32' H32D 0.9900 . ?
 C32' C33' 1.538(10) . ?
 C33' H33C 0.9900 . ?
 C33' H33D 0.9900 . ?
 C33' C34' 1.543(10) . ?
 C34' H34C 0.9900 . ?
 C34' H34D 0.9900 . ?
 C34' C35' 1.535(10) . ?
 C35' H35C 0.9900 . ?
 C35' H35D 0.9900 . ?
 C35' C36' 1.541(10) . ?
 C36' H36C 0.9900 . ?
 C36' H36D 0.9900 . ?
 C36' C37' 1.552(10) . ?
 C37' H37C 0.9900 . ?
 C37' H37D 0.9900 . ?
 C38 C39 1.384(9) . ?
 C38 C43 1.381(10) . ?
 C39 H39 0.9500 . ?
 C39 C40 1.398(9) . ?
 C40 H40 0.9500 . ?
 C40 C41 1.406(7) . ?
 C41 C42 1.381(8) . ?
 C41 C44 1.503(8) . ?
 C42 H42 0.9500 . ?
 C42 C43 1.396(9) . ?
 C43 H43 0.9500 . ?
 C44 H44A 0.9900 . ?
 C44 H44B 0.9900 . ?
 C45 H45A 0.9900 . ?
 C45 H45B 0.9900 . ?
 C45 C46 1.503(8) . ?
 C46 C47 1.409(8) . ?
 C46 C51 1.377(7) . ?
 C47 H47 0.9500 . ?
 C47 C48 1.375(9) . ?
 C48 H48 0.9500 . ?
 C48 C49 1.372(9) . ?
 C49 C50 1.397(9) . ?
 C50 H50 0.9500 . ?
 C50 C51 1.427(8) . ?
 C51 H51 0.9500 . ?
 C52 H52A 0.9900 . ?
 C52 H52B 0.9900 . ?
 C52 C53 1.503(10) . ?
 C53 H53A 0.9900 . ?
 C53 H53B 0.9900 . ?
 C53 C54 1.502(10) . ?
 C54 H54A 0.9900 . ?
 C54 H54B 0.9900 . ?
 C54 C55 1.510(10) . ?
 C55 H55A 0.9900 . ?
 C55 H55B 0.9900 . ?
 C55 C56 1.530(10) . ?
 C56 H56A 0.9900 . ?
 C56 H56B 0.9900 . ?
 C56 C57 1.507(8) . ?
 C57 H57A 0.9900 . ?
 C57 H57B 0.9900 . ?
 C57 C58 1.495(10) . ?
 C58 H58A 0.9900 . ?
 C58 H58B 0.9900 . ?
 C58 C59 1.543(9) . ?
 C59 H59A 0.9900 . ?
 C59 H59B 0.9900 . ?
 C60 C61 1.413(7) . ?
 C60 C65 1.395(7) . ?
 C61 H61 0.9500 . ?
 C61 C62 1.377(7) . ?
 C62 H62 0.9500 . ?
 C62 C63 1.384(6) . ?
 C63 C64 1.397(7) . ?
 C63 C66 1.529(7) . ?
 C64 H64 0.9500 . ?
 C64 C65 1.389(7) . ?
 C65 H65 0.9500 . ?
 C66 H66A 0.9900 . ?
 C66 H66B 0.9900 . ?
 C80 C81 1.388(6) . ?
 C80 C85 1.390(6) . ?
 C81 H81 0.9500 . ?
 C81 C82 1.400(5) . ?
 C82 C83 1.380(6) . ?
 C83 H83 0.9500 . ?
 C83 C84 1.390(6) . ?
 C84 C85 1.393(5) . ?
 C85 H85 0.9500 . ?
 C86 C87 1.389(6) . ?
 C86 C91 1.381(6) . ?
 C87 H87 0.9500 . ?
 C87 C88 1.397(5) . ?
 C88 C89 1.378(6) . ?
 C89 H89 0.9500 . ?
 C89 C90 1.364(6) . ?
 C90 C91 1.392(5) . ?
 C91 H91 0.9500 . ?
 C92 H92A 0.9900 . ?
 C92 H92B 0.9900 . ?
 C92 Cl1 1.782(6) . ?
 C92 Cl2 1.756(6) . ?
 C93 H93A 0.9900 . ?
 C93 H93B 0.9900 . ?
 C93 Cl3 1.713(8) . ?
 C93 Cl4 1.754(8) . ?
 C93' H93C 0.9900 . ?
 C93' H93D 0.9900 . ?
 C93' Cl3' 1.712(10) . ?
 C93' Cl4' 1.730(10) . ?
 C94 H94A 0.9900 . ?
 C94 H94B 0.9900 . ?
 C94 Cl5 1.772(5) . ?
 C94 Cl6 1.767(5) . ?
 C95 H95A 0.9900 . ?
 C95 H95B 0.9900 . ?
 C95 Cl7 1.717(8) . ?
 C95 Cl8 1.753(7) . ?
 Cl9 C96 1.725(9) . ?
 Cl10 C96 1.732(9) . ?
 C96 H96A 0.9900 . ?
 C96 H96B 0.9900 . ?
 Cl11 C97 1.727(9) . ?
 Cl12 C97 1.725(10) . ?
 C97 H97A 0.9900 . ?
 C97 H97B 0.9900 . ?

loop_
  _geom_angle_atom_site_label_1
  _geom_angle_atom_site_label_2
  _geom_angle_atom_site_label_3
  _geom_angle
  _geom_angle_site_symmetry_1
  _geom_angle_site_symmetry_3
  _geom_angle_publ_flag
 C1 N1 C66 118.7(3) . . ?
 C71 N1 C1 120.0(3) . . ?
 C71 N1 C66 120.7(3) . . ?
 C22 N2 C23 116.8(3) . . ?
 C74 N2 C22 121.8(3) . . ?
 C74 N2 C23 120.6(3) . . ?
 C45 N3 C44 117.1(4) . . ?
 C77 N3 C44 118.6(4) . . ?
 C77 N3 C45 122.6(4) . . ?
 C73 N4 C71 112.9(3) . . ?
 C72 N5 C71 113.6(3) . . ?
 C72 N6 C73 111.1(3) . . ?
 C76 N7 C74 113.6(3) . . ?
 C75 N8 C74 113.4(3) . . ?
 C76 N9 C75 111.5(3) . . ?
 C79 N10 C77 112.4(4) . . ?
 C78 N11 C77 113.2(4) . . ?
 C78 N12 C79 111.4(4) . . ?
 C5 O1 C8 116.9(11) . . ?
 C5 O1 C8' 117.1(18) . . ?
 C16 O2 C15 116.5(11) . . ?
 C16 O2 C15' 119.0(10) . . ?
 C27 O3 C30 118.2(10) . . ?
 C27 O3 C30' 120(3) . . ?
 C38 O4 C37 124.6(8) . . ?
 C38 O4 C37' 121.9(14) . . ?
 C49 O5 C52 118.5(5) . . ?
 C60 O6 C59 117.0(4) . . ?
 C72 O7 C80 115.8(3) . . ?
 C75 O8 C82 116.1(3) . . ?
 C78 O9 C84 117.1(3) . . ?
 C73 O10 C86 116.8(3) . . ?
 C76 O11 C88 117.0(3) . . ?
 C79 O12 C90 115.8(3) . . ?
 N1 C1 H1A 109.3 . . ?
 N1 C1 H1B 109.3 . . ?
 N1 C1 C2 111.6(4) . . ?
 H1A C1 H1B 108.0 . . ?
 C2 C1 H1A 109.3 . . ?
 C2 C1 H1B 109.3 . . ?
 C3 C2 C1 121.2(4) . . ?
 C3 C2 C7 119.6(5) . . ?
 C7 C2 C1 119.2(4) . . ?
 C2 C3 H3 119.9 . . ?
 C2 C3 C4 120.2(5) . . ?
 C4 C3 H3 119.9 . . ?
 C3 C4 H4 121.1 . . ?
 C5 C4 C3 117.8(6) . . ?
 C5 C4 H4 121.1 . . ?
 O1 C5 C4 121.3(6) . . ?
 O1 C5 C6 116.0(6) . . ?
 C6 C5 C4 122.5(6) . . ?
 C5 C6 H6 121.2 . . ?
 C7 C6 C5 117.6(6) . . ?
 C7 C6 H6 121.2 . . ?
 C2 C7 H7 118.9 . . ?
 C6 C7 C2 122.2(6) . . ?
 C6 C7 H7 118.9 . . ?
 O1 C8 H8A 110.1 . . ?
 O1 C8 H8B 110.1 . . ?
 O1 C8 C9 107.8(13) . . ?
 H8A C8 H8B 108.5 . . ?
 C9 C8 H8A 110.1 . . ?
 C9 C8 H8B 110.1 . . ?
 C8 C9 H9A 110.0 . . ?
 C8 C9 H9B 110.0 . . ?
 H9A C9 H9B 108.4 . . ?
 C10 C9 C8 108.6(9) . . ?
 C10 C9 H9A 110.0 . . ?
 C10 C9 H9B 110.0 . . ?
 C9 C10 H10A 109.9 . . ?
 C9 C10 H10B 109.9 . . ?
 H10A C10 H10B 108.3 . . ?
 C11 C10 C9 109.1(9) . . ?
 C11 C10 H10A 109.9 . . ?
 C11 C10 H10B 109.9 . . ?
 C10 C11 H11A 109.8 . . ?
 C10 C11 H11B 109.8 . . ?
 C10 C11 C12 109.2(8) . . ?
 H11A C11 H11B 108.3 . . ?
 C12 C11 H11A 109.8 . . ?
 C12 C11 H11B 109.8 . . ?
 C11 C12 H12A 110.2 . . ?
 C11 C12 H12B 110.2 . . ?
 H12A C12 H12B 108.5 . . ?
 C13 C12 C11 107.5(9) . . ?
 C13 C12 H12A 110.2 . . ?
 C13 C12 H12B 110.2 . . ?
 C12 C13 H13A 109.5 . . ?
 C12 C13 H13B 109.5 . . ?
 H13A C13 H13B 108.0 . . ?
 C14 C13 C12 110.9(9) . . ?
 C14 C13 H13A 109.5 . . ?
 C14 C13 H13B 109.5 . . ?
 C13 C14 H14A 109.0 . . ?
 C13 C14 H14B 109.0 . . ?
 C13 C14 C15 112.8(10) . . ?
 H14A C14 H14B 107.8 . . ?
 C15 C14 H14A 109.0 . . ?
 C15 C14 H14B 109.0 . . ?
 O2 C15 C14 110.5(16) . . ?
 O2 C15 H15A 109.5 . . ?
 O2 C15 H15B 109.5 . . ?
 C14 C15 H15A 109.5 . . ?
 C14 C15 H15B 109.5 . . ?
 H15A C15 H15B 108.1 . . ?
 O1 C8' H8'A 111.9 . . ?
 O1 C8' H8'B 111.9 . . ?
 O1 C8' C9' 99(3) . . ?
 H8'A C8' H8'B 109.6 . . ?
 C9' C8' H8'A 111.9 . . ?
 C9' C8' H8'B 111.9 . . ?
 C8' C9' H9'A 109.6 . . ?
 C8' C9' H9'B 109.6 . . ?
 H9'A C9' H9'B 108.1 . . ?
 C10' C9' C8' 110.2(10) . . ?
 C10' C9' H9'A 109.6 . . ?
 C10' C9' H9'B 109.6 . . ?
 C9' C10' H10C 109.3 . . ?
 C9' C10' H10D 109.3 . . ?
 C9' C10' C11' 111.6(10) . . ?
 H10C C10' H10D 108.0 . . ?
 C11' C10' H10C 109.3 . . ?
 C11' C10' H10D 109.3 . . ?
 C10' C11' H11C 109.7 . . ?
 C10' C11' H11D 109.7 . . ?
 C10' C11' C12' 109.8(10) . . ?
 H11C C11' H11D 108.2 . . ?
 C12' C11' H11C 109.7 . . ?
 C12' C11' H11D 109.7 . . ?
 C11' C12' H12C 109.8 . . ?
 C11' C12' H12D 109.8 . . ?
 H12C C12' H12D 108.3 . . ?
 C13' C12' C11' 109.2(10) . . ?
 C13' C12' H12C 109.8 . . ?
 C13' C12' H12D 109.8 . . ?
 C12' C13' H13C 109.7 . . ?
 C12' C13' H13D 109.7 . . ?
 C12' C13' C14' 109.6(10) . . ?
 H13C C13' H13D 108.2 . . ?
 C14' C13' H13C 109.7 . . ?
 C14' C13' H13D 109.7 . . ?
 C13' C14' H14C 110.1 . . ?
 C13' C14' H14D 110.1 . . ?
 H14C C14' H14D 108.4 . . ?
 C15' C14' C13' 108.0(10) . . ?
 C15' C14' H14C 110.1 . . ?
 C15' C14' H14D 110.1 . . ?
 O2 C15' C14' 116.5(18) . . ?
 O2 C15' H15C 108.2 . . ?
 O2 C15' H15D 108.2 . . ?
 C14' C15' H15C 108.2 . . ?
 C14' C15' H15D 108.2 . . ?
 H15C C15' H15D 107.3 . . ?
 C17 C16 O2 124.9(6) . . ?
 C21 C16 O2 114.7(6) . . ?
 C21 C16 C17 120.4(5) . . ?
 C16 C17 H17 120.1 . . ?
 C16 C17 C18 119.7(5) . . ?
 C18 C17 H17 120.1 . . ?
 C17 C18 H18 120.3 . . ?
 C19 C18 C17 119.3(5) . . ?
 C19 C18 H18 120.3 . . ?
 C18 C19 C20 117.9(5) . . ?
 C18 C19 C22 121.3(4) . . ?
 C20 C19 C22 120.8(4) . . ?
 C19 C20 H20 118.7 . . ?
 C21 C20 C19 122.6(6) . . ?
 C21 C20 H20 118.7 . . ?
 C16 C21 C20 120.1(6) . . ?
 C16 C21 H21 120.0 . . ?
 C20 C21 H21 120.0 . . ?
 N2 C22 C19 112.8(3) . . ?
 N2 C22 H22A 109.0 . . ?
 N2 C22 H22B 109.0 . . ?
 C19 C22 H22A 109.0 . . ?
 C19 C22 H22B 109.0 . . ?
 H22A C22 H22B 107.8 . . ?
 N2 C23 H23A 109.1 . . ?
 N2 C23 H23B 109.1 . . ?
 N2 C23 C24 112.3(3) . . ?
 H23A C23 H23B 107.9 . . ?
 C24 C23 H23A 109.1 . . ?
 C24 C23 H23B 109.1 . . ?
 C25 C24 C23 120.8(3) . . ?
 C25 C24 C29 117.4(4) . . ?
 C29 C24 C23 121.9(4) . . ?
 C24 C25 H25 119.0 . . ?
 C26 C25 C24 122.0(4) . . ?
 C26 C25 H25 119.0 . . ?
 C25 C26 H26 120.2 . . ?
 C25 C26 C27 119.6(4) . . ?
 C27 C26 H26 120.2 . . ?
 O3 C27 C26 115.9(4) . . ?
 O3 C27 C28 124.6(4) . . ?
 C28 C27 C26 119.5(4) . . ?
 C27 C28 H28 120.1 . . ?
 C29 C28 C27 119.7(4) . . ?
 C29 C28 H28 120.1 . . ?
 C24 C29 H29 119.2 . . ?
 C28 C29 C24 121.7(4) . . ?
 C28 C29 H29 119.2 . . ?
 O3 C30 H30A 109.5 . . ?
 O3 C30 H30B 109.5 . . ?
 O3 C30 C31 110.7(8) . . ?
 H30A C30 H30B 108.1 . . ?
 C31 C30 H30A 109.5 . . ?
 C31 C30 H30B 109.5 . . ?
 C30 C31 H31A 109.5 . . ?
 C30 C31 H31B 109.5 . . ?
 H31A C31 H31B 108.1 . . ?
 C32 C31 C30 110.8(6) . . ?
 C32 C31 H31A 109.5 . . ?
 C32 C31 H31B 109.5 . . ?
 C31 C32 H32A 109.0 . . ?
 C31 C32 H32B 109.0 . . ?
 C31 C32 C33 113.1(6) . . ?
 H32A C32 H32B 107.8 . . ?
 C33 C32 H32A 109.0 . . ?
 C33 C32 H32B 109.0 . . ?
 C32 C33 H33A 110.1 . . ?
 C32 C33 H33B 110.1 . . ?
 C32 C33 C34 108.0(6) . . ?
 H33A C33 H33B 108.4 . . ?
 C34 C33 H33A 110.1 . . ?
 C34 C33 H33B 110.1 . . ?
 C33 C34 H34A 110.3 . . ?
 C33 C34 H34B 110.3 . . ?
 C33 C34 C35 107.3(6) . . ?
 H34A C34 H34B 108.5 . . ?
 C35 C34 H34A 110.3 . . ?
 C35 C34 H34B 110.3 . . ?
 C34 C35 H35A 110.2 . . ?
 C34 C35 H35B 110.2 . . ?
 H35A C35 H35B 108.5 . . ?
 C36 C35 C34 107.6(7) . . ?
 C36 C35 H35A 110.2 . . ?
 C36 C35 H35B 110.2 . . ?
 C35 C36 H36A 110.0 . . ?
 C35 C36 H36B 110.0 . . ?
 C35 C36 C37 108.5(7) . . ?
 H36A C36 H36B 108.4 . . ?
 C37 C36 H36A 110.0 . . ?
 C37 C36 H36B 110.0 . . ?
 O4 C37 C36 105.0(8) . . ?
 O4 C37 H37A 110.7 . . ?
 O4 C37 H37B 110.7 . . ?
 C36 C37 H37A 110.7 . . ?
 C36 C37 H37B 110.7 . . ?
 H37A C37 H37B 108.8 . . ?
 O3 C30' H30C 109.1 . . ?
 O3 C30' H30D 109.1 . . ?
 O3 C30' C31' 113(2) . . ?
 H30C C30' H30D 107.8 . . ?
 C31' C30' H30C 109.1 . . ?
 C31' C30' H30D 109.1 . . ?
 C30' C31' H31C 109.6 . . ?
 C30' C31' H31D 109.6 . . ?
 H31C C31' H31D 108.2 . . ?
 C32' C31' C30' 110.1(10) . . ?
 C32' C31' H31C 109.6 . . ?
 C32' C31' H31D 109.6 . . ?
 C31' C32' H32C 109.5 . . ?
 C31' C32' H32D 109.5 . . ?
 C31' C32' C33' 110.6(10) . . ?
 H32C C32' H32D 108.1 . . ?
 C33' C32' H32C 109.5 . . ?
 C33' C32' H32D 109.5 . . ?
 C32' C33' H33C 110.0 . . ?
 C32' C33' H33D 110.0 . . ?
 C32' C33' C34' 108.5(9) . . ?
 H33C C33' H33D 108.4 . . ?
 C34' C33' H33C 110.0 . . ?
 C34' C33' H33D 110.0 . . ?
 C33' C34' H34C 109.8 . . ?
 C33' C34' H34D 109.8 . . ?
 H34C C34' H34D 108.2 . . ?
 C35' C34' C33' 109.5(9) . . ?
 C35' C34' H34C 109.8 . . ?
 C35' C34' H34D 109.8 . . ?
 C34' C35' H35C 109.6 . . ?
 C34' C35' H35D 109.6 . . ?
 C34' C35' C36' 110.4(10) . . ?
 H35C C35' H35D 108.1 . . ?
 C36' C35' H35C 109.6 . . ?
 C36' C35' H35D 109.6 . . ?
 C35' C36' H36C 110.2 . . ?
 C35' C36' H36D 110.2 . . ?
 C35' C36' C37' 107.7(9) . . ?
 H36C C36' H36D 108.5 . . ?
 C37' C36' H36C 110.2 . . ?
 C37' C36' H36D 110.2 . . ?
 O4 C37' C36' 105.7(19) . . ?
 O4 C37' H37C 110.6 . . ?
 O4 C37' H37D 110.6 . . ?
 C36' C37' H37C 110.6 . . ?
 C36' C37' H37D 110.6 . . ?
 H37C C37' H37D 108.7 . . ?
 O4 C38 C39 119.0(7) . . ?
 O4 C38 C43 120.8(7) . . ?
 C43 C38 C39 120.0(6) . . ?
 C38 C39 H39 120.6 . . ?
 C38 C39 C40 118.9(6) . . ?
 C40 C39 H39 120.6 . . ?
 C39 C40 H40 119.0 . . ?
 C39 C40 C41 122.0(6) . . ?
 C41 C40 H40 119.0 . . ?
 C40 C41 C44 118.3(5) . . ?
 C42 C41 C40 117.3(5) . . ?
 C42 C41 C44 124.3(5) . . ?
 C41 C42 H42 119.4 . . ?
 C41 C42 C43 121.2(6) . . ?
 C43 C42 H42 119.4 . . ?
 C38 C43 C42 120.5(6) . . ?
 C38 C43 H43 119.8 . . ?
 C42 C43 H43 119.8 . . ?
 N3 C44 C41 114.7(4) . . ?
 N3 C44 H44A 108.6 . . ?
 N3 C44 H44B 108.6 . . ?
 C41 C44 H44A 108.6 . . ?
 C41 C44 H44B 108.6 . . ?
 H44A C44 H44B 107.6 . . ?
 N3 C45 H45A 109.4 . . ?
 N3 C45 H45B 109.4 . . ?
 N3 C45 C46 111.1(4) . . ?
 H45A C45 H45B 108.0 . . ?
 C46 C45 H45A 109.4 . . ?
 C46 C45 H45B 109.4 . . ?
 C47 C46 C45 122.1(5) . . ?
 C51 C46 C45 120.5(5) . . ?
 C51 C46 C47 117.3(5) . . ?
 C46 C47 H47 118.8 . . ?
 C48 C47 C46 122.3(6) . . ?
 C48 C47 H47 118.8 . . ?
 C47 C48 H48 120.1 . . ?
 C49 C48 C47 119.8(6) . . ?
 C49 C48 H48 120.1 . . ?
 O5 C49 C50 124.0(6) . . ?
 C48 C49 O5 115.2(6) . . ?
 C48 C49 C50 120.6(6) . . ?
 C49 C50 H50 120.8 . . ?
 C49 C50 C51 118.5(6) . . ?
 C51 C50 H50 120.8 . . ?
 C46 C51 C50 121.4(5) . . ?
 C46 C51 H51 119.3 . . ?
 C50 C51 H51 119.3 . . ?
 O5 C52 H52A 109.0 . . ?
 O5 C52 H52B 109.0 . . ?
 O5 C52 C53 113.0(6) . . ?
 H52A C52 H52B 107.8 . . ?
 C53 C52 H52A 109.0 . . ?
 C53 C52 H52B 109.0 . . ?
 C52 C53 H53A 109.4 . . ?
 C52 C53 H53B 109.4 . . ?
 H53A C53 H53B 108.0 . . ?
 C54 C53 C52 111.3(6) . . ?
 C54 C53 H53A 109.4 . . ?
 C54 C53 H53B 109.4 . . ?
 C53 C54 H54A 108.2 . . ?
 C53 C54 H54B 108.2 . . ?
 C53 C54 C55 116.4(6) . . ?
 H54A C54 H54B 107.4 . . ?
 C55 C54 H54A 108.2 . . ?
 C55 C54 H54B 108.2 . . ?
 C54 C55 H55A 109.2 . . ?
 C54 C55 H55B 109.2 . . ?
 C54 C55 C56 111.9(6) . . ?
 H55A C55 H55B 107.9 . . ?
 C56 C55 H55A 109.2 . . ?
 C56 C55 H55B 109.2 . . ?
 C55 C56 H56A 107.9 . . ?
 C55 C56 H56B 107.9 . . ?
 H56A C56 H56B 107.2 . . ?
 C57 C56 C55 117.5(7) . . ?
 C57 C56 H56A 107.9 . . ?
 C57 C56 H56B 107.9 . . ?
 C56 C57 H57A 109.3 . . ?
 C56 C57 H57B 109.3 . . ?
 H57A C57 H57B 107.9 . . ?
 C58 C57 C56 111.7(7) . . ?
 C58 C57 H57A 109.3 . . ?
 C58 C57 H57B 109.3 . . ?
 C57 C58 H58A 108.2 . . ?
 C57 C58 H58B 108.2 . . ?
 C57 C58 C59 116.2(6) . . ?
 H58A C58 H58B 107.4 . . ?
 C59 C58 H58A 108.2 . . ?
 C59 C58 H58B 108.2 . . ?
 O6 C59 C58 105.2(5) . . ?
 O6 C59 H59A 110.7 . . ?
 O6 C59 H59B 110.7 . . ?
 C58 C59 H59A 110.7 . . ?
 C58 C59 H59B 110.7 . . ?
 H59A C59 H59B 108.8 . . ?
 O6 C60 C61 115.7(4) . . ?
 O6 C60 C65 125.3(5) . . ?
 C65 C60 C61 119.0(5) . . ?
 C60 C61 H61 120.1 . . ?
 C62 C61 C60 119.8(4) . . ?
 C62 C61 H61 120.1 . . ?
 C61 C62 H62 119.0 . . ?
 C61 C62 C63 122.1(4) . . ?
 C63 C62 H62 119.0 . . ?
 C62 C63 C64 117.6(4) . . ?
 C62 C63 C66 120.8(4) . . ?
 C64 C63 C66 121.6(4) . . ?
 C63 C64 H64 119.0 . . ?
 C65 C64 C63 122.1(4) . . ?
 C65 C64 H64 119.0 . . ?
 C60 C65 H65 120.3 . . ?
 C64 C65 C60 119.4(5) . . ?
 C64 C65 H65 120.3 . . ?
 N1 C66 C63 112.0(3) . . ?
 N1 C66 H66A 109.2 . . ?
 N1 C66 H66B 109.2 . . ?
 C63 C66 H66A 109.2 . . ?
 C63 C66 H66B 109.2 . . ?
 H66A C66 H66B 107.9 . . ?
 N1 C71 N4 117.6(3) . . ?
 N1 C71 N5 118.0(4) . . ?
 N5 C71 N4 124.4(3) . . ?
 N5 C72 N6 128.8(4) . . ?
 N5 C72 O7 113.7(3) . . ?
 N6 C72 O7 117.6(3) . . ?
 N4 C73 N6 129.0(3) . . ?
 N4 C73 O10 113.9(3) . . ?
 N6 C73 O10 117.0(3) . . ?
 N2 C74 N7 117.4(3) . . ?
 N2 C74 N8 118.7(3) . . ?
 N8 C74 N7 124.0(4) . . ?
 N8 C75 N9 128.7(4) . . ?
 N8 C75 O8 113.2(3) . . ?
 N9 C75 O8 118.1(4) . . ?
 N7 C76 N9 128.8(4) . . ?
 N7 C76 O11 113.7(3) . . ?
 N9 C76 O11 117.5(3) . . ?
 N3 C77 N11 118.5(4) . . ?
 N10 C77 N3 116.7(4) . . ?
 N10 C77 N11 124.7(4) . . ?
 N11 C78 N12 129.4(4) . . ?
 N11 C78 O9 113.5(4) . . ?
 N12 C78 O9 117.1(4) . . ?
 N10 C79 O12 112.6(4) . . ?
 N12 C79 N10 128.8(4) . . ?
 N12 C79 O12 118.6(4) . . ?
 C81 C80 O7 117.5(4) . . ?
 C81 C80 C85 123.5(3) . . ?
 C85 C80 O7 119.0(4) . . ?
 C80 C81 H81 121.9 . . ?
 C80 C81 C82 116.3(4) . . ?
 C82 C81 H81 121.9 . . ?
 C81 C82 O8 117.2(4) . . ?
 C83 C82 O8 119.8(3) . . ?
 C83 C82 C81 122.9(4) . . ?
 C82 C83 H83 121.0 . . ?
 C82 C83 C84 118.1(3) . . ?
 C84 C83 H83 121.0 . . ?
 C83 C84 O9 119.9(3) . . ?
 C83 C84 C85 121.9(4) . . ?
 C85 C84 O9 118.2(4) . . ?
 C80 C85 C84 117.3(4) . . ?
 C80 C85 H85 121.3 . . ?
 C84 C85 H85 121.3 . . ?
 C87 C86 O10 118.5(3) . . ?
 C91 C86 O10 118.2(4) . . ?
 C91 C86 C87 123.2(3) . . ?
 C86 C87 H87 121.7 . . ?
 C86 C87 C88 116.7(4) . . ?
 C88 C87 H87 121.7 . . ?
 C87 C88 O11 118.5(4) . . ?
 C89 C88 O11 119.0(3) . . ?
 C89 C88 C87 122.5(4) . . ?
 C88 C89 H89 121.1 . . ?
 C90 C89 C88 117.7(3) . . ?
 C90 C89 H89 121.1 . . ?
 C89 C90 O12 119.1(3) . . ?
 C89 C90 C91 123.5(4) . . ?
 C91 C90 O12 117.4(4) . . ?
 C86 C91 C90 116.4(4) . . ?
 C86 C91 H91 121.8 . . ?
 C90 C91 H91 121.8 . . ?
 H92A C92 H92B 107.8 . . ?
 Cl1 C92 H92A 109.0 . . ?
 Cl1 C92 H92B 109.0 . . ?
 Cl2 C92 H92A 109.0 . . ?
 Cl2 C92 H92B 109.0 . . ?
 Cl2 C92 Cl1 112.8(3) . . ?
 H93A C93 H93B 107.9 . . ?
 Cl3 C93 H93A 109.3 . . ?
 Cl3 C93 H93B 109.3 . . ?
 Cl3 C93 Cl4 111.8(6) . . ?
 Cl4 C93 H93A 109.3 . . ?
 Cl4 C93 H93B 109.3 . . ?
 H93C C93' H93D 108.3 . . ?
 Cl3' C93' H93C 110.0 . . ?
 Cl3' C93' H93D 110.0 . . ?
 Cl3' C93' Cl4' 108.7(8) . . ?
 Cl4' C93' H93C 110.0 . . ?
 Cl4' C93' H93D 110.0 . . ?
 H94A C94 H94B 107.8 . . ?
 Cl5 C94 H94A 109.0 . . ?
 Cl5 C94 H94B 109.0 . . ?
 Cl6 C94 H94A 109.0 . . ?
 Cl6 C94 H94B 109.0 . . ?
 Cl6 C94 Cl5 113.1(3) . . ?
 H95A C95 H95B 107.7 . . ?
 Cl7 C95 H95A 108.9 . . ?
 Cl7 C95 H95B 108.9 . . ?
 Cl7 C95 Cl8 113.4(4) . . ?
 Cl8 C95 H95A 108.9 . . ?
 Cl8 C95 H95B 108.9 . . ?
 Cl9 C96 Cl10 112.5(6) . . ?
 Cl9 C96 H96A 109.1 . . ?
 Cl9 C96 H96B 109.1 . . ?
 Cl10 C96 H96A 109.1 . . ?
 Cl10 C96 H96B 109.1 . . ?
 H96A C96 H96B 107.8 . . ?
 Cl11 C97 H97A 109.9 . . ?
 Cl11 C97 H97B 109.9 . . ?
 Cl12 C97 Cl11 108.9(7) . . ?
 Cl12 C97 H97A 109.9 . . ?
 Cl12 C97 H97B 109.9 . . ?
 H97A C97 H97B 108.3 . . ?

loop_
  _geom_torsion_atom_site_label_1
  _geom_torsion_atom_site_label_2
  _geom_torsion_atom_site_label_3
  _geom_torsion_atom_site_label_4
  _geom_torsion
  _geom_torsion_site_symmetry_1
  _geom_torsion_site_symmetry_2
  _geom_torsion_site_symmetry_3
  _geom_torsion_site_symmetry_4
  _geom_torsion_publ_flag
 N1 C1 C2 C3 -94.2(5) . . . . ?
 N1 C1 C2 C7 85.9(5) . . . . ?
 N2 C23 C24 C25 177.9(3) . . . . ?
 N2 C23 C24 C29 -1.6(5) . . . . ?
 N3 C45 C46 C47 -106.4(5) . . . . ?
 N3 C45 C46 C51 70.0(6) . . . . ?
 O1 C5 C6 C7 -177.7(6) . . . . ?
 O1 C8 C9 C10 -55(3) . . . . ?
 O1 C8' C9' C10' -102(3) . . . . ?
 O2 C16 C17 C18 -174.2(5) . . . . ?
 O2 C16 C21 C20 175.6(5) . . . . ?
 O3 C27 C28 C29 -176.7(4) . . . . ?
 O3 C30 C31 C32 -59.6(17) . . . . ?
 O3 C30' C31' C32' -50(5) . . . . ?
 O4 C38 C39 C40 -178.6(6) . . . . ?
 O4 C38 C43 C42 178.5(6) . . . . ?
 O5 C49 C50 C51 -177.8(5) . . . . ?
 O5 C52 C53 C54 -177.9(6) . . . . ?
 O6 C60 C61 C62 179.2(4) . . . . ?
 O6 C60 C65 C64 -179.0(4) . . . . ?
 O7 C80 C81 C82 -179.7(3) . . . . ?
 O7 C80 C85 C84 178.9(3) . . . . ?
 O8 C82 C83 C84 -179.3(3) . . . . ?
 O9 C84 C85 C80 -177.9(3) . . . . ?
 O10 C86 C87 C88 178.0(3) . . . . ?
 O10 C86 C91 C90 -177.3(3) . . . . ?
 O11 C88 C89 C90 179.6(3) . . . . ?
 O12 C90 C91 C86 179.3(3) . . . . ?
 C1 N1 C66 C63 110.8(4) . . . . ?
 C1 N1 C71 N4 167.6(4) . . . . ?
 C1 N1 C71 N5 -12.2(6) . . . . ?
 C1 C2 C3 C4 179.2(4) . . . . ?
 C1 C2 C7 C6 -179.1(5) . . . . ?
 C2 C3 C4 C5 -1.2(8) . . . . ?
 C3 C2 C7 C6 1.0(8) . . . . ?
 C3 C4 C5 O1 177.6(5) . . . . ?
 C3 C4 C5 C6 3.3(9) . . . . ?
 C4 C5 C6 C7 -3.1(10) . . . . ?
 C5 O1 C8 C9 170.5(11) . . . . ?
 C5 O1 C8' C9' 179.6(13) . . . . ?
 C5 C6 C7 C2 1.0(9) . . . . ?
 C7 C2 C3 C4 -0.8(7) . . . . ?
 C8 O1 C5 C4 8.8(18) . . . . ?
 C8 O1 C5 C6 -176.6(16) . . . . ?
 C8 C9 C10 C11 175.7(17) . . . . ?
 C9 C10 C11 C12 -177.5(19) . . . . ?
 C10 C11 C12 C13 175.9(17) . . . . ?
 C11 C12 C13 C14 -145.2(17) . . . . ?
 C12 C13 C14 C15 102(2) . . . . ?
 C13 C14 C15 O2 -97.4(19) . . . . ?
 C15 O2 C16 C17 -21.9(13) . . . . ?
 C15 O2 C16 C21 161.3(10) . . . . ?
 C8' O1 C5 C4 5(3) . . . . ?
 C8' O1 C5 C6 180(3) . . . . ?
 C8' C9' C10' C11' 83(3) . . . . ?
 C9' C10' C11' C12' 72(3) . . . . ?
 C10' C11' C12' C13' 110(3) . . . . ?
 C11' C12' C13' C14' -139(2) . . . . ?
 C12' C13' C14' C15' -110(3) . . . . ?
 C13' C14' C15' O2 54(3) . . . . ?
 C15' O2 C16 C17 -33.3(13) . . . . ?
 C15' O2 C16 C21 149.9(10) . . . . ?
 C16 O2 C15 C14 -61.9(16) . . . . ?
 C16 O2 C15' C14' -116(2) . . . . ?
 C16 C17 C18 C19 -2.7(8) . . . . ?
 C17 C16 C21 C20 -1.4(10) . . . . ?
 C17 C18 C19 C20 1.9(7) . . . . ?
 C17 C18 C19 C22 -177.8(4) . . . . ?
 C18 C19 C20 C21 -0.8(7) . . . . ?
 C18 C19 C22 N2 102.7(5) . . . . ?
 C19 C20 C21 C16 0.6(9) . . . . ?
 C20 C19 C22 N2 -76.9(5) . . . . ?
 C21 C16 C17 C18 2.4(9) . . . . ?
 C22 N2 C23 C24 -89.0(4) . . . . ?
 C22 N2 C74 N7 179.3(3) . . . . ?
 C22 N2 C74 N8 0.7(5) . . . . ?
 C22 C19 C20 C21 178.8(5) . . . . ?
 C23 N2 C22 C19 -93.0(4) . . . . ?
 C23 N2 C74 N7 10.4(5) . . . . ?
 C23 N2 C74 N8 -168.3(3) . . . . ?
 C23 C24 C25 C26 -178.8(4) . . . . ?
 C23 C24 C29 C28 177.9(4) . . . . ?
 C24 C25 C26 C27 1.4(6) . . . . ?
 C25 C24 C29 C28 -1.6(6) . . . . ?
 C25 C26 C27 O3 175.9(4) . . . . ?
 C25 C26 C27 C28 -2.6(6) . . . . ?
 C26 C27 C28 C29 1.7(6) . . . . ?
 C27 O3 C30 C31 -85.7(11) . . . . ?
 C27 O3 C30' C31' -68(3) . . . . ?
 C27 C28 C29 C24 0.5(6) . . . . ?
 C29 C24 C25 C26 0.7(6) . . . . ?
 C30 O3 C27 C26 -175.9(5) . . . . ?
 C30 O3 C27 C28 2.6(7) . . . . ?
 C30 C31 C32 C33 -172.9(9) . . . . ?
 C31 C32 C33 C34 -71.6(11) . . . . ?
 C32 C33 C34 C35 -161.7(8) . . . . ?
 C33 C34 C35 C36 -87.8(11) . . . . ?
 C34 C35 C36 C37 165.5(9) . . . . ?
 C35 C36 C37 O4 171.8(9) . . . . ?
 C37 O4 C38 C39 -72.8(10) . . . . ?
 C37 O4 C38 C43 111.3(9) . . . . ?
 C30' O3 C27 C26 175.4(10) . . . . ?
 C30' O3 C27 C28 -6.2(11) . . . . ?
 C30' C31' C32' C33' -144(3) . . . . ?
 C31' C32' C33' C34' -112(3) . . . . ?
 C32' C33' C34' C35' 139(2) . . . . ?
 C33' C34' C35' C36' 56(3) . . . . ?
 C34' C35' C36' C37' -159(2) . . . . ?
 C35' C36' C37' O4 -94(3) . . . . ?
 C37' O4 C38 C39 -160.6(12) . . . . ?
 C37' O4 C38 C43 23.4(14) . . . . ?
 C38 O4 C37 C36 -75.5(12) . . . . ?
 C38 O4 C37' C36' 112.5(15) . . . . ?
 C38 C39 C40 C41 0.6(9) . . . . ?
 C39 C38 C43 C42 2.6(10) . . . . ?
 C39 C40 C41 C42 1.5(8) . . . . ?
 C39 C40 C41 C44 -179.4(5) . . . . ?
 C40 C41 C42 C43 -1.6(8) . . . . ?
 C40 C41 C44 N3 166.4(4) . . . . ?
 C41 C42 C43 C38 -0.4(10) . . . . ?
 C42 C41 C44 N3 -14.6(7) . . . . ?
 C43 C38 C39 C40 -2.7(9) . . . . ?
 C44 N3 C45 C46 66.7(6) . . . . ?
 C44 N3 C77 N10 -1.9(6) . . . . ?
 C44 N3 C77 N11 -179.9(4) . . . . ?
 C44 C41 C42 C43 179.4(5) . . . . ?
 C45 N3 C44 C41 119.9(5) . . . . ?
 C45 N3 C77 N10 163.3(4) . . . . ?
 C45 N3 C77 N11 -14.8(7) . . . . ?
 C45 C46 C47 C48 175.9(6) . . . . ?
 C45 C46 C51 C50 -175.6(5) . . . . ?
 C46 C47 C48 C49 -1.4(10) . . . . ?
 C47 C46 C51 C50 1.1(8) . . . . ?
 C47 C48 C49 O5 178.6(6) . . . . ?
 C47 C48 C49 C50 3.1(10) . . . . ?
 C48 C49 C50 C51 -2.8(9) . . . . ?
 C49 O5 C52 C53 -82.6(7) . . . . ?
 C49 C50 C51 C46 0.6(8) . . . . ?
 C51 C46 C47 C48 -0.7(9) . . . . ?
 C52 O5 C49 C48 -175.8(6) . . . . ?
 C52 O5 C49 C50 -0.5(9) . . . . ?
 C52 C53 C54 C55 174.0(7) . . . . ?
 C53 C54 C55 C56 169.9(7) . . . . ?
 C54 C55 C56 C57 -177.0(8) . . . . ?
 C55 C56 C57 C58 179.1(7) . . . . ?
 C56 C57 C58 C59 -77.7(9) . . . . ?
 C57 C58 C59 O6 -69.7(7) . . . . ?
 C59 O6 C60 C61 -174.1(4) . . . . ?
 C59 O6 C60 C65 5.8(6) . . . . ?
 C60 O6 C59 C58 171.0(4) . . . . ?
 C60 C61 C62 C63 0.1(6) . . . . ?
 C61 C60 C65 C64 0.9(6) . . . . ?
 C61 C62 C63 C64 0.3(6) . . . . ?
 C61 C62 C63 C66 179.1(4) . . . . ?
 C62 C63 C64 C65 -0.1(6) . . . . ?
 C62 C63 C66 N1 135.6(4) . . . . ?
 C63 C64 C65 C60 -0.5(7) . . . . ?
 C64 C63 C66 N1 -45.6(5) . . . . ?
 C65 C60 C61 C62 -0.7(6) . . . . ?
 C66 N1 C1 C2 90.3(4) . . . . ?
 C66 N1 C71 N4 -3.9(6) . . . . ?
 C66 N1 C71 N5 176.4(4) . . . . ?
 C66 C63 C64 C65 -178.9(4) . . . . ?
 C71 N1 C1 C2 -81.3(5) . . . . ?
 C71 N1 C66 C63 -77.7(5) . . . . ?
 C71 N4 C73 N6 -2.5(6) . . . . ?
 C71 N4 C73 O10 176.8(3) . . . . ?
 C71 N5 C72 N6 -0.8(7) . . . . ?
 C71 N5 C72 O7 178.7(3) . . . . ?
 C72 N5 C71 N1 176.0(4) . . . . ?
 C72 N5 C71 N4 -3.7(6) . . . . ?
 C72 N6 C73 N4 -1.2(6) . . . . ?
 C72 N6 C73 O10 179.5(3) . . . . ?
 C72 O7 C80 C81 -92.7(4) . . . . ?
 C72 O7 C80 C85 88.7(4) . . . . ?
 C73 N4 C71 N1 -174.5(4) . . . . ?
 C73 N4 C71 N5 5.2(6) . . . . ?
 C73 N6 C72 N5 3.1(6) . . . . ?
 C73 N6 C72 O7 -176.3(3) . . . . ?
 C73 O10 C86 C87 81.9(4) . . . . ?
 C73 O10 C86 C91 -101.1(4) . . . . ?
 C74 N2 C22 C19 97.6(4) . . . . ?
 C74 N2 C23 C24 80.5(4) . . . . ?
 C74 N7 C76 N9 2.2(5) . . . . ?
 C74 N7 C76 O11 -178.0(3) . . . . ?
 C74 N8 C75 N9 1.2(6) . . . . ?
 C74 N8 C75 O8 -177.9(3) . . . . ?
 C75 N8 C74 N2 179.3(3) . . . . ?
 C75 N8 C74 N7 0.7(5) . . . . ?
 C75 N9 C76 N7 -0.6(5) . . . . ?
 C75 N9 C76 O11 179.6(3) . . . . ?
 C75 O8 C82 C81 83.8(4) . . . . ?
 C75 O8 C82 C83 -98.6(4) . . . . ?
 C76 N7 C74 N2 179.2(3) . . . . ?
 C76 N7 C74 N8 -2.2(5) . . . . ?
 C76 N9 C75 N8 -1.3(6) . . . . ?
 C76 N9 C75 O8 177.7(3) . . . . ?
 C76 O11 C88 C87 -91.7(4) . . . . ?
 C76 O11 C88 C89 89.7(4) . . . . ?
 C77 N3 C44 C41 -74.1(5) . . . . ?
 C77 N3 C45 C46 -98.7(5) . . . . ?
 C77 N10 C79 N12 -3.0(6) . . . . ?
 C77 N10 C79 O12 176.7(3) . . . . ?
 C77 N11 C78 N12 -3.0(6) . . . . ?
 C77 N11 C78 O9 177.3(3) . . . . ?
 C78 N11 C77 N3 179.7(4) . . . . ?
 C78 N11 C77 N10 1.8(6) . . . . ?
 C78 N12 C79 N10 2.1(6) . . . . ?
 C78 N12 C79 O12 -177.5(3) . . . . ?
 C78 O9 C84 C83 88.3(4) . . . . ?
 C78 O9 C84 C85 -94.0(4) . . . . ?
 C79 N10 C77 N3 -177.1(4) . . . . ?
 C79 N10 C77 N11 0.7(6) . . . . ?
 C79 N12 C78 N11 1.2(6) . . . . ?
 C79 N12 C78 O9 -179.1(3) . . . . ?
 C79 O12 C90 C89 -98.4(4) . . . . ?
 C79 O12 C90 C91 82.2(4) . . . . ?
 C80 O7 C72 N5 176.2(4) . . . . ?
 C80 O7 C72 N6 -4.3(5) . . . . ?
 C80 C81 C82 O8 179.5(3) . . . . ?
 C80 C81 C82 C83 2.0(5) . . . . ?
 C81 C80 C85 C84 0.4(6) . . . . ?
 C81 C82 C83 C84 -1.9(5) . . . . ?
 C82 O8 C75 N8 -170.8(3) . . . . ?
 C82 O8 C75 N9 10.0(5) . . . . ?
 C82 C83 C84 O9 178.6(3) . . . . ?
 C82 C83 C84 C85 1.0(5) . . . . ?
 C83 C84 C85 C80 -0.2(5) . . . . ?
 C84 O9 C78 N11 176.2(3) . . . . ?
 C84 O9 C78 N12 -3.6(5) . . . . ?
 C85 C80 C81 C82 -1.2(6) . . . . ?
 C86 O10 C73 N4 -170.2(3) . . . . ?
 C86 O10 C73 N6 9.2(5) . . . . ?
 C86 C87 C88 O11 180.0(3) . . . . ?
 C86 C87 C88 C89 -1.5(5) . . . . ?
 C87 C86 C91 C90 -0.4(5) . . . . ?
 C87 C88 C89 C90 1.1(6) . . . . ?
 C88 O11 C76 N7 178.4(3) . . . . ?
 C88 O11 C76 N9 -1.8(5) . . . . ?
 C88 C89 C90 O12 -179.6(3) . . . . ?
 C88 C89 C90 C91 -0.3(6) . . . . ?
 C89 C90 C91 C86 0.0(6) . . . . ?
 C90 O12 C79 N10 -172.3(3) . . . . ?
 C90 O12 C79 N12 7.4(5) . . . . ?
 C91 C86 C87 C88 1.2(5) . . . . ?

loop_
  _platon_squeeze_void_nr
  _platon_squeeze_void_average_x
  _platon_squeeze_void_average_y
  _platon_squeeze_void_average_z
  _platon_squeeze_void_volume
  _platon_squeeze_void_count_electrons
  _platon_squeeze_void_content
   1  0.705  0.121  0.234       303        76 ' '
   2  0.295 -0.122  0.766       303        75 ' '
   3  0.705  0.378  0.734       303        75 ' '
   4  0.295  0.621  0.266       303        76 ' '
_platon_squeeze_details
;
;

_shelx_res_file
;
    r90428f.res created by SHELXL-2014/7

TITL r90428f in P2(1)/c
CELL 0.71073 18.0359 14.7302 39.0959 90 98.712 90
ZERR 4 0.0036 0.0029 0.0078 0 0.03 0
LATT 1
SYMM -X,0.5+Y,0.5-Z
SFAC C H N O Cl
UNIT 368 400 48 48 40
DFIX 2.8 0.01 Cl3 Cl4 Cl3' Cl4' Cl9 Cl10 Cl11 Cl12
DFIX 1.72 0.01 C96 Cl9 C96 Cl10 C97 Cl11 C97 Cl12
DFIX 1.72 0.01 C93 Cl3 C93 Cl4 C93' Cl3' C93' Cl4'
DFIX 2.52 0.01 C33' C35' C35' C37'
DFIX 2.52 0.01 C30' C32' C32' C34' C34' C36' C31' C33'
DFIX 2.52 0.01 C30 C32 C32 C34 C34 C36 C31 C33 C33 C35 C35 C37
DFIX 1.42 0.01 O3 C30 O3 C30' O4 C37 O4 C37'
DFIX 1.54 0.01 C35' C36' C36' C37'
DFIX 1.54 0.01 C30' C31' C31' C32' C32' C33' C33' C34' C34' C35'
DFIX 1.54 0.01 C30 C31 C31 C32 C32 C33 C33 C34 C34 C35 C35 C36 C36 C37
DFIX 1.54 0.01 C8 C9 C9 C10 C10 C11 C11 C12 C12 C13 C13 C14 C14 C15
DFIX 1.54 0.01 C8' C9' C9' C10' C10' C11' C11' C12' C12' C13'
DFIX 2.52 0.01 C8 C10 C10 C12 C12 C14 C9 C11 C11 C13 C13 C15
DFIX 1.54 0.01 C57 C56
DFIX 1.54 0.01 C13' C14' C14' C15'
DFIX 2.52 0.01 C8' C10' C10' C12' C12' C14' C9' C11' C11' C13' C13' C15'
DFIX 1.42 0.01 O1 C8 O1 C8' O2 C15 O2 C15'
DANG 2.5 0.02 C16 C15
DANG 2.5 0.02 C15' C16
DELU C17 C16
DELU C4 C3
SIMU 0.01 0.02 2 C30 > C37
SIMU 0.01 0.02 2 C8 > C15
ISOR 0.01 0.02 C93 > Cl4'
ISOR 0.01 0.02 C30 > C37
ISOR 0.01 0.02 C8 > C15
EADP C37 C37'
EADP C36 C36'
EADP C35 C35'
EADP C34 C34'
EADP C33 C33'
EADP C32 C32'
EADP C31 C31'
EADP C30 C30'
EADP C14 C14'
EADP C13 C13'
EADP C12 C12'
EADP C11 C11'
EADP C10 C10'
EADP C9 C9'
EADP C8 C8'
EADP C93 C93'

L.S. 10
PLAN  15
SIZE 0.12 0.08 0.04
TEMP -160
BOND $H
CONF
HTAB
MORE -1
fmap 2
acta
OMIT -3 50.02
OMIT -1 3 1
OMIT -3 6 12
OMIT -6 3 14
OMIT -13 1 8
OMIT -4 6 12
OMIT 2 4 8
OMIT -13 1 4
OMIT 4 5 6
OMIT -14 1 5
OMIT 5 7 5
OMIT 4 3 15
OMIT -5 2 6
OMIT -14 2 2
OMIT 9 1 15
OMIT -5 3 12
OMIT 3 4 7
REM <olex2.extras>
REM <HklSrc "%.\\r90428f.hkl">
REM </olex2.extras>

WGHT    0.100000
EXTI    0.008445
FVAR       4.56487   0.54501   0.73677   0.65208   0.69611
N1    3    0.544253    0.788315    0.477609    11.00000    0.02967    0.05167 =
         0.06791    0.01829    0.00500   -0.00024
N2    3    0.118460    0.241195    0.458854    11.00000    0.03063    0.03888 =
         0.05946    0.00303    0.00182   -0.00567
N3    3    0.118386    0.821546    0.675072    11.00000    0.05689    0.06906 =
         0.06330   -0.00216    0.00904    0.00909
N4    3    0.498807    0.710340    0.521859    11.00000    0.03155    0.04664 =
         0.06307    0.00958    0.00428   -0.00044
N5    3    0.416027    0.787737    0.476984    11.00000    0.03196    0.04897 =
         0.06164    0.01282    0.00301    0.00067
N6    3    0.365731    0.698954    0.519173    11.00000    0.02866    0.04213 =
         0.06103    0.00915    0.00221    0.00045
N7    3    0.197167    0.308480    0.504458    11.00000    0.02837    0.04138 =
         0.06177    0.00960    0.00220    0.00008
N8    3    0.110935    0.397867    0.464955    11.00000    0.02847    0.04207 =
         0.06206    0.00457    0.00003   -0.00297
N9    3    0.192271    0.469022    0.511410    11.00000    0.02883    0.03949 =
         0.05900    0.00934   -0.00187    0.00076
N10   3    0.188744    0.706813    0.655722    11.00000    0.04090    0.05995 =
         0.06031    0.00114    0.00605    0.00476
N11   3    0.116713    0.808660    0.615152    11.00000    0.03777    0.06450 =
         0.06071   -0.00199    0.00616    0.00539
N12   3    0.189681    0.692151    0.594463    11.00000    0.03433    0.04753 =
         0.05563    0.00496    0.00019    0.00441
O1    4    0.477202    0.553936    0.340909    11.00000    0.10925    0.12118 =
         0.10180   -0.02235   -0.02223    0.02269
O2    4    0.180285    0.258116    0.301324    11.00000    0.16151    0.10622 =
         0.08210    0.00477    0.03863   -0.00199
O3    4   -0.041499    0.028318    0.572262    11.00000    0.04600    0.05141 =
         0.07124    0.00767    0.01494   -0.00732
O4    4    0.016304    0.460076    0.750684    11.00000    0.15452    0.07683 =
         0.14967   -0.00809    0.05303   -0.02462
O5    4    0.304211    1.175442    0.723261    11.00000    0.08567    0.10244 =
         0.09878   -0.00397   -0.00369   -0.01274
O6    4    0.725711    0.995874    0.609161    11.00000    0.05570    0.06618 =
         0.07681   -0.00279    0.00483   -0.00922
O7    4    0.291417    0.781696    0.476945    11.00000    0.02744    0.04929 =
         0.06502    0.01992    0.00367    0.00072
O8    4    0.104254    0.548842    0.473324    11.00000    0.03114    0.03865 =
         0.07490    0.00512   -0.00882    0.00117
O9    4    0.115455    0.789936    0.558193    11.00000    0.03578    0.05452 =
         0.05761    0.00699    0.00633    0.01099
O10   4    0.449911    0.626275    0.560858    11.00000    0.02629    0.04898 =
         0.05894    0.01213   -0.00346   -0.00447
O11   4    0.273678    0.377540    0.546842    11.00000    0.03200    0.03900 =
         0.06056    0.00874   -0.00465    0.00238
O12   4    0.261517    0.602689    0.635279    11.00000    0.04158    0.05927 =
         0.05487    0.00909    0.00465    0.00862
C1    1    0.532649    0.827561    0.442269    11.00000    0.03650    0.05496 =
         0.07178    0.01751    0.00893   -0.00187
AFIX  23
H1A   2    0.576909    0.864524    0.439042    11.00000   -1.20000
H1B   2    0.488367    0.868099    0.439619    11.00000   -1.20000
AFIX   0
C2    1    0.520804    0.754220    0.414703    11.00000    0.04846    0.06156 =
         0.06634    0.02418    0.00175   -0.00206
C3    1    0.579095    0.721614    0.399939    11.00000    0.06158    0.07572 =
         0.06093    0.01032   -0.01385    0.00457
AFIX  43
H3    2    0.628102    0.745375    0.406668    11.00000   -1.20000
AFIX   0
C4    1    0.567000    0.652929    0.374778    11.00000    0.08187    0.09944 =
         0.06321    0.01781   -0.00142    0.03289
AFIX  43
H4    2    0.606975    0.630337    0.363944    11.00000   -1.20000
AFIX   0
C5    1    0.494123    0.618904    0.366209    11.00000    0.08696    0.07387 =
         0.08629   -0.00544   -0.02990    0.00900
C6    1    0.433988    0.653479    0.380272    11.00000    0.07232    0.09272 =
         0.08239    0.00785    0.00204   -0.00076
AFIX  43
H6    2    0.384504    0.631474    0.373273    11.00000   -1.20000
AFIX   0
C7    1    0.448263    0.719645    0.404309    11.00000    0.05819    0.09815 =
         0.06507    0.00323    0.00379   -0.01528
AFIX  43
H7    2    0.407893    0.743604    0.414530    11.00000   -1.20000
AFIX   0

PART 1
C8    1    0.537974    0.514228    0.327623    41.00000    0.13206    0.12312 =
         0.14104   -0.01625   -0.00045    0.04334
AFIX  23
H8A   2    0.576311    0.493097    0.346801    41.00000   -1.20000
H8B   2    0.561454    0.559220    0.313797    41.00000   -1.20000
AFIX   0

C9    1    0.507131    0.432467    0.304440    41.00000    0.14343    0.13826 =
         0.14389   -0.03620   -0.01460    0.02270
AFIX  23
H9A   2    0.472593    0.454473    0.284014    41.00000   -1.20000
H9B   2    0.549045    0.399822    0.296204    41.00000   -1.20000
AFIX   0

C10   1    0.464997    0.367850    0.326104    41.00000    0.15465    0.15089 =
         0.16161   -0.02323   -0.00708    0.01454
AFIX  23
H10A  2    0.500454    0.342322    0.345531    41.00000   -1.20000
H10B  2    0.425674    0.401796    0.335851    41.00000   -1.20000
AFIX   0

C11   1    0.429207    0.290976    0.302841    41.00000    0.17900    0.17959 =
         0.17772   -0.01872    0.00940    0.01491
AFIX  23
H11A  2    0.468733    0.255337    0.293940    41.00000   -1.20000
H11B  2    0.395509    0.316659    0.282838    41.00000   -1.20000
AFIX   0

C12   1    0.383739    0.228305    0.324183    41.00000    0.21283    0.20117 =
         0.21166   -0.00009    0.02077    0.00080
AFIX  23
H12A  2    0.417801    0.198608    0.343140    41.00000   -1.20000
H12B  2    0.346342    0.264360    0.334449    41.00000   -1.20000
AFIX   0

C13   1    0.343967    0.156208    0.299236    41.00000    0.20947    0.20780 =
         0.21952    0.00673    0.03516    0.00277
AFIX  23
H13A  2    0.337449    0.179880    0.275268    41.00000   -1.20000
H13B  2    0.375473    0.100966    0.300173    41.00000   -1.20000
AFIX   0

C14   1    0.268055    0.132052    0.308747    41.00000    0.22162    0.22167 =
         0.23153    0.00390    0.05335    0.01238
AFIX  23
H14A  2    0.266677    0.150339    0.333010    41.00000   -1.20000
H14B  2    0.261304    0.065397    0.307249    41.00000   -1.20000
AFIX   0

C15   1    0.203350    0.177765    0.285360    41.00000    0.24260    0.23598 =
         0.23669    0.00221    0.05093    0.01407
AFIX  23
H15A  2    0.219357    0.193567    0.262973    41.00000   -1.20000
H15B  2    0.160550    0.135168    0.280717    41.00000   -1.20000
AFIX   0

PART 0
PART 2
C8'   1    0.537719    0.517636    0.326129   -41.00000    0.13206    0.12312 =
         0.14104   -0.01625   -0.00045    0.04334
AFIX  23
H8'A  2    0.574635    0.486611    0.343581   -41.00000   -1.20000
H8'B  2    0.563386    0.564747    0.314168   -41.00000   -1.20000
AFIX   0
C9'   1    0.494141    0.449702    0.300323   -41.00000    0.14343    0.13826 =
         0.14389   -0.03620   -0.01460    0.02270
AFIX  23
H9'A  2    0.440368    0.466433    0.296099   -41.00000   -1.20000
H9'B  2    0.513569    0.452486    0.277981   -41.00000   -1.20000
AFIX   0
C10'  1    0.502785    0.353357    0.314800   -41.00000    0.15465    0.15089 =
         0.16161   -0.02323   -0.00708    0.01454
AFIX  23
H10C  2    0.554578    0.344935    0.326984   -41.00000   -1.20000
H10D  2    0.494446    0.309326    0.295468   -41.00000   -1.20000
AFIX   0
C11'  1    0.447073    0.334304    0.339936   -41.00000    0.17900    0.17959 =
         0.17772   -0.01872    0.00940    0.01491
AFIX  23
H11C  2    0.448357    0.384688    0.356774   -41.00000   -1.20000
H11D  2    0.461407    0.277704    0.352926   -41.00000   -1.20000
AFIX   0
C12'  1    0.366810    0.324598    0.319539   -41.00000    0.21283    0.20117 =
         0.21166   -0.00009    0.02077    0.00080
AFIX  23
H12C  2    0.331737    0.363899    0.329979   -41.00000   -1.20000
H12D  2    0.366295    0.343931    0.295252   -41.00000   -1.20000
AFIX   0
C13'  1    0.341855    0.225140    0.320558   -41.00000    0.20947    0.20780 =
         0.21952    0.00673    0.03516    0.00277
AFIX  23
H13C  2    0.308103    0.217650    0.338109   -41.00000   -1.20000
H13D  2    0.386194    0.185730    0.327113   -41.00000   -1.20000
AFIX   0
C14'  1    0.300389    0.196912    0.284511   -41.00000    0.22162    0.22167 =
         0.23153    0.00390    0.05335    0.01238
AFIX  23
H14C  2    0.306196    0.244534    0.267245   -41.00000   -1.20000
H14D  2    0.321634    0.139595    0.276994   -41.00000   -1.20000
AFIX   0
C15'  1    0.216682    0.183983    0.287441   -41.00000   10.10000
AFIX  23
H15C  2    0.189378    0.170540    0.264073   -41.00000   -1.20000
H15D  2    0.212011    0.130005    0.302050   -41.00000   -1.20000
AFIX   0
PART 0
C16   1    0.152824    0.246431    0.332696    11.00000    0.06048    0.10989 =
         0.07758    0.00610    0.01890   -0.00726
C17   1    0.123846    0.165545    0.343599    11.00000    0.09114    0.08789 =
         0.06814   -0.02209   -0.00367    0.01818
AFIX  43
H17   2    0.125854    0.111633    0.330434    11.00000   -1.20000
AFIX   0
C18   1    0.090928    0.164037    0.374828    11.00000    0.05030    0.07744 =
         0.06873   -0.00803    0.00600    0.00556
AFIX  43
H18   2    0.069118    0.109862    0.381958    11.00000   -1.20000
AFIX   0
C19   1    0.091318    0.242227    0.394394    11.00000    0.03393    0.06054 =
         0.06126   -0.00245   -0.00291    0.00498
C20   1    0.122098    0.320438    0.382172    11.00000    0.05205    0.07989 =
         0.07085    0.00793    0.00913   -0.01589
AFIX  43
H20   2    0.122093    0.374841    0.395222    11.00000   -1.20000
AFIX   0
C21   1    0.152609    0.321895    0.351817    11.00000    0.07577    0.10885 =
         0.07174   -0.00387    0.01442   -0.01872
AFIX  43
H21   2    0.173463    0.376480    0.344495    11.00000   -1.20000
AFIX   0
C22   1    0.059648    0.243182    0.428335    11.00000    0.03293    0.04419 =
         0.06539    0.00466    0.00483    0.00306
AFIX  23
H22A  2    0.028853    0.298511    0.429261    11.00000   -1.20000
H22B  2    0.026424    0.189938    0.429056    11.00000   -1.20000
AFIX   0
C23   1    0.140346    0.150989    0.473594    11.00000    0.02975    0.04017 =
         0.06783    0.00131    0.00411    0.00181
AFIX  23
H23A  2    0.193727    0.152608    0.484276    11.00000   -1.20000
H23B  2    0.135148    0.105530    0.454731    11.00000   -1.20000
AFIX   0
C24   1    0.092439    0.121691    0.500867    11.00000    0.02612    0.04080 =
         0.05914    0.00223   -0.00374   -0.00550
C25   1    0.103010    0.037281    0.516901    11.00000    0.02920    0.03929 =
         0.06812   -0.00001   -0.00094   -0.00041
AFIX  43
H25   2    0.141113   -0.001654    0.510999    11.00000   -1.20000
AFIX   0
C26   1    0.059991    0.008518    0.541025    11.00000    0.04045    0.04175 =
         0.06185    0.00584   -0.00144    0.00000
AFIX  43
H26   2    0.069178   -0.048890    0.551918    11.00000   -1.20000
AFIX   0
C27   1    0.002244    0.064733    0.549469    11.00000    0.03376    0.04313 =
         0.06571    0.00537    0.00430   -0.00506
C28   1   -0.008521    0.149826    0.534375    11.00000    0.03614    0.03743 =
         0.06386   -0.00114    0.00341   -0.00329
AFIX  43
H28   2   -0.046464    0.188865    0.540369    11.00000   -1.20000
AFIX   0
C29   1    0.036290    0.177720    0.510505    11.00000    0.03580    0.03631 =
         0.06194    0.00304    0.00132    0.00141
AFIX  43
H29   2    0.028750    0.236309    0.500422    11.00000   -1.20000
AFIX   0

PART 1
C30   1   -0.103732    0.079826    0.579848    31.00000    0.05851    0.06833 =
         0.07594    0.01262    0.02619    0.00700
AFIX  23
H30A  2   -0.142252    0.038354    0.586566    31.00000   -1.20000
H30B  2   -0.126346    0.113449    0.558919    31.00000   -1.20000
AFIX   0

C31   1   -0.079046    0.147489    0.609494    31.00000    0.08045    0.07698 =
         0.08191    0.00472    0.02409    0.00692
AFIX  23
H31A  2   -0.041901    0.190377    0.602435    31.00000   -1.20000
H31B  2   -0.122994    0.182971    0.614225    31.00000   -1.20000
AFIX   0

C32   1   -0.044577    0.097836    0.642208    31.00000    0.08892    0.08456 =
         0.08440    0.00403    0.02532    0.00065
AFIX  23
H32A  2    0.002651    0.068481    0.638085    31.00000   -1.20000
H32B  2   -0.079356    0.049411    0.647315    31.00000   -1.20000
AFIX   0

C33   1   -0.027926    0.160421    0.673677    31.00000    0.10491    0.11114 =
         0.11254    0.00877    0.01081   -0.02175
AFIX  23
H33A  2   -0.015817    0.123961    0.695066    31.00000   -1.20000
H33B  2   -0.072289    0.198460    0.675732    31.00000   -1.20000
AFIX   0

C34   1    0.039822    0.221454    0.668657    31.00000    0.09362    0.10649 =
         0.10815    0.00262    0.00304   -0.03596
AFIX  23
H34A  2    0.023334    0.271339    0.652292    31.00000   -1.20000
H34B  2    0.078378    0.185324    0.659235    31.00000   -1.20000
AFIX   0

C35   1    0.072808    0.261034    0.705110    31.00000    0.13988    0.13133 =
         0.13414    0.01619    0.00858   -0.02697
AFIX  23
H35A  2    0.066320    0.216862    0.723511    31.00000   -1.20000
H35B  2    0.127024    0.273698    0.706208    31.00000   -1.20000
AFIX   0

C36   1    0.030792    0.347957    0.710110    31.00000    0.13589    0.13465 =
         0.12218    0.02015    0.02376   -0.04257
AFIX  23
H36A  2   -0.023741    0.338635    0.703060    31.00000   -1.20000
H36B  2    0.047356    0.396930    0.695656    31.00000   -1.20000
AFIX   0

C37   1    0.047284    0.375004    0.749062    31.00000    0.14674    0.13829 =
         0.11973    0.01471    0.03400   -0.02599
AFIX  23
H37A  2    0.023885    0.331331    0.763446    31.00000   -1.20000
H37B  2    0.101980    0.376654    0.757214    31.00000   -1.20000
AFIX   0

PART 0
PART 2
C30'  1   -0.097586    0.082553    0.584227   -31.00000    0.05851    0.06833 =
         0.07594    0.01262    0.02619    0.00700
AFIX  23
H30C  2   -0.128626    0.043631    0.597085   -31.00000   -1.20000
H30D  2   -0.130747    0.108257    0.564055   -31.00000   -1.20000
AFIX   0
C31'  1   -0.064246    0.160656    0.607901   -31.00000    0.08045    0.07698 =
         0.08191    0.00472    0.02409    0.00692
AFIX  23
H31C  2   -0.042489    0.206991    0.593993   -31.00000   -1.20000
H31D  2   -0.104409    0.189820    0.618698   -31.00000   -1.20000
AFIX   0
C32'  1   -0.003197    0.124227    0.636183   -31.00000    0.08892    0.08456 =
         0.08440    0.00403    0.02532    0.00065
AFIX  23
H32C  2    0.046536    0.131144    0.628698   -31.00000   -1.20000
H32D  2   -0.011729    0.058784    0.639843   -31.00000   -1.20000
AFIX   0
C33'  1   -0.004095    0.175905    0.670292   -31.00000    0.10491    0.11114 =
         0.11254    0.00877    0.01081   -0.02175
AFIX  23
H33C  2   -0.007113    0.132468    0.689355   -31.00000   -1.20000
H33D  2   -0.048361    0.216394    0.668230   -31.00000   -1.20000
AFIX   0
C34'  1    0.068558    0.232335    0.678063   -31.00000    0.09362    0.10649 =
         0.10815    0.00262    0.00304   -0.03596
AFIX  23
H34C  2    0.105039    0.200698    0.695526   -31.00000   -1.20000
H34D  2    0.091337    0.239271    0.656709   -31.00000   -1.20000
AFIX   0
C35'  1    0.050436    0.326151    0.691729   -31.00000    0.13988    0.13133 =
         0.13414    0.01619    0.00858   -0.02697
AFIX  23
H35C  2    0.017758    0.359904    0.673401   -31.00000   -1.20000
H35D  2    0.097410    0.361116    0.697987   -31.00000   -1.20000
AFIX   0
C36'  1    0.010583    0.316321    0.723737   -31.00000    0.13589    0.13465 =
         0.12218    0.02015    0.02376   -0.04257
AFIX  23
H36C  2    0.047814    0.305287    0.744661   -31.00000   -1.20000
H36D  2   -0.024741    0.264487    0.720673   -31.00000   -1.20000
AFIX   0
C37'  1   -0.032552    0.405925    0.727691   -31.00000    0.14674    0.13829 =
         0.11973    0.01471    0.03400   -0.02599
AFIX  23
H37C  2   -0.045383    0.436590    0.705034   -31.00000   -1.20000
H37D  2   -0.079435    0.393668    0.737176   -31.00000   -1.20000
AFIX   0
PART 0
C38   1    0.046983    0.538576    0.740170    11.00000    0.09538    0.07612 =
         0.09209   -0.00161    0.03683    0.00262
C39   1    0.110343    0.573984    0.760082    11.00000    0.09042    0.07457 =
         0.08280   -0.00146    0.00970   -0.00139
AFIX  43
H39   2    0.132963    0.543716    0.780478    11.00000   -1.20000
AFIX   0
C40   1    0.140524    0.655079    0.749678    11.00000    0.07804    0.07268 =
         0.06887   -0.00531   -0.00092    0.01179
AFIX  43
H40   2    0.184320    0.679166    0.763190    11.00000   -1.20000
AFIX   0
C41   1    0.108020    0.702049    0.719827    11.00000    0.04954    0.07635 =
         0.06213   -0.00350    0.01222    0.01313
C42   1    0.043449    0.666080    0.701304    11.00000    0.05885    0.10183 =
         0.08081    0.00165    0.00526   -0.00345
AFIX  43
H42   2    0.019411    0.697022    0.681339    11.00000   -1.20000
AFIX   0
C43   1    0.012812    0.585079    0.711364    11.00000    0.06499    0.10813 =
         0.09570    0.00033    0.01254   -0.02125
AFIX  43
H43   2   -0.031846    0.561798    0.698303    11.00000   -1.20000
AFIX   0
C44   1    0.144716    0.788251    0.710446    11.00000    0.05146    0.08075 =
         0.05948   -0.00621    0.00179    0.01044
AFIX  23
H44A  2    0.135719    0.836102    0.727119    11.00000   -1.20000
H44B  2    0.199545    0.778156    0.712990    11.00000   -1.20000
AFIX   0
C45   1    0.084203    0.911747    0.671765    11.00000    0.04944    0.07962 =
         0.07151   -0.01208    0.00495    0.01922
AFIX  23
H45A  2    0.042754    0.914545    0.685688    11.00000   -1.20000
H45B  2    0.062859    0.922849    0.647274    11.00000   -1.20000
AFIX   0
C46   1    0.140912    0.984152    0.683825    11.00000    0.05484    0.07178 =
         0.07452   -0.00203    0.00545    0.01717
C47   1    0.141434    1.030354    0.715423    11.00000    0.06862    0.08473 =
         0.08058   -0.01013    0.00743    0.01050
AFIX  43
H47   2    0.102770    1.018070    0.728789    11.00000   -1.20000
AFIX   0
C48   1    0.195930    1.092601    0.727599    11.00000    0.08526    0.09754 =
         0.08473   -0.01105    0.00685   -0.00198
AFIX  43
H48   2    0.193923    1.123477    0.748773    11.00000   -1.20000
AFIX   0
C49   1    0.253181    1.109993    0.709098    11.00000    0.06738    0.08660 =
         0.08202   -0.00163   -0.01466    0.00662
C50   1    0.254740    1.068324    0.677110    11.00000    0.06543    0.07969 =
         0.09481    0.02152    0.00634    0.01218
AFIX  43
H50   2    0.293127    1.082237    0.663775    11.00000   -1.20000
AFIX   0
C51   1    0.197315    1.004364    0.664932    11.00000    0.06231    0.06714 =
         0.07883    0.00594    0.00233    0.00708
AFIX  43
H51   2    0.198020    0.975109    0.643328    11.00000   -1.20000
AFIX   0
C52   1    0.362765    1.201875    0.704203    11.00000    0.07056    0.10843 =
         0.10271    0.01432   -0.01049   -0.00065
AFIX  23
H52A  2    0.380150    1.263622    0.711511    11.00000   -1.20000
H52B  2    0.342152    1.204380    0.679268    11.00000   -1.20000
AFIX   0
C53   1    0.428680    1.138232    0.709296    11.00000    0.09344    0.10627 =
         0.08336    0.01446    0.00639    0.00175
AFIX  23
H53A  2    0.448606    1.133983    0.734270    11.00000   -1.20000
H53B  2    0.412064    1.076893    0.701084    11.00000   -1.20000
AFIX   0
C54   1    0.489723    1.170179    0.689968    11.00000    0.09968    0.11180 =
         0.09628    0.02575    0.01876    0.01992
AFIX  23
H54A  2    0.501132    1.234267    0.696342    11.00000   -1.20000
H54B  2    0.470131    1.168789    0.664911    11.00000   -1.20000
AFIX   0
C55   1    0.562206    1.117158    0.695907    11.00000    0.08476    0.11339 =
         0.13570    0.02206    0.03361    0.00511
AFIX  23
H55A  2    0.550902    1.051518    0.693380    11.00000   -1.20000
H55B  2    0.587603    1.127787    0.719842    11.00000   -1.20000
AFIX   0
C56   1    0.614927    1.144327    0.670447    11.00000    0.09203    0.08274 =
         0.14979    0.01237    0.02138   -0.01389
AFIX  23
H56A  2    0.587224    1.137523    0.646715    11.00000   -1.20000
H56B  2    0.626880    1.209581    0.673938    11.00000   -1.20000
AFIX   0
C57   1    0.687804    1.093247    0.672331    11.00000    0.10826    0.11789 =
         0.09428   -0.00474    0.00719    0.00353
AFIX  23
H57A  2    0.717317    1.101072    0.695640    11.00000   -1.20000
H57B  2    0.677125    1.027709    0.668796    11.00000   -1.20000
AFIX   0
C58   1    0.732969    1.125790    0.645683    11.00000    0.10646    0.08528 =
         0.10752   -0.01683    0.03534   -0.01935
AFIX  23
H58A  2    0.785727    1.107056    0.652922    11.00000   -1.20000
H58B  2    0.731844    1.192985    0.645497    11.00000   -1.20000
AFIX   0
C59   1    0.707774    1.091983    0.608368    11.00000    0.07095    0.06246 =
         0.09916   -0.00109    0.01984   -0.00598
AFIX  23
H59A  2    0.653260    1.101556    0.601356    11.00000   -1.20000
H59B  2    0.735085    1.124435    0.591929    11.00000   -1.20000
AFIX   0
C60   1    0.699399    0.946588    0.580375    11.00000    0.03341    0.06693 =
         0.07079    0.01066    0.00427   -0.00400
C61   1    0.711374    0.851888    0.583110    11.00000    0.04412    0.05839 =
         0.06749    0.01286    0.00396    0.00191
AFIX  43
H61   2    0.736946    0.826569    0.603962    11.00000   -1.20000
AFIX   0
C62   1    0.685889    0.796404    0.555480    11.00000    0.03397    0.05283 =
         0.07224    0.01766    0.00486   -0.00254
AFIX  43
H62   2    0.694249    0.732854    0.557683    11.00000   -1.20000
AFIX   0
C63   1    0.648470    0.830298    0.524591    11.00000    0.02775    0.05355 =
         0.07098    0.01397    0.00902    0.00075
C64   1    0.637371    0.924060    0.522115    11.00000    0.04625    0.05953 =
         0.07184    0.01791   -0.00260   -0.00113
AFIX  43
H64   2    0.611877    0.948784    0.501136    11.00000   -1.20000
AFIX   0
C65   1    0.662453    0.982290    0.549376    11.00000    0.04829    0.04855 =
         0.08298    0.01302    0.00364    0.00069
AFIX  43
H65   2    0.654506    1.045863    0.546922    11.00000   -1.20000
AFIX   0
C66   1    0.621847    0.766974    0.494223    11.00000    0.02747    0.05665 =
         0.07352    0.01592    0.00681   -0.00032
AFIX  23
H66A  2    0.656194    0.772356    0.476829    11.00000   -1.20000
H66B  2    0.623824    0.703449    0.502581    11.00000   -1.20000
AFIX   0
C71   1    0.485002    0.762061    0.492269    11.00000    0.03507    0.04476 =
         0.06158    0.00671    0.00556   -0.00550
C72   1    0.361328    0.754148    0.491949    11.00000    0.03208    0.04212 =
         0.05771    0.00709    0.00426   -0.00196
C73   1    0.437495    0.681890    0.532437    11.00000    0.03104    0.03524 =
         0.05740    0.00925    0.00077   -0.00210
C74   1    0.142581    0.317539    0.476062    11.00000    0.02736    0.04619 =
         0.05913    0.00506    0.00741   -0.00024
C75   1    0.138321    0.467974    0.483955    11.00000    0.02454    0.04158 =
         0.06813    0.00690   -0.00183   -0.00274
C76   1    0.218163    0.385987    0.519473    11.00000    0.02488    0.03621 =
         0.06128    0.00903    0.00532   -0.00007
C77   1    0.141162    0.777457    0.647986    11.00000    0.03717    0.06205 =
         0.06500    0.00233    0.00059   -0.00056
C78   1    0.142340    0.761534    0.591207    11.00000    0.02996    0.05293 =
         0.06203    0.00941    0.00276   -0.00103
C79   1    0.210701    0.670337    0.627500    11.00000    0.03638    0.05211 =
         0.06009    0.00426    0.00481   -0.00068
C80   1    0.230565    0.742950    0.490704    11.00000    0.02725    0.04232 =
         0.06000    0.01308    0.00037    0.00127
C81   1    0.198530    0.664848    0.475023    11.00000    0.03176    0.04599 =
         0.05557    0.01209    0.00286    0.00416
AFIX  43
H81   2    0.216535    0.637766    0.455813    11.00000   -1.20000
AFIX   0
C82   1    0.138190    0.628205    0.489101    11.00000    0.03013    0.03543 =
         0.06367    0.01032   -0.00867    0.00400
C83   1    0.109583    0.667816    0.516314    11.00000    0.02097    0.04558 =
         0.06314    0.01378   -0.00024    0.00254
AFIX  43
H83   2    0.067608    0.642295    0.524853    11.00000   -1.20000
AFIX   0
C84   1    0.143975    0.746152    0.530867    11.00000    0.02834    0.04459 =
         0.06200    0.00776    0.00035    0.00566
C85   1    0.204884    0.785438    0.518422    11.00000    0.03161    0.03958 =
         0.05553    0.00791   -0.00356    0.00375
AFIX  43
H85   2    0.227943    0.839096    0.528470    11.00000   -1.20000
AFIX   0
C86   1    0.386714    0.581498    0.570313    11.00000    0.02443    0.04555 =
         0.05588    0.01611   -0.00085   -0.00275
C87   1    0.361902    0.502316    0.552981    11.00000    0.02724    0.04279 =
         0.05245    0.00883   -0.00253    0.00008
AFIX  43
H87   2    0.385301    0.478996    0.534631    11.00000   -1.20000
AFIX   0
C88   1    0.300826    0.458678    0.563877    11.00000    0.02990    0.03722 =
         0.05656    0.01054   -0.00442   -0.00221
C89   1    0.267244    0.490362    0.590932    11.00000    0.02885    0.04714 =
         0.05788    0.01442    0.00101    0.00213
AFIX  43
H89   2    0.226278    0.459058    0.598188    11.00000   -1.20000
AFIX   0
C90   1    0.294833    0.568239    0.606951    11.00000    0.03609    0.05130 =
         0.05098    0.01332    0.00562    0.00488
C91   1    0.354911    0.616496    0.597468    11.00000    0.03214    0.04198 =
         0.05592    0.00955   -0.00383    0.00135
AFIX  43
H91   2    0.373046    0.670596    0.609060    11.00000   -1.20000
AFIX   0

C92   1    0.801311    0.827784    0.420755    11.00000    0.05587    0.05939 =
         0.08358    0.00955   -0.00693   -0.01025
AFIX  23
H92A  2    0.850842    0.856722    0.420719    11.00000   -1.20000
H92B  2    0.804066    0.791188    0.442149    11.00000   -1.20000
AFIX   0
CL1   5    0.732147    0.914010    0.421162    11.00000    0.05099    0.08212 =
         0.08664   -0.00379    0.00802   -0.00406
CL2   5    0.782325    0.755602    0.384763    11.00000    0.06138    0.07230 =
         0.07223    0.00649    0.00169    0.00192

PART 1
C93   1    0.774986    0.502901    0.299794    51.00000    0.09445    0.10053 =
         0.07246    0.00557    0.01621    0.00579
AFIX  23
H93A  2    0.798725    0.459006    0.317281    51.00000   -1.20000
H93B  2    0.811536    0.517048    0.284045    51.00000   -1.20000
AFIX   0

CL3   5    0.753736    0.600367    0.320179    51.00000    0.13105    0.07018 =
         0.10873    0.00181    0.04055    0.01412
CL4   5    0.694908    0.453355    0.275988    51.00000    0.09633    0.15262 =
         0.09119   -0.00672    0.00007   -0.00908
PART 0
PART 2
C93'  1    0.764455    0.506532    0.293745   -51.00000    0.09445    0.10053 =
         0.07246    0.00557    0.01621    0.00579
AFIX  23
H93C  2    0.756957    0.455476    0.309329   -51.00000   -1.20000
H93D  2    0.810015    0.494119    0.283227   -51.00000   -1.20000
AFIX   0
CL3'  5    0.775118    0.605846    0.316712   -51.00000    0.11306    0.11357 =
         0.16383    0.00789    0.03398   -0.02905
CL4'  5    0.687427    0.516647    0.261716   -51.00000    0.21552    0.17787 =
         0.13485   -0.00925    0.01677   -0.04288

PART 0
C94   1    0.058266    0.494758    0.576444    11.00000    0.04119    0.05914 =
         0.07745    0.00640   -0.00264   -0.00324
AFIX  23
H94A  2    0.100842    0.525582    0.568043    11.00000   -1.20000
H94B  2    0.011325    0.520671    0.563799    11.00000   -1.20000
AFIX   0
CL5   5    0.061607    0.377382    0.566907    11.00000    0.05109    0.05938 =
         0.13405    0.01125    0.00913    0.00595
CL6   5    0.062221    0.517106    0.621082    11.00000    0.07146    0.13434 =
         0.07841   -0.00196    0.00872   -0.02005

C95   1    0.495678    0.886611    0.584513    11.00000    0.08753    0.09847 =
         0.10133   -0.00033    0.02081   -0.01569
AFIX  23
H95A  2    0.536383    0.879929    0.570318    11.00000   -1.20000
H95B  2    0.489962    0.827687    0.596011    11.00000   -1.20000
AFIX   0
CL7   5    0.413603    0.911436    0.557763    11.00000    0.11046    0.09211 =
         0.12621   -0.02412   -0.02451    0.02137
CL8   5    0.521780    0.969428    0.616269    11.00000    0.10370    0.13348 =
         0.09823   -0.00580    0.00934   -0.03607

PART 1
CL9   5    0.435354    0.531622    0.467146    21.00000    0.12464    0.05576 =
         0.09715   -0.00315    0.04832    0.00936

CL10  5    0.295649    0.466301    0.430213    21.00000    0.05295    0.08523 =
         0.25469    0.02981    0.02979    0.02476
C96   1    0.392557    0.462489    0.434359    21.00000    0.05099    0.04297 =
         0.10659    0.00952    0.02031   -0.00407
AFIX  23
H96A  2    0.409532    0.399178    0.439053    21.00000   -1.20000
H96B  2    0.408261    0.481460    0.412243    21.00000   -1.20000
AFIX   0

PART 0
PART 2
CL11  5    0.355058    0.511482    0.461029   -21.00000    0.32466    0.22515 =
         0.07838    0.04161    0.05233    0.20417
CL12  5    0.315622    0.431979    0.395503   -21.00000    0.17941    0.17454 =
         0.13598    0.06050   -0.07142   -0.09961
C97   1    0.387861    0.448306    0.429253   -21.00000    0.06290    0.08107 =
         0.07183   -0.00147    0.01815    0.01828
AFIX  23
H97A  2    0.429776    0.480632    0.420887   -21.00000   -1.20000
H97B  2    0.406649    0.388937    0.438779   -21.00000   -1.20000
AFIX   0
HKLF 4

REM  r90428f in P2(1)/c
REM R1 =  0.1145 for   14405 Fo > 4sig(Fo)  and  0.1292 for all   17915 data
REM   1236 parameters refined using    293 restraints

END

WGHT      0.1963     13.9083

REM Instructions for potential hydrogen bonds
HTAB C9 Cl4
EQIV $1 x, -y+3/2, z-1/2
HTAB C14' O5_$1
EQIV $2 -x+1, y-1/2, -z+1/2
HTAB C14' Cl4'_$2
EQIV $3 x, y-1, z
HTAB C26 O9_$3
HTAB C87 Cl11
EQIV $4 -x+1, -y+1, -z+1
HTAB C92 N7_$4
HTAB C93 N10_$4
HTAB C93 O12_$4
HTAB C93' O12_$4
EQIV $5 -x, -y+1, -z+1
HTAB C94 N8_$5
HTAB C94 O8_$5
HTAB C96 N4_$4
HTAB C96 O10_$4
HTAB C97 N4_$4
HTAB C97 O10_$4

REM Highest difference peak  1.031,  deepest hole -0.798,  1-sigma level  0.087
Q1    1   0.1935  0.1692  0.3115  11.00000  0.05    1.03
Q2    1   0.6307  0.4950  0.2954  11.00000  0.05    0.96
Q3    1  -0.0008  0.2558  0.6861  11.00000  0.05    0.96
Q4    1   0.4473  0.2663  0.3395  11.00000  0.05    0.73
Q5    1   0.2415  0.2268  0.2959  11.00000  0.05    0.69
Q6    1  -0.0156  0.3951  0.7274  11.00000  0.05    0.69
Q7    1   0.2620  0.1416  0.2987  11.00000  0.05    0.64
Q8    1   0.5017  0.4636  0.3352  11.00000  0.05    0.63
Q9    1   0.7093  0.5161  0.2997  11.00000  0.05    0.62
Q10   1   0.3594  0.4003  0.3951  11.00000  0.05    0.61
Q11   1   0.3803  0.5324  0.4601  11.00000  0.05    0.59
Q12   1   0.5470  0.5931  0.3643  11.00000  0.05    0.58
Q13   1   0.6490  1.1430  0.6955  11.00000  0.05    0.57
Q14   1   0.5290  0.3760  0.3131  11.00000  0.05    0.53
Q15   1   0.6380  1.0974  0.6533  11.00000  0.05    0.52
;
_shelx_res_checksum               23447
_shelx_hkl_file
;
   0   0   4  216646    3301                                                      101129  -31.12    0.08  1.0000
   0   0  -4  213573    3227                                                       99033  -31.12   -0.08  1.0000
   0   0   6  146729    7271                                                      330616   40.51   -0.03  1.0000
   0   0  -6  135796    6905                                                      314099   40.51    0.03  1.0000
   0   0   8  358585    4920                                                      392284   -5.81    0.03  1.0000
   0   0   8  331007  129329                                                      363414   -5.81    0.03  1.0000
   0   0  -8  363230    4967                                                      397142   -5.81   -0.03  1.0000
   0   0  12   34885    4863                                                      115065  -32.18    0.03  1.0000
   0   0  12   33844    4711                                                      113169  -32.18    0.03  1.0000
   0   0 -12   37180    4991                                                      119204  -32.18   -0.03  1.0000
   0   0  14   90815    2917                                                       49651   16.58   -0.02  1.0000
   0   0  14   78959    2280                                                       40993   16.58   -0.02  1.0000
   0   0 -14   88154    2862                                                       47689   16.58    0.02  1.0000
   0   0  16   13484    1944                                                       22402    7.08   -0.06  1.0000
   0   0  16   12612    1863                                                       21274    7.08   -0.06  1.0000
   0   0 -16   12793    1964                                                       21508    7.08    0.06  1.0000
   0   0  18   31230    2107                                                       15307  -11.19    0.10  1.0000
   0   0  18   31972    2110                                                       15828  -11.19    0.10  1.0000
   0   0 -18   32801    2338                                                       16413  -11.19   -0.10  1.0000
   0   0  20  451515   10700                                                      468604   -2.66   -0.07  1.0000
   0   0 -20  456038   10554                                                      473211   -2.66    0.07  1.0000
   0   0  24    6348    1587                                                       12452   -6.74    0.04  1.0000
   0   0 -24    7036    2063                                                       13409   -6.74   -0.04  1.0000
   0   0  26   16542    2017                                                       12623    3.43   -0.10  1.0000
   0   0 -26   13395    1329                                                        9895    3.43    0.10  1.0000
   0   0  28     618     778                                                        1875    3.89    0.02  1.0000
   0   0 -28    1042     653                                                        2573    3.89   -0.02  1.0000
   0   0  30   60698    4285                                                       63037   -0.99    0.08  1.0000
   0   0 -30   63467    5024                                                       65858   -0.99   -0.08  1.0000
   0   0  32    2144    1200                                                        3649   -2.98    0.04  1.0000
   0   0 -32    3375     877                                                        5212   -2.98   -0.04  1.0000
   0   0  34   19205    1102                                                       17064   -1.68   -0.13  1.0000
   0   0 -34   19130    2208                                                       16993   -1.68    0.13  1.0000
   0   0  36    3485    3162                                                        4481    1.67    0.00  1.0000
   0   0 -36    2363    1017                                                        3194    1.67    0.00  1.0000
   0   0  38    1923     703                                                        1519    1.03   -0.01  1.0000
   0   0 -38    1737     599                                                        1354    1.03    0.01  1.0000
   0   0  40    1317     410                                                        1307   -0.03    0.01  1.0000
   0   0 -40     867     435                                                         859   -0.03   -0.01  1.0000
   0   0  42       2     691                                                        -124    0.28    0.16  1.0000
   0   0 -42     905     426                                                         858    0.28   -0.16  1.0000
   0   0  44    1193     465                                                         911   -0.93   -0.12  1.0000
   0   0 -44      20     492                                                         -78   -0.93    0.12  1.0000
   0   1  -1   91517    5945                                                      160942   20.82   -0.04  1.0000
   0   1  -2  176125    4725                                                      201276   -6.11   -0.12  1.0000
   0  -1   3  191253    3180                                                       67954  -37.29   -0.25  1.0000
   0   1   3  188935    3121                                                       66539  -37.30    0.05  1.0000
   0   1   3  191141    3178                                                       67851  -37.30    0.05  1.0000
   0   1  -3  193637    3247                                                       69378  -37.29    0.25  1.0000
   0   1  -3  184068    2984                                                       63699  -37.29    0.25  1.0000
   0  -1  -3  190958    3170                                                       67742  -37.30   -0.05  1.0000
   0  -1   4    6531     551                                                        1793    8.13   -0.19  1.0000
   0   1   4    4954     350                                                        1016   -8.13   -0.06  1.0000
   0   1   4    4470     335                                                         804   -8.13   -0.06  1.0000
   0   1  -4    6634     475                                                        1847    8.13    0.19  1.0000
   0   1  -4    6527     531                                                        1791    8.13    0.19  1.0000
   0  -1  -4    6350     472                                                        1696   -8.13    0.06  1.0000
   0  -1   5   20320    3467                                                       72324   26.68    0.10  1.0000
   0   1   5   21071    3535                                                       73769   26.69   -0.18  1.0000
   0   1   5   22384   27138                                                       76208   26.69   -0.18  1.0000
   0   1  -5   20065    3397                                                       71842   26.68   -0.10  1.0000
   0   1  -5   17291    3135                                                       66502   26.68   -0.10  1.0000
   0  -1  -5   18827    3271                                                       69515   26.69    0.18  1.0000
   0  -1   6    6643     809                                                        2728    6.18    0.06  1.0000
   0   1   6    5034     420                                                        1729   -6.20    0.22  1.0000
   0   1   6    7762     612                                                        3450   -6.20    0.22  1.0000
   0   1  -6    6252     669                                                        2479    6.18   -0.06  1.0000
   0   1  -6    5363     556                                                        1932    6.18   -0.06  1.0000
   0  -1  -6    6259     628                                                        2475   -6.20   -0.22  1.0000
   0  -1   7   29028    1595                                                        8325  -16.70    0.01  1.0000
   0   1   7   29021    1580                                                        8323  -16.70    0.10  1.0000
   0   1   7   29955    1665                                                        8827  -16.70    0.10  1.0000
   0   1  -7   26519    1336                                                        7008  -16.70   -0.01  1.0000
   0   1  -7   26828    1357                                                        7167  -16.70   -0.01  1.0000
   0  -1  -7   27955    1463                                                        7757  -16.70   -0.10  1.0000
   0  -1   8   92316    5150                                                      138158  -14.32   -0.08  1.0000
   0   1   8   96342    5324                                                      143081   14.33   -0.02  1.0000
   0   1   8   93441    5168                                                      139541   14.33   -0.02  1.0000
   0   1  -8   88519    4939                                                      133504  -14.32    0.08  1.0000
   0   1  -8   90823    5063                                                      136330  -14.32    0.08  1.0000
   0  -1  -8   90740    5051                                                      136236   14.33    0.02  1.0000
   0  -1   9  106675    4699                                                      111143    1.43    0.05  1.0000
   0   1   9  115578    5055                                                      120199    1.42    0.05  1.0000
   0   1   9  107429    4665                                                      111886    1.42    0.05  1.0000
   0   1  -9  100657    4373                                                      104999    1.43   -0.05  1.0000
   0   1  -9   97356   36171                                                      101627    1.43   -0.05  1.0000
   0  -1  -9  106918    4673                                                      111364    1.42   -0.05  1.0000
   0  -1  10    6364    2285                                                        6627    0.34    0.03  1.0000
   0   1  10   11782    1460                                                       12162   -0.37   -0.06  1.0000
   0   1  10   12775    1398                                                       13170   -0.37   -0.06  1.0000
   0   1 -10   10531    2066                                                       10869    0.34   -0.03  1.0000
   0   1 -10   13144    1767                                                       13521    0.34   -0.03  1.0000
   0  -1 -10   11730    1310                                                       12109   -0.37    0.06  1.0000
   0  -1  11  184914    5065                                                      134631   13.32    0.07  1.0000
   0   1  11  186453    5082                                                      135868   13.34    0.00  1.0000
   0   1  11  180737    4859                                                      130995   13.34    0.00  1.0000
   0   1 -11  168253    5015                                                      120472   13.32   -0.07  1.0000
   0   1 -11  184421    5184                                                      134210   13.32   -0.07  1.0000
   0  -1 -11  167574    5033                                                      119826   13.34    0.00  1.0000
   0  -1  12   97884    4919                                                      115973    5.84    0.04  1.0000
   0   1  12   91645    4610                                                      109028   -5.80   -0.01  1.0000
   0   1  12   99096    4888                                                      117142   -5.80   -0.01  1.0000
   0   1 -12   92593    4614                                                      110207    5.84   -0.04  1.0000
   0   1 -12  100249    5127                                                      118546    5.84   -0.04  1.0000
   0  -1 -12   91878    4585                                                      109283   -5.80    0.01  1.0000
   0  -1  13   78402    3159                                                       93230   -5.35    0.00  1.0000
   0   1  13   75956    3342                                                       90567   -5.35    0.05  1.0000
   0   1  13   83114    3233                                                       98369   -5.35    0.05  1.0000
   0   1 -13   71223    2824                                                       85386   -5.35    0.00  1.0000
   0   1 -13   80057    3741                                                       95034   -5.35    0.00  1.0000
   0  -1 -13   80661    3181                                                       95699   -5.35   -0.05  1.0000
   0  -1  14   44076    3152                                                       63609    8.92    0.09  1.0000
   0   1  14   40806    2905                                                       59675   -8.92   -0.09  1.0000
   0   1  14   46357    3145                                                       66351   -8.92   -0.09  1.0000
   0   1 -14   41997    2877                                                       61107    8.92   -0.09  1.0000
   0   1 -14   45163    3407                                                       64913    8.92   -0.09  1.0000
   0  -1 -14   41703    2950                                                       60759   -8.92    0.09  1.0000
   0  -1  15    9336     594                                                        1402  -12.99   -0.24  1.0000
   0   1  15    6759     236                                                         440  -13.01   -0.11  1.0000
   0   1  15    8371     175                                                         923  -13.01   -0.11  1.0000
   0   1 -15    7117     111                                                         605  -12.99    0.24  1.0000
   0   1 -15    7761     286                                                         814  -12.99    0.24  1.0000
   0  -1 -15   10055     448                                                        1541  -13.01    0.11  1.0000
   0  -1  16   19964     633                                                        3499  -17.34   -0.16  1.0000
   0   1  16   24135     855                                                        5358   17.34    0.03  1.0000
   0   1  16   21020     632                                                        3947   17.34    0.03  1.0000
   0   1 -16   15786     449                                                        1892  -17.34    0.16  1.0000
   0   1 -16   17083     664                                                        2358  -17.34    0.16  1.0000
   0  -1 -16   21675     639                                                        4234   17.34   -0.03  1.0000
   0  -1  17   10183     477                                                        1112   14.26    0.13  1.0000
   0   1  17    8541     286                                                         618   14.26    0.03  1.0000
   0   1 -17   11720     758                                                        1656   14.26   -0.13  1.0000
   0  -1 -17    8969     444                                                         737   14.26   -0.03  1.0000
   0  -1  18  207107    8485                                                      225783    4.24    0.09  1.0000
   0   1  18  180385    7229                                                      197984   -4.27    0.06  1.0000
   0   1  19   43091    4215                                                       46694   -1.79   -0.12  1.0000
   0   1  19   43382    3868                                                       46997   -1.79   -0.12  1.0000
   0   1 -19   34315    2752                                                       37537   -1.79    0.04  1.0000
   0   1 -19   41793    4588                                                       45341   -1.79    0.04  1.0000
   0  -1 -19   44847    4269                                                       48521   -1.79    0.12  1.0000
   0  -1  20     570     994                                                        4064    8.42    0.05  1.0000
   0   1  20     518     899                                                        3924   -8.42    0.02  1.0000
   0   1  20     555     805                                                        4025   -8.42    0.02  1.0000
   0   1 -20     571     745                                                        4068    8.42   -0.05  1.0000
   0   1 -20     809    1172                                                        4667    8.42   -0.05  1.0000
   0  -1 -20     604     909                                                        4156   -8.42   -0.02  1.0000
   0  -1  21    1229     348                                                         801   -1.44    0.12  1.0000
   0   1  21     455     323                                                         219   -1.41    0.23  1.0000
   0   1  21     407     169                                                         186   -1.41    0.23  1.0000
   0   1 -21     283     105                                                         101   -1.44   -0.12  1.0000
   0   1 -21      47     211                                                          -9   -1.44   -0.12  1.0000
   0  -1 -21     607     249                                                         329   -1.41   -0.23  1.0000
   0  -1  22       1     195                                                         177   -2.64   -0.15  1.0000
   0   1  22     163     401                                                         646    2.67    0.02  1.0000
   0   1  22       1     147                                                         140    2.67    0.02  1.0000
   0   1 -22       2     108                                                         128   -2.64    0.15  1.0000
   0   1 -22      75     308                                                         446   -2.64    0.15  1.0000
   0  -1 -22     220     297                                                         755    2.67   -0.02  1.0000
   0  -1  23   21487    2712                                                       28097   -4.44   -0.06  1.0000
   0   1  23   22171    2848                                                       28889   -4.45   -0.08  1.0000
   0   1  23   20493    1991                                                       26969   -4.45   -0.08  1.0000
   0   1 -23   18047    2326                                                       24142   -4.44    0.06  1.0000
   0   1 -23   21879    2301                                                       28545   -4.44    0.06  1.0000
   0  -1 -23   21292    2767                                                       27884   -4.45    0.08  1.0000
   0  -1  24   28279    2291                                                       22228   -4.03    0.06  1.0000
   0   1  24   28276    2209                                                       22264    4.00   -0.03  1.0000
   0   1  24   30437    2321                                                       24186    4.00   -0.03  1.0000
   0   1 -24   29683    2200                                                       23475   -4.03   -0.06  1.0000
   0   1 -24   32123    2819                                                       25650   -4.03   -0.06  1.0000
   0  -1 -24   33019    3007                                                       26493    4.00    0.03  1.0000
   0  -1  25   14894     655                                                       11891    2.74   -0.03  1.0000
   0   1  25   18251    6367                                                       14912    2.74   -0.06  1.0000
   0   1  25   16485    1247                                                       13320    2.74   -0.06  1.0000
   0   1 -25   16489    2203                                                       13320    2.74    0.03  1.0000
   0  -1 -25   18612    1501                                                       15239    2.74    0.06  1.0000
   0  -1  26   25375    2297                                                       24459   -0.61   -0.01  1.0000
   0   1  26   22696    3176                                                       21794    0.64    0.01  1.0000
   0   1 -26   25910    2011                                                       24985   -0.61    0.01  1.0000
   0  -1 -26   26236    2504                                                       25265    0.64   -0.01  1.0000
   0  -1  27   15498    1624                                                       12113    3.05    0.05  1.0000
   0   1  27   17302    2318                                                       13712    3.05   -0.02  1.0000
   0   1 -27   12964    1407                                                        9886    3.05   -0.05  1.0000
   0  -1 -27   17049    1620                                                       13487    3.05    0.02  1.0000
   0  -1  28   61678    3699                                                       68814    2.95    0.07  1.0000
   0  -1 -28   61983    3901                                                       69175   -2.97    0.15  1.0000
   0  -1  29    6170    1192                                                        4450   -2.50   -0.06  1.0000
   0   1  29    6145    1406                                                        4416   -2.52    0.13  1.0000
   0   1 -29    5237    2889                                                        3664   -2.50    0.06  1.0000
   0  -1 -29    5811    1140                                                        4133   -2.52   -0.13  1.0000
   0  -1  30   69047    4329                                                       69631    0.23   -0.06  1.0000
   0   1  30   66592    4758                                                       67141   -0.22    0.10  1.0000
   0   1 -30   68824    3904                                                       69407    0.23    0.06  1.0000
   0  -1 -30   59920    5732                                                       60441   -0.22   -0.10  1.0000
   0  -1  31  116633    6686                                                      115232   -0.43    0.09  1.0000
   0   1 -31  118432    6385                                                      117020   -0.43   -0.09  1.0000
   0  -1 -31  116777    6824                                                      115459   -0.41    0.15  1.0000
   0  -1  32    5621    1124                                                        4564   -1.57    0.02  1.0000
   0   1  32    3402     937                                                        2600    1.55    0.03  1.0000
   0   1 -32    5467    1095                                                        4425   -1.57   -0.02  1.0000
   0  -1 -32    5742    1210                                                        4684    1.55   -0.03  1.0000
   0  -1  33    6878    1294                                                        7649    0.96   -0.09  1.0000
   0   1  33    5131     914                                                        5780    0.93    0.10  1.0000
   0   1 -33    3786     945                                                        4363    0.96    0.09  1.0000
   0  -1 -33    5587    3588                                                        6263    0.93   -0.10  1.0000
   0  -1  34      36     687                                                         -52    1.27    0.10  1.0000
   0   1  34      36     652                                                        -770   -1.26    0.11  1.0000
   0   1 -34     228     348                                                         445    1.27   -0.10  1.0000
   0  -1 -34      36     497                                                        -564   -1.26   -0.11  1.0000
   0  -1  35   20925    3127                                                       20609    0.23   -0.22  1.0000
   0   1  35   22456    1472                                                       22064    0.28    0.10  1.0000
   0   1 -35   20636    3096                                                       20322    0.23    0.22  1.0000
   0  -1 -35   20392    2949                                                       20018    0.28   -0.10  1.0000
   0  -1  36    3210    1083                                                        2975   -0.45   -0.24  1.0000
   0   1  36    1825     733                                                        1647    0.45   -0.19  1.0000
   0   1 -36    1190     598                                                        1048   -0.45    0.24  1.0000
   0  -1 -36    2267     790                                                        2068    0.45    0.19  1.0000
   0  -1  37   25667    2633                                                       27508   -1.19    0.34  1.0000
   0   1  37   26232    4524                                                       28145   -1.22   -0.17  1.0000
   0   1 -37   27687    4692                                                       29598   -1.19   -0.34  1.0000
   0  -1 -37   25646    4595                                                       27538   -1.22    0.17  1.0000
   0  -1  38    1931     639                                                        1909   -0.05    0.18  1.0000
   0   1  38    1890     605                                                        1870    0.05    0.14  1.0000
   0   1 -38    2398     788                                                        2374   -0.05   -0.18  1.0000
   0  -1 -38    2691    1029                                                        2667    0.05   -0.14  1.0000
   0  -1  39      72     313                                                          31    0.59    0.37  1.0000
   0   1  39     278     333                                                         192    0.59   -0.31  1.0000
   0   1 -39     680     531                                                         543    0.59   -0.37  1.0000
   0  -1 -39     614     539                                                         483    0.59    0.31  1.0000
   0  -1  40    1576     372                                                        1341   -0.65   -0.11  1.0000
   0   1  40    1116     621                                                         920    0.65   -0.14  1.0000
   0   1 -40    1178     714                                                         976   -0.65    0.11  1.0000
   0  -1 -40    1085     417                                                         892    0.65    0.14  1.0000
   0   1  41      13     625                                                         -80    0.43    0.62  1.0000
   0  -1  41      16     526                                                        -455    0.41   -0.74  1.0000
   0   1 -41     481     399                                                         506    0.41    0.74  1.0000
   0  -1 -41      13     445                                                        -117    0.43   -0.62  1.0000
   0  -1  42    1151     610                                                        1396    0.72    0.06  1.0000
   0   1  42     527     728                                                         695   -0.72    0.04  1.0000
   0   1 -42     314     423                                                         447    0.72   -0.06  1.0000
   0  -1 -42      12     438                                                        -612   -0.72   -0.04  1.0000
   0  -1  43       5     664                                                         -47   -0.47    0.12  1.0000
   0   1  43     459     376                                                         565   -0.49   -0.15  1.0000
   0   1 -43     590     404                                                         704   -0.47   -0.12  1.0000
   0  -1 -43     209     363                                                         282   -0.49    0.15  1.0000
   0  -1  44    6855    1450                                                        7001    0.19    0.06  1.0000
   0   1  44    3804    1262                                                        3910   -0.18    0.06  1.0000
   0   1 -44    2417    1246                                                        2504    0.19   -0.06  1.0000
   0  -1 -44    4168    1682                                                        4279   -0.18   -0.06  1.0000
   0  -1  45       3     572                                                        -220   -0.34    0.19  1.0000
   0   1  45     313     374                                                         262   -0.33   -0.18  1.0000
   0   1 -45    1284     547                                                        1177   -0.34   -0.19  1.0000
   0  -1 -45     234     368                                                         190   -0.33    0.18  1.0000
   0  -2   0  201250    6563                                                      177431    5.78   -0.04  1.0000
   0   2   0  229421    4870                                                      203938    5.78    0.04  1.0000
   0   2   0  205824    6725                                                      181727    5.78    0.04  1.0000
   0  -2   1  962992    1579                                                        8189  188.03    0.20  1.0000
   0   2   1 1015048    1729                                                       13593 -188.05    0.02  1.0000
   0   2  -1 1004965    1380                                                       12466  188.03   -0.20  1.0000
   0   2   1  948647    1367                                                        6902 -188.05    0.02  1.0000
   0   2  -1  952677    1384                                                        7263  188.03   -0.20  1.0000
   0  -2   2  180179    6780                                                      183480   -0.82    0.04  1.0000
   0   2   2  186265    4485                                                      189633   -0.82    0.10  1.0000
   0   2  -2  199131    4910                                                      202601   -0.82   -0.04  1.0000
   0   2  -2  189292    4584                                                      192675   -0.82   -0.04  1.0000
   0  -2  -2  192711    4625                                                      196137   -0.82   -0.10  1.0000
   0  -2   3   39650     621                                                        5602  -26.23   -0.09  1.0000
   0   2   3   42418    1541                                                        6656   26.25    0.08  1.0000
   0   2   3   40535    1163                                                        5923   26.25    0.08  1.0000
   0   2  -3   39936     821                                                        5710  -26.23    0.09  1.0000
   0   2  -3   38612     556                                                        5216  -26.23    0.09  1.0000
   0  -2  -3   39330     677                                                        5468   26.25   -0.08  1.0000
   0  -2   4  133244    5871                                                      158778   -7.06   -0.03  1.0000
   0   2   4  126112    5602                                                      150991   -7.06   -0.06  1.0000
   0   2   4  135971    6004                                                      161762   -7.06   -0.06  1.0000
   0   2  -4  147579    6463                                                      174393   -7.06    0.03  1.0000
   0   2  -4  133068    5878                                                      158586   -7.06    0.03  1.0000
   0  -2  -4  126869    5620                                                      151820   -7.06    0.06  1.0000
   0  -2   5      30    2977                                                       37922  -42.26    0.02  1.0000
   0   2  -5      38    3005                                                       37666  -42.26   -0.02  1.0000
   0  -2  -5      70    2904                                                       36795   42.25   -0.09  1.0000
   0  -2   7  142238    6018                                                      160887    5.06   -0.02  1.0000
   0   2   7  136162    5829                                                      154328   -5.03   -0.05  1.0000
   0   2   7  135332    5725                                                      153444   -5.03   -0.05  1.0000
   0   2  -7  144310    6073                                                      163090    5.06    0.02  1.0000
   0   2  -7  137747    5810                                                      156108    5.06    0.02  1.0000
   0  -2  -7  132647    5585                                                      150585   -5.03    0.05  1.0000
   0  -2   8  475642    6281                                                      502388   -4.04   -0.08  1.0000
   0   2   8  475631    6350                                                      502443   -4.05   -0.01  1.0000
   0   2   8  460326    6191                                                      486709   -4.05   -0.01  1.0000
   0   2  -8  458406    6063                                                      484669   -4.04    0.08  1.0000
   0   2  -8  455409    6040                                                      481587   -4.04    0.08  1.0000
   0  -2   9   46683    2851                                                       47232    0.27   -0.06  1.0000
   0   2   9   51950    3296                                                       52586   -0.29   -0.07  1.0000
   0   2   9   52419    3090                                                       53058   -0.29   -0.07  1.0000
   0   2  -9   46150    2985                                                       46696    0.27    0.06  1.0000
   0   2  -9   45204    2727                                                       45744    0.27    0.06  1.0000
   0  -2  -9   48418    2789                                                       49032   -0.29    0.07  1.0000
   0   2 -10  831027   10013                                                      803646    3.20   -0.07  1.0000
   0  -2  11   40761    2288                                                        9072   22.51    0.01  1.0000
   0   2  11   44911    2733                                                       11085  -22.51   -0.03  1.0000
   0   2  11   40165    1809                                                        8794  -22.51   -0.03  1.0000
   0   2 -11   36740    1698                                                        7230   22.51   -0.01  1.0000
   0   2 -11   37823    1955                                                        7715   22.51   -0.01  1.0000
   0  -2 -11   37167    1561                                                        7422  -22.51    0.03  1.0000
   0  -2  12     967     153                                                         449    2.09   -0.03  1.0000
   0   2  12     846     154                                                         371    2.08   -0.09  1.0000
   0   2  12    1211     224                                                         624    2.08   -0.09  1.0000
   0   2 -12    1063     114                                                         515    2.09    0.03  1.0000
   0   2 -12    1013     169                                                         480    2.09    0.03  1.0000
   0  -2 -12    1233     154                                                         640    2.08    0.09  1.0000
   0  -2  13      70    1726                                                       16319  -25.19    0.06  1.0000
   0   2  13     478    1880                                                       19938   25.19    0.04  1.0000
   0   2  13     332    1635                                                       18920   25.19    0.04  1.0000
   0   2 -13     416    1674                                                       19532  -25.19   -0.06  1.0000
   0   2 -13     611    1841                                                       20758  -25.19   -0.06  1.0000
   0  -2 -13     467    1700                                                       19869   25.19   -0.04  1.0000
   0  -2  14    9088    1744                                                       18641   -8.70   -0.12  1.0000
   0   2  14   12782    2499                                                       23789   -8.69    0.12  1.0000
   0   2  14   10455    1784                                                       20571   -8.69    0.12  1.0000
   0   2 -14   11793    2128                                                       22440   -8.70    0.12  1.0000
   0   2 -14   10187    1829                                                       20201   -8.70    0.12  1.0000
   0  -2 -14   11144    1844                                                       21534   -8.69   -0.12  1.0000
   0  -2  15  298396    6450                                                      265805    6.48    0.04  1.0000
   0   2  15  289174    5715                                                      257058   -6.49   -0.03  1.0000
   0   2 -15  289180    5676                                                      257111    6.48   -0.04  1.0000
   0   2 -15  288456    5818                                                      256428    6.48   -0.04  1.0000
   0  -2  16  167856    7617                                                      184818    4.26    0.09  1.0000
   0   2  16  149558    6289                                                      165547    4.25    0.05  1.0000
   0   2  16  147415    6084                                                      163291    4.25    0.05  1.0000
   0   2 -16  153759    6429                                                      170011    4.26   -0.09  1.0000
   0  -2 -16  152000    6593                                                      168115    4.25   -0.05  1.0000
   0  -2  17    7053    2953                                                       16954    9.76   -0.06  1.0000
   0   2  17    6377    2225                                                       15857   -9.72    0.20  1.0000
   0   2  17    8013    2563                                                       18383   -9.72    0.20  1.0000
   0   2 -17    5411    2004                                                       14349    9.76    0.06  1.0000
   0   2 -17   10444    4025                                                       22030    9.76    0.06  1.0000
   0  -2 -17    7116    2296                                                       17011   -9.72   -0.20  1.0000
   0  -2  18    9278    1672                                                       11475    2.28   -0.04  1.0000
   0   2  18    9674    1551                                                       11945    2.31    0.00  1.0000
   0   2  18   12815    2236                                                       15411    2.31    0.00  1.0000
   0   2 -18    8492    1403                                                       10599    2.28    0.04  1.0000
   0   2 -18    8436    1978                                                       10536    2.28    0.04  1.0000
   0  -2 -18   11451    1913                                                       13912    2.31    0.00  1.0000
   0  -2  19   38562    2385                                                       31411   -4.04    0.06  1.0000
   0   2  19   38513    2388                                                       31388    4.03   -0.15  1.0000
   0   2  19   41244    2538                                                       33858    4.03   -0.15  1.0000
   0   2 -19   37355    2292                                                       30323   -4.04   -0.06  1.0000
   0   2 -19   36907    2465                                                       29919   -4.04   -0.06  1.0000
   0  -2 -19   42609    2681                                                       35096    4.03    0.15  1.0000
   0  -2  20   41296    3516                                                       40227    0.56    0.10  1.0000
   0   2  20   40558    3619                                                       39532    0.54   -0.05  1.0000
   0   2  20   40351    3327                                                       39328    0.54   -0.05  1.0000
   0   2 -20   38556    2762                                                       37523    0.56   -0.10  1.0000
   0   2 -20   41117    3492                                                       40050    0.56   -0.10  1.0000
   0  -2 -20   39838    3351                                                       38821    0.54    0.05  1.0000
   0  -2  21    1084    1074                                                        3504   -5.54   -0.15  1.0000
   0   2  21    1362     953                                                        3986    5.54   -0.08  1.0000
   0   2  21    1198     907                                                        3701    5.54   -0.08  1.0000
   0   2 -21     311     656                                                        1927   -5.54    0.15  1.0000
   0   2 -21     363     810                                                        2055   -5.54    0.15  1.0000
   0  -2 -21    1172     858                                                        3655    5.54    0.08  1.0000
   0  -2  22   23430    1998                                                       17858   -4.10    0.02  1.0000
   0   2  22   24182    1824                                                       18516   -4.10   -0.04  1.0000
   0   2  22   23668    1714                                                       18067   -4.10   -0.04  1.0000
   0   2 -22   22536    1541                                                       17079   -4.10   -0.02  1.0000
   0   2 -22   21887    1771                                                       16514   -4.10   -0.02  1.0000
   0  -2 -22   22751    1578                                                       17267   -4.10    0.04  1.0000
   0  -2  23     615     758                                                        2806    5.94    0.06  1.0000
   0   2  23    2125     948                                                        5511   -5.94    0.02  1.0000
   0   2  23    1617    1094                                                        4672   -5.94    0.02  1.0000
   0   2 -23     567     862                                                        2701    5.94   -0.06  1.0000
   0   2 -23     529    1029                                                        2618    5.94   -0.06  1.0000
   0  -2 -23    2062     947                                                        5410   -5.94   -0.02  1.0000
   0  -2  24   34213    2179                                                       37105    1.62   -0.10  1.0000
   0   2  24   34309    2326                                                       37198    1.61    0.09  1.0000
   0   2  24   30376    2143                                                       33098    1.61    0.09  1.0000
   0   2 -24   31520    2186                                                       34298    1.62    0.10  1.0000
   0   2 -24   36522    2289                                                       39508    1.62    0.10  1.0000
   0  -2 -24   28847    2299                                                       31501    1.61   -0.09  1.0000
   0  -2  25   17680    1911                                                       12442   -4.52    0.07  1.0000
   0   2  25   22257    2482                                                       16342    4.51    0.01  1.0000
   0   2  25   16920     949                                                       11821    4.51    0.01  1.0000
   0   2 -25   17061    1911                                                       11924   -4.52   -0.07  1.0000
   0  -2 -25   15278    1575                                                       10455    4.51   -0.01  1.0000
   0  -2  26   45087    3476                                                       48785    1.80    0.04  1.0000
   0   2 -26   45240    2953                                                       48944    1.80   -0.04  1.0000
   0  -2 -26   49598    3353                                                       53512    1.82    0.26  1.0000
   0  -2  27    3277     794                                                        2926   -0.67    0.07  1.0000
   0   2  27    5838    1112                                                        5360    0.68    0.12  1.0000
   0   2 -27    3949    2162                                                        3562   -0.67   -0.07  1.0000
   0  -2 -27    4750     902                                                        4320    0.68   -0.12  1.0000
   0  -2  28   12299    1593                                                       10536   -1.74   -0.06  1.0000
   0   2  28   15933    2065                                                       13911   -1.75    0.21  1.0000
   0   2 -28   11657    1442                                                        9942   -1.74    0.06  1.0000
   0  -2 -28   13114    6681                                                       11286   -1.75   -0.21  1.0000
   0  -2  29    5831    1074                                                        4238    2.38   -0.16  1.0000
   0   2  29    7139     752                                                        5356   -2.39   -0.01  1.0000
   0   2 -29    6150    1142                                                        4510    2.38    0.16  1.0000
   0  -2 -29    6514     771                                                        4817   -2.39    0.01  1.0000
   0  -2  30     122     486                                                         129   -0.07    0.10  1.0000
   0   2  30     922     513                                                         949   -0.09    0.06  1.0000
   0   2 -30     451     515                                                         465   -0.07   -0.10  1.0000
   0  -2 -30     312     275                                                         328   -0.09   -0.06  1.0000
   0  -2  31   30772    2336                                                       27053    2.31    0.02  1.0000
   0   2  31   25834    3109                                                       22463   -2.29   -0.10  1.0000
   0   2 -31   32802    2550                                                       28958    2.31   -0.02  1.0000
   0  -2 -31   26567    2589                                                       23147   -2.29    0.10  1.0000
   0  -2  32    9564    1389                                                        9825   -0.28   -0.11  1.0000
   0   2  32    8985    1315                                                        9225   -0.26    0.09  1.0000
   0   2 -32    9574    1490                                                        9835   -0.28    0.11  1.0000
   0  -2 -32    8587    1166                                                        8821   -0.26   -0.09  1.0000
   0  -2  33     566     359                                                         751   -0.76    0.04  1.0000
   0   2  33     906     673                                                        1138    0.77   -0.01  1.0000
   0   2 -33     203     240                                                         319   -0.76   -0.04  1.0000
   0  -2 -33     319     326                                                         462    0.77    0.01  1.0000
   0  -2  34    9769    1414                                                        8510    1.39    0.06  1.0000
   0   2  34    9858    1746                                                        8581    1.40   -0.09  1.0000
   0   2 -34    9701    1413                                                        8446    1.39   -0.06  1.0000
   0  -2 -34    8764    1189                                                        7562    1.40    0.09  1.0000
   0  -2  35    9582    1538                                                        7833   -1.98    0.13  1.0000
   0   2  35    9901    1261                                                        8127    1.98    0.16  1.0000
   0   2 -35   10430    1412                                                        8602   -1.98   -0.13  1.0000
   0  -2 -35    7318    1020                                                        5805    1.98   -0.16  1.0000
   0  -2  36    1092     626                                                        1282   -0.58   -0.28  1.0000
   0   2  36    1996     718                                                        2243   -0.57    0.02  1.0000
   0   2 -36    2388     858                                                        2667   -0.58    0.28  1.0000
   0  -2 -36    1437     733                                                        1648   -0.57   -0.02  1.0000
   0  -2  37     447     508                                                         579   -0.61   -0.32  1.0000
   0   2  37     304     388                                                         410    0.59   -0.39  1.0000
   0   2 -37     305     334                                                         415   -0.61    0.32  1.0000
   0  -2 -37    1274     547                                                        1487    0.59    0.39  1.0000
   0  -2  38     127     435                                                         241   -0.46    0.98  1.0000
   0   2  38      19     585                                                        -669   -0.51   -0.77  1.0000
   0   2 -38     346     470                                                         528   -0.46   -0.98  1.0000
   0  -2 -38     273     357                                                         412   -0.51    0.77  1.0000
   0  -2  39      30     526                                                         -28    1.15    0.11  1.0000
   0   2  39      30     596                                                        -421   -1.14    0.23  1.0000
   0   2 -39      17     315                                                           2    1.15   -0.11  1.0000
   0  -2 -39      30     427                                                        -197   -1.14   -0.23  1.0000
   0  -2  40      55     526                                                        -437    1.19   -1.01  1.0000
   0   2  40    1420     617                                                        1056    1.22    1.07  1.0000
   0   2 -40     323     471                                                         153    1.19    1.01  1.0000
   0  -2 -40    1148     391                                                         820    1.22   -1.07  1.0000
   0  -2  41     955     354                                                         995   -0.11    0.36  1.0000
   0   2  41     242     499                                                         259    0.09    0.47  1.0000
   0   2 -41     321     556                                                         343   -0.11   -0.36  1.0000
   0  -2 -41       5     450                                                        -373    0.09   -0.47  1.0000
   0  -2  42      41     665                                                        -167   -1.35    0.15  1.0000
   0   2  42      22     311                                                         121   -1.35   -0.22  1.0000
   0   2 -42     975     497                                                        1415   -1.35   -0.15  1.0000
   0  -2 -42      42     442                                                        -289   -1.35    0.22  1.0000
   0  -2  43     441     452                                                         576    0.49   -0.46  1.0000
   0   2  43      15     730                                                        -383   -0.48   -0.67  1.0000
   0   2 -43      10     546                                                        -158    0.49    0.46  1.0000
   0  -2 -43     230     388                                                         352   -0.48    0.67  1.0000
   0  -2  44    1216     453                                                        1227   -0.03    0.14  1.0000
   0   2  44       0     723                                                        -419   -0.04   -0.14  1.0000
   0   2 -44    1010     534                                                        1020   -0.03   -0.14  1.0000
   0  -2 -44     443     349                                                         452   -0.04    0.14  1.0000
   0  -2  45     815     741                                                         687   -0.51    0.20  1.0000
   0   2  45       8     634                                                         -72    0.53    0.24  1.0000
   0   2 -45     862     398                                                         730   -0.51   -0.20  1.0000
   0  -2 -45     831     549                                                         697    0.53   -0.24  1.0000
   0   3  -1  445948    7519                                                      605094   23.24    0.00  1.0000
   0  -3   2  285355    5813                                                      468955   31.79   -0.04  1.0000
   0  -3   3   50272    6881                                                      186146  -43.74    0.27  1.0000
   0   3   3   48514    6768                                                      182739  -43.74   -0.01  1.0000
   0   3   3   57267    4758                                                      199385  -43.74   -0.01  1.0000
   0   3  -3   64073    5168                                                      211930  -43.74   -0.27  1.0000
   0   3  -3   58569    4778                                                      201820  -43.74   -0.27  1.0000
   0  -3  -3   55694    4643                                                      196441  -43.74    0.01  1.0000
   0  -3   4  238686    5037                                                      405328  -31.26   -0.05  1.0000
   0   3  -4  246488    5259                                                      415477  -31.26    0.05  1.0000
   0   3  -4  237003    5058                                                      403135  -31.26    0.05  1.0000
   0  -3  -4  238828    5075                                                      405511   31.26   -0.08  1.0000
   0  -3   5  286365    4850                                                      389201   18.73   -0.31  1.0000
   0   3   5  265861  129953                                                      365154   18.71    0.06  1.0000
   0   3  -5  285128    4976                                                      387758   18.73    0.31  1.0000
   0   3  -5  292223    4999                                                      396025   18.73    0.31  1.0000
   0  -3  -5  283640    4841                                                      385940   18.71   -0.06  1.0000
   0  -3   7  367233    6709                                                      302732   11.78    0.15  1.0000
   0   3   7  365329    6762                                                      301050   11.77   -0.06  1.0000
   0   3   7  357195    6846                                                      293671   11.77   -0.06  1.0000
   0   3  -7  376773    6905                                                      311399   11.78   -0.15  1.0000
   0  -3  -7  358194    6572                                                      294577   11.77    0.06  1.0000
   0  -3   8  312081    6301                                                      286071   -5.02    0.12  1.0000
   0   3   8  325772    6714                                                      299237    5.01    0.05  1.0000
   0   3   8  311632    6358                                                      285692    5.01    0.05  1.0000
   0   3  -8  302209    6130                                                      276623   -5.02   -0.12  1.0000
   0  -3  -8  305696    6180                                                      280010    5.01   -0.05  1.0000
   0  -3   9    8034    1583                                                       18204   -9.56   -0.06  1.0000
   0   3   9    8436    1667                                                       18791   -9.55   -0.06  1.0000
   0   3   9    8808    1733                                                       19344   -9.55   -0.06  1.0000
   0   3  -9    7881    1712                                                       17974   -9.56    0.06  1.0000
   0   3  -9    7002    1828                                                       16632   -9.56    0.06  1.0000
   0  -3  -9    9409    1893                                                       20230   -9.55    0.06  1.0000
   0  -3  10  234147    5877                                                      263620   -6.24   -0.04  1.0000
   0   3  10  233991    6050                                                      263529    6.25   -0.12  1.0000
   0   3  10  224987    5660                                                      253969    6.25   -0.12  1.0000
   0   3 -10  234882    5840                                                      264400   -6.24    0.04  1.0000
   0   3 -10  231263    5841                                                      260559   -6.24    0.04  1.0000
   0  -3 -10  209449   84503                                                      237443    6.25    0.12  1.0000
   0  -3  11    1177    1124                                                        2992   -4.30    0.03  1.0000
   0   3  11    1220     511                                                        3043   -4.27    0.04  1.0000
   0   3  11     965     669                                                        2632   -4.27    0.04  1.0000
   0   3 -11     694     722                                                        2185   -4.30   -0.03  1.0000
   0   3 -11    1724     593                                                        3833   -4.30   -0.03  1.0000
   0  -3 -11    1222     486                                                        3046   -4.27   -0.04  1.0000
   0  -3  12  121963    3018                                                       90388   10.26    0.10  1.0000
   0   3  12  135668   36386                                                      102217  -10.26    0.12  1.0000
   0   3 -12  127072    3240                                                       94794   10.26   -0.10  1.0000
   0   3 -12  122922    3039                                                       91214   10.26   -0.10  1.0000
   0  -3 -12  124282    3154                                                       92367  -10.26   -0.12  1.0000
   0  -3  13   48235    2652                                                       47137   -0.53    0.05  1.0000
   0   3  13   49978    2813                                                       48814   -0.55    0.08  1.0000
   0   3 -13   51766    2939                                                       50628   -0.53   -0.05  1.0000
   0   3 -13   49786    2866                                                       48670   -0.53   -0.05  1.0000
   0  -3 -13   48893    2864                                                       47742   -0.55   -0.08  1.0000
   0  -3  14   14996    1738                                                       15525    0.45    0.03  1.0000
   0   3  14   17074    1576                                                       17644   -0.46    0.11  1.0000
   0   3  14   16562    1957                                                       17123   -0.46    0.11  1.0000
   0   3 -14   15546    1763                                                       16085    0.45   -0.03  1.0000
   0   3 -14   17931    1844                                                       18509    0.45   -0.03  1.0000
   0  -3 -14   17218    1594                                                       17790   -0.46   -0.11  1.0000
   0  -3  15    9268     519                                                        1474   12.22   -0.04  1.0000
   0   3  15    8571     632                                                        1210   12.20   -0.19  1.0000
   0   3  15    9342     388                                                        1510   12.20   -0.19  1.0000
   0   3 -15    7176     157                                                         720   12.22    0.04  1.0000
   0   3 -15    6196     356                                                         434   12.22    0.04  1.0000
   0  -3 -15    9070     404                                                        1402   12.20    0.19  1.0000
   0  -3  16   20628    1366                                                        7950  -11.50   -0.21  1.0000
   0   3  16   21898    1736                                                        8732   11.51   -0.16  1.0000
   0   3  16   19987    1225                                                        7541   11.51   -0.16  1.0000
   0   3 -16   17965     872                                                        6332  -11.50    0.21  1.0000
   0   3 -16   20864    1598                                                        8097  -11.50    0.21  1.0000
   0  -3 -16   18093    1251                                                        6396   11.51    0.16  1.0000
   0  -3  17    1787    1296                                                        5979   -7.40   -0.08  1.0000
   0   3  17     985    1146                                                        4424   -7.41    0.14  1.0000
   0   3  17    1075    1024                                                        4611   -7.41    0.14  1.0000
   0   3 -17    1946     923                                                        6268   -7.40    0.08  1.0000
   0   3 -17    2310    1730                                                        6908   -7.40    0.08  1.0000
   0  -3 -17    1843    1151                                                        6093   -7.41   -0.14  1.0000
   0  -3  18   34345    2292                                                       19841    9.39    0.02  1.0000
   0   3  18   33418    2718                                                       19153   -9.37   -0.02  1.0000
   0   3  18   33949   10206                                                       19555   -9.37   -0.02  1.0000
   0   3 -18   32857    2561                                                       18714    9.39   -0.02  1.0000
   0   3 -18   35599    2090                                                       20797    9.39   -0.02  1.0000
   0  -3 -18   34098    1943                                                       19668   -9.37    0.02  1.0000
   0  -3  19    4216    2263                                                       10016   -7.42    0.00  1.0000
   0   3  19    5712    1632                                                       12214   -7.37    0.03  1.0000
   0   3 -19    4410    1875                                                       10314   -7.42    0.00  1.0000
   0  -3 -19    6056    1661                                                       12715   -7.37   -0.03  1.0000
   0  -3  20   97405    4893                                                      109484   -3.97    0.05  1.0000
   0   3  20  100001    4990                                                      112133    3.93    0.09  1.0000
   0   3 -20   90191    4408                                                      101827   -3.97   -0.05  1.0000
   0   3 -20  100679    4997                                                      112953   -3.97   -0.05  1.0000
   0  -3 -20   98271    4974                                                      110301    3.93   -0.09  1.0000
   0  -3  21   28973    1773                                                       16201    9.06    0.30  1.0000
   0   3  21   31148    2611                                                       17884    9.03   -0.06  1.0000
   0   3  21   29680    1868                                                       16776    9.03   -0.06  1.0000
   0   3 -21   20872    1673                                                       10310    9.06   -0.30  1.0000
   0   3 -21   26770    2435                                                       14565    9.06   -0.30  1.0000
   0  -3 -21   27389    1800                                                       15065    9.03    0.06  1.0000
   0  -3  22   24245    1968                                                       17759    4.74    0.13  1.0000
   0   3  22   24423    1753                                                       17945   -4.71   -0.03  1.0000
   0   3  22   25260    2004                                                       18663   -4.71   -0.03  1.0000
   0   3 -22   21719    1381                                                       15607    4.74   -0.13  1.0000
   0   3 -22   22405    2388                                                       16189    4.74   -0.13  1.0000
   0  -3 -22   26597    2260                                                       19815   -4.71    0.03  1.0000
   0  -3  23       4     388                                                         -74   -0.13   -0.39  1.0000
   0   3  23     146     199                                                         138   -0.10    0.13  1.0000
   0   3  23       1     210                                                        -181   -0.10    0.13  1.0000
   0   3 -23     137     119                                                         151   -0.13    0.39  1.0000
   0   3 -23       4     474                                                        -107   -0.13    0.39  1.0000
   0  -3 -23      28     166                                                          24   -0.10   -0.13  1.0000
   0  -3  24    8676    1270                                                       12368   -3.81   -0.15  1.0000
   0   3  24    7374    1537                                                       10774    3.78   -0.04  1.0000
   0   3  24    7485     693                                                       10908    3.78   -0.04  1.0000
   0   3 -24    7612     568                                                       11091   -3.81    0.15  1.0000
   0   3 -24    8631    1200                                                       12314   -3.81    0.15  1.0000
   0  -3 -24    6749     838                                                       10015    3.78    0.04  1.0000
   0  -3  25    7154    1451                                                        6285   -1.12    0.16  1.0000
   0   3  25    6367    1357                                                        5557   -1.11   -0.23  1.0000
   0   3  25    5122    1005                                                        4398   -1.11   -0.23  1.0000
   0   3 -25    7192    1345                                                        6321   -1.12   -0.16  1.0000
   0  -3 -25    5721    1151                                                        4955   -1.11    0.23  1.0000
   0  -3  26    1491     825                                                        2088   -1.49    0.11  1.0000
   0   3  26     644     679                                                        1056    1.50    0.02  1.0000
   0   3  26    2054     710                                                        2750    1.50    0.02  1.0000
   0   3 -26    2517     828                                                        3278   -1.49   -0.11  1.0000
   0  -3 -26    1836     671                                                        2497    1.50   -0.02  1.0000
   0  -3  27     914     520                                                        1493   -1.77   -0.05  1.0000
   0   3  27    1107     527                                                        1750   -1.81   -0.06  1.0000
   0   3  27    1006     496                                                        1622   -1.81   -0.06  1.0000
   0   3 -27     730     667                                                        1255   -1.77    0.05  1.0000
   0  -3 -27    1017     595                                                        1637   -1.81    0.06  1.0000
   0  -3  28    1219     236                                                         245    4.07   -0.11  1.0000
   0   3  28     918     313                                                         122   -4.06   -0.01  1.0000
   0   3 -28     373     515                                                         -20    4.07    0.11  1.0000
   0  -3 -28    1250     309                                                         259   -4.06    0.01  1.0000
   0  -3  29     569     450                                                         585    0.22    0.19  1.0000
   0   3  29     860     578                                                         886    0.21    0.20  1.0000
   0   3 -29     987     786                                                        1009    0.22   -0.19  1.0000
   0  -3 -29    1466     720                                                        1500    0.21   -0.20  1.0000
   0  -3  30    4453     855                                                        2939   -2.64    0.04  1.0000
   0   3  30    3013     771                                                        1791    2.65    0.09  1.0000
   0   3 -30    3563     844                                                        2225   -2.64   -0.04  1.0000
   0  -3 -30    4039     844                                                        2600    2.65   -0.09  1.0000
   0  -3  31     467     449                                                         759    1.24   -0.20  1.0000
   0   3  31      35     575                                                        -204    1.24    0.06  1.0000
   0   3 -31     975     557                                                        1381    1.24    0.20  1.0000
   0  -3 -31      35     421                                                        -900    1.24   -0.06  1.0000
   0  -3  32       7     453                                                        -375    0.53    0.13  1.0000
   0   3  32       7     565                                                        -428   -0.53    0.08  1.0000
   0   3 -32     984     461                                                         833    0.53   -0.13  1.0000
   0  -3 -32       7     448                                                        -759   -0.53   -0.08  1.0000
   0  -3  33    4233     976                                                        3743   -0.82    0.00  1.0000
   0   3  33    2933     938                                                        2539   -0.80   -0.07  1.0000
   0  -3 -33    4034    1048                                                        3570   -0.80    0.07  1.0000
   0  -3  34     299     402                                                         345   -0.27    0.05  1.0000
   0   3  34     439     441                                                         491    0.25   -0.04  1.0000
   0  -3 -34     409     392                                                         459    0.25    0.04  1.0000
   0  -3  35   16896    2952                                                       17554    0.53   -0.01  1.0000
   0   3  35   17776    2737                                                       18437    0.52   -0.03  1.0000
   0   3 -35   20167    2748                                                       20885    0.53    0.01  1.0000
   0  -3 -35   15195    2136                                                       15807    0.52    0.03  1.0000
   0  -3  36    9385    1469                                                        8587    0.89   -0.47  1.0000
   0   3  36   10344    6454                                                        9499   -0.90   -0.42  1.0000
   0   3 -36   10402    1536                                                        9561    0.89    0.47  1.0000
   0  -3 -36    9545    1156                                                        8733   -0.90    0.42  1.0000
   0  -3  37    1133     656                                                        1036   -0.31   -0.07  1.0000
   0   3  37    1148     496                                                        1051   -0.31    0.12  1.0000
   0   3 -37       2     689                                                        -286   -0.31    0.07  1.0000
   0  -3 -37     375     372                                                         320   -0.31   -0.12  1.0000
   0  -3  38    6233    1338                                                        6742   -0.67   -0.33  1.0000
   0   3  38    6906    1257                                                        7429    0.65   -0.27  1.0000
   0   3 -38    7614    1361                                                        8176   -0.67    0.33  1.0000
   0  -3 -38    5970    1581                                                        6457    0.65    0.27  1.0000
   0  -3  39     377     448                                                         458    0.31    0.64  1.0000
   0   3  39       9     643                                                        -335    0.29   -0.58  1.0000
   0   3 -39      11     754                                                         -62    0.31   -0.64  1.0000
   0  -3 -39       9     451                                                        -457    0.29    0.58  1.0000
   0  -3  40     284     403                                                         665    0.88    1.70  1.0000
   0   3  40      60     387                                                         264   -0.82    1.64  1.0000
   0   3 -40      83     609                                                        -363    0.88   -1.70  1.0000
   0  -3 -40     158     448                                                         445   -0.82   -1.64  1.0000
   0  -3  41     884     304                                                         961   -0.21   -0.81  1.0000
   0   3  41     582     587                                                         630   -0.17    0.69  1.0000
   0   3 -41     271     361                                                         308   -0.21    0.81  1.0000
   0  -3 -41     476     430                                                         519   -0.17   -0.69  1.0000
   0  -3  42      44     521                                                        -287   -0.81   -1.15  1.0000
   0   3  42      60     388                                                         207    0.77   -1.19  1.0000
   0   3 -42      83     466                                                         247   -0.81    1.15  1.0000
   0  -3 -42     650     560                                                        1034    0.77    1.19  1.0000
   0  -3  43    1557     559                                                        1593   -0.10    0.18  1.0000
   0   3  43    1455     572                                                        1498   -0.12   -0.09  1.0000
   0   3 -43    2690    1064                                                        2738   -0.10   -0.18  1.0000
   0  -3 -43    2340     884                                                        2394   -0.12    0.09  1.0000
   0  -3  44    1594     706                                                        1553    0.11   -0.24  1.0000
   0   3  44    1242     775                                                        1205   -0.11   -0.12  1.0000
   0   3 -44    1645     496                                                        1603    0.11    0.24  1.0000
   0  -3 -44    1088     882                                                        1054   -0.11    0.12  1.0000
   0  -3  45    1249     644                                                        1155    0.29    0.20  1.0000
   0   3  45       3     475                                                         -69    0.28   -0.24  1.0000
   0   3 -45    1329     561                                                        1232    0.29   -0.20  1.0000
   0  -3 -45     936     456                                                         857    0.28    0.24  1.0000
   0  -4   0  289560    1683                                                        8297  -94.36   -0.03  1.0000
   0   4   0  268760     998                                                        5098  -94.36    0.03  1.0000
   0  -4   1   39573    2743                                                       49026   -4.75   -0.02  1.0000
   0   4   1   33508    2717                                                       42207    4.73   -0.03  1.0000
   0   4   1   34303    2514                                                       43099    4.73   -0.03  1.0000
   0   4  -1   36520    2770                                                       45621   -4.75    0.02  1.0000
   0  -4   2  433436    9227                                                      745103   43.24    0.05  1.0000
   0   4   2  520449  305369                                                      858077   43.25    0.09  1.0000
   0   4  -2  528692  309090                                                      868526   43.24   -0.05  1.0000
   0   4   2  456428    9639                                                      775276   43.25    0.09  1.0000
   0   4  -2  478690   10014                                                      804087   43.24   -0.05  1.0000
   0  -4   3   10586    1970                                                       10005    0.60   -0.16  1.0000
   0   4   3   13537    1758                                                       12903   -0.58    0.06  1.0000
   0   4  -3   13080    1702                                                       12433    0.60    0.16  1.0000
   0  -4   4   52394    3303                                                      100999   18.77    0.15  1.0000
   0   4   4   55766    4425                                                      105657   18.76   -0.01  1.0000
   0   4  -4   49431    3343                                                       96869   18.77   -0.15  1.0000
   0   4  -4   59681    4782                                                      111025   18.77   -0.15  1.0000
   0  -4  -4   61695    4787                                                      113762   18.76    0.01  1.0000
   0  -4   5    2163     618                                                        2493    0.72    0.13  1.0000
   0   4   5    2173     692                                                        2502   -0.72   -0.12  1.0000
   0   4   5    2940     574                                                        3321   -0.72   -0.12  1.0000
   0   4  -5    1868     710                                                        2176    0.72   -0.13  1.0000
   0  -4  -5    1240     512                                                        1492   -0.72    0.12  1.0000
   0  -4   6     269     454                                                        3215   -8.51   -0.19  1.0000
   0   4  -6       1     637                                                        1716   -8.51    0.19  1.0000
   0  -4  -6     155     721                                                        2795   -8.53    0.09  1.0000
   0  -4   7  757170    9551                                                      769642    1.51    0.09  1.0000
   0   4   7  784147    9985                                                      796695   -1.49    0.02  1.0000
   0   4  -7  773364    9833                                                      785968    1.51   -0.09  1.0000
   0  -4  -7  744101    9424                                                      756326   -1.49   -0.02  1.0000
   0  -4   8  254290    4649                                                      195627  -13.08    0.03  1.0000
   0   4   8  278342    5498                                                      216878  -13.06    0.01  1.0000
   0   4  -8  240152    9282                                                      183252  -13.08   -0.03  1.0000
   0   4  -8  259279    4839                                                      200006  -13.08   -0.03  1.0000
   0  -4  -8  254745    4859                                                      196110  -13.06   -0.01  1.0000
   0  -4   9  565352    6526                                                      521383   -6.30   -0.14  1.0000
   0   4   9  585316    7010                                                      540772    6.27   -0.01  1.0000
   0   4   9  584643    6886                                                      540125    6.27   -0.01  1.0000
   0   4  -9  556248    6481                                                      512642   -6.30    0.14  1.0000
   0  -4  -9  563348    6528                                                      519664    6.27    0.01  1.0000
   0  -4  10  195320    4712                                                      198190    0.68   -0.02  1.0000
   0   4  10  204347    4988                                                      207212    0.67   -0.04  1.0000
   0   4 -10  177697    6839                                                      180435    0.68    0.02  1.0000
   0  -4 -10  191269    4834                                                      194041    0.67    0.04  1.0000
   0  -4  11   64760    2661                                                       77428    5.02    0.09  1.0000
   0   4  11   87087   36210                                                      101719   -5.03   -0.04  1.0000
   0   4 -11   63185    4114                                                       75704    5.02   -0.09  1.0000
   0  -4 -11   64171    2678                                                       76812   -5.03    0.04  1.0000
   0  -4  12   24654     904                                                        5322   17.74    0.07  1.0000
   0   4  12   27063    1699                                                        6464   17.75    0.15  1.0000
   0   4  12   29504    1826                                                        7684   17.75    0.15  1.0000
   0   4 -12   20116     644                                                        3337   17.74   -0.07  1.0000
   0   4 -12   25161    1054                                                        5559   17.74   -0.07  1.0000
   0  -4 -12   27142    1596                                                        6503   17.75   -0.15  1.0000
   0  -4  13  348431    4981                                                      391166    7.42   -0.03  1.0000
   0   4  13  341292    4959                                                      383539   -7.41    0.12  1.0000
   0   4 -13  341770    5241                                                      384107    7.42    0.03  1.0000
   0   4 -13  336420    4893                                                      378434    7.42    0.03  1.0000
   0  -4 -13  342707    5146                                                      385039   -7.41   -0.12  1.0000
   0  -4  14  168195    8936                                                      236543  -16.09   -0.12  1.0000
   0   4  14  188963    9634                                                      260986  -16.08    0.02  1.0000
   0   4  14  209616  148414                                                      285164  -16.08    0.02  1.0000
   0   4 -14  164892    9153                                                      232623  -16.09    0.12  1.0000
   0   4 -14  193464    9777                                                      266345  -16.09    0.12  1.0000
   0  -4 -14  184087    9416                                                      255249  -16.08   -0.02  1.0000
   0  -4  15     553     414                                                         981  -11.57    0.05  1.0000
   0   4  15       2     935                                                        2913   11.58    0.18  1.0000
   0   4  15       5     696                                                        3230   11.58    0.18  1.0000
   0   4 -15     387     505                                                        1236  -11.57   -0.05  1.0000
   0  -4 -15      87     763                                                        2074   11.58   -0.18  1.0000
   0  -4  16  112798    4688                                                      111940    0.27    0.21  1.0000
   0   4  16  121810    5065                                                      120917    0.27   -0.11  1.0000
   0   4  16  121932    5154                                                      121039    0.27   -0.11  1.0000
   0   4 -16  115113    4799                                                      114247    0.27   -0.21  1.0000
   0  -4 -16  114506    4791                                                      113641    0.27    0.11  1.0000
   0  -4  17   27527    2255                                                       29459    1.21   -0.15  1.0000
   0   4 -17   31714    2546                                                       33786    1.21    0.15  1.0000
   0   4 -17   34502    3269                                                       36661    1.21    0.15  1.0000
   0  -4 -17   33625    2799                                                       35725   -1.19    0.36  1.0000
   0  -4  18   96166    4873                                                      111529    5.03   -0.04  1.0000
   0   4 -18   96317    4689                                                      111692    5.03    0.04  1.0000
   0  -4 -18  100725    4942                                                      116406    5.03    0.11  1.0000
   0  -4  19    1374     370                                                         912    1.45    0.14  1.0000
   0   4  19    2972     877                                                        2267   -1.46    0.20  1.0000
   0   4  19    4498     813                                                        3620   -1.46    0.20  1.0000
   0   4 -19    1689     487                                                        1172    1.45   -0.14  1.0000
   0  -4 -19    4004     779                                                        3178   -1.46   -0.20  1.0000
   0  -4  20    4238    1050                                                        6103    2.75   -0.17  1.0000
   0   4  20    5014    1107                                                        7006    2.72    0.11  1.0000
   0   4  20    4315    1046                                                        6175    2.72    0.11  1.0000
   0   4 -20    3776     746                                                        5546    2.75    0.17  1.0000
   0   4 -20    3449     911                                                        5148    2.75    0.17  1.0000
   0  -4 -20    2930    1143                                                        4492    2.72   -0.11  1.0000
   0  -4  21   10350    1682                                                       16171    5.37    0.00  1.0000
   0   4  21   11299    1726                                                       17343   -5.36   -0.13  1.0000
   0   4  21   12513    9060                                                       18839   -5.36   -0.13  1.0000
   0   4 -21   11168    1529                                                       17189    5.37    0.00  1.0000
   0   4 -21   14391    2077                                                       21139    5.37    0.00  1.0000
   0  -4 -21   11275    1554                                                       17313   -5.36    0.13  1.0000
   0  -4  22   74584    5068                                                       90948   -6.01    0.05  1.0000
   0   4  22   74414    4537                                                       90746   -6.01   -0.03  1.0000
   0   4 -22   70443    4329                                                       86369   -6.01   -0.05  1.0000
   0  -4 -22   76277    4901                                                       92802   -6.01    0.03  1.0000
   0  -4  23      35     311                                                         822   -4.80   -0.05  1.0000
   0   4  23     884     901                                                        2735    4.76    0.03  1.0000
   0   4  23     171     453                                                        1272    4.76    0.03  1.0000
   0   4 -23      50     330                                                         887   -4.80    0.05  1.0000
   0   4 -23     147     543                                                        1216   -4.80    0.05  1.0000
   0  -4 -23     488     705                                                        1995    4.76   -0.03  1.0000
   0  -4  24    8119    1026                                                       10818    2.93   -0.05  1.0000
   0   4  24    8649    1858                                                       11454    2.96    0.21  1.0000
   0   4  24    7126     993                                                        9690    2.96    0.21  1.0000
   0   4 -24    7954     811                                                       10627    2.93    0.05  1.0000
   0   4 -24    9998    1904                                                       12971    2.93    0.05  1.0000
   0  -4 -24    8297    1622                                                       11049    2.96   -0.21  1.0000
   0  -4  25    1997     766                                                        2904   -1.94   -0.12  1.0000
   0   4  25    2170     944                                                        3115    1.95   -0.20  1.0000
   0   4  25    1756     655                                                        2615    1.95   -0.20  1.0000
   0   4 -25    1964    1188                                                        2865   -1.94    0.12  1.0000
   0  -4 -25    2940     848                                                        4027    1.95    0.20  1.0000
   0  -4  26   60835    3720                                                       62600    0.75    0.08  1.0000
   0   4  26   54926    3149                                                       56615    0.75   -0.13  1.0000
   0   4  26   57722    3013                                                       59453    0.75   -0.13  1.0000
   0   4 -26   62365    3523                                                       64152    0.75   -0.08  1.0000
   0  -4 -26   59288    3290                                                       61042    0.75    0.13  1.0000
   0  -4  27      66     312                                                         744    4.46    0.18  1.0000
   0   4  27     447     647                                                        -694   -4.44    0.45  1.0000
   0   4  27     273     237                                                          31   -4.44    0.45  1.0000
   0   4 -27     446     591                                                        -176    4.46   -0.18  1.0000
   0  -4 -27     210     508                                                         817   -4.44   -0.45  1.0000
   0  -4  28   13554    1430                                                       15674   -1.85    0.15  1.0000
   0   4  28   11867    1941                                                       13866   -1.86   -0.13  1.0000
   0   4 -28   14882    2386                                                       17100   -1.85   -0.15  1.0000
   0  -4 -28   10789    1964                                                       12698   -1.86    0.13  1.0000
   0  -4  29   13014    1026                                                       14585   -1.41    0.00  1.0000
   0   4 -29   17274    2665                                                       19077   -1.41    0.00  1.0000
   0  -4 -29   14029    1757                                                       15652    1.41    0.09  1.0000
   0  -4  30    8817    1655                                                        9564   -0.82   -0.06  1.0000
   0   4  30    8803    1474                                                        9545   -0.82    0.03  1.0000
   0   4 -30    8187    1875                                                        8908   -0.82    0.06  1.0000
   0  -4  31   30596    3351                                                       32508   -1.14    0.03  1.0000
   0   4  31   26613    4123                                                       28434    1.16   -0.05  1.0000
   0   4 -31   26681    2727                                                       28468   -1.14   -0.03  1.0000
   0  -4  32     466     296                                                         236    1.31   -0.09  1.0000
   0   4  32     913     329                                                         579    1.30    0.09  1.0000
   0   4 -32     732     416                                                         434    1.31    0.09  1.0000
   0  -4 -32     725     348                                                         431    1.30   -0.09  1.0000
   0  -4  33     459     342                                                         514   -0.26    0.00  1.0000
   0   4  33    1170     532                                                        1255    0.26   -0.08  1.0000
   0   4 -33     610     626                                                         673   -0.26    0.00  1.0000
   0  -4 -33     615     373                                                         677    0.26    0.08  1.0000
   0  -4  34     513     533                                                         755    1.02   -0.08  1.0000
   0   4  34    1130     630                                                        1475    1.01    0.01  1.0000
   0   4 -34     652     471                                                         923    1.02    0.08  1.0000
   0  -4 -34    1133     524                                                        1479    1.01   -0.01  1.0000
   0  -4  35      51     420                                                        -123    1.51   -0.01  1.0000
   0   4  35     689     647                                                        1117   -1.52   -0.02  1.0000
   0   4 -35     233     423                                                         503    1.51    0.01  1.0000
   0  -4 -35     212     411                                                         473   -1.52    0.02  1.0000
   0  -4  36    1633     636                                                        1923   -0.72    0.12  1.0000
   0   4  36     604     567                                                         782   -0.71   -0.11  1.0000
   0   4 -36    1835     876                                                        2142   -0.72   -0.12  1.0000
   0  -4 -36    1318     642                                                        1576   -0.71    0.11  1.0000
   0  -4  37    2073     684                                                        1877   -0.48   -0.99  1.0000
   0   4  37    3968    1086                                                        3730    0.43   -0.88  1.0000
   0   4 -37    1958     684                                                        1767   -0.48    0.99  1.0000
   0  -4 -37    4896     665                                                        4633    0.43    0.88  1.0000
   0  -4  38    8515    1612                                                        9129   -0.69   -0.04  1.0000
   0   4  38    8971    1762                                                        9606   -0.70    0.12  1.0000
   0   4 -38    8343    1350                                                        8951   -0.69    0.04  1.0000
   0  -4 -38   11302    1337                                                       12013   -0.70   -0.12  1.0000
   0  -4  39      82     405                                                         -45   -0.64    1.80  1.0000
   0   4  39     983     686                                                        1637    0.69    1.80  1.0000
   0   4 -39     155     373                                                         462   -0.64   -1.80  1.0000
   0  -4 -39     108     340                                                         379    0.69   -1.80  1.0000
   0  -4  40    1623     471                                                        1524    0.26   -0.05  1.0000
   0   4  40    1403     596                                                        1301    0.29    0.06  1.0000
   0   4 -40     819     540                                                         749    0.26    0.05  1.0000
   0  -4 -40       2     462                                                         -53    0.29   -0.06  1.0000
   0  -4  41     255     202                                                         147    1.17   -0.86  1.0000
   0   4  41      42     603                                                        -839   -1.17   -0.70  1.0000
   0   4 -41      48     654                                                        -184    1.17    0.86  1.0000
   0  -4 -41      42     496                                                         -24   -1.17    0.70  1.0000
   0  -4  42    4715    3580                                                        4977    0.40    0.24  1.0000
   0   4  42    2160     880                                                        2329    0.38   -0.20  1.0000
   0   4 -42    6943    1236                                                        7261    0.40   -0.24  1.0000
   0  -4 -42    3328    1087                                                        3537    0.38    0.20  1.0000
   0  -4  43    1365     664                                                        1539   -0.48   -0.14  1.0000
   0   4  43     557     593                                                         667    0.46   -0.43  1.0000
   0   4 -43     281     371                                                         363   -0.48    0.14  1.0000
   0  -4 -43    1829    1050                                                        2027    0.46    0.43  1.0000
   0  -4  44     870     456                                                         881    0.03   -0.18  1.0000
   0   4  44       0     703                                                          -6    0.04    0.08  1.0000
   0   4 -44     561     310                                                         569    0.03    0.18  1.0000
   0  -4 -44     549     472                                                         559    0.04   -0.08  1.0000
   0  -5   1    9429    1684                                                       19818   -9.22    0.02  1.0000
   0   5  -1   14381    2295                                                       26763   -9.22   -0.02  1.0000
   0   5   1   16227    2562                                                       29310   -9.25   -0.09  1.0000
   0   5   1   10690    1924                                                       21671   -9.25   -0.09  1.0000
   0   5  -1   10131    1792                                                       20831   -9.22   -0.02  1.0000
   0  -5   2   47827     447                                                        1836   37.12   -0.03  1.0000
   0   5   2   46854     541                                                        1645  -37.13    0.11  1.0000
   0   5   2   51394     700                                                        2581  -37.13    0.11  1.0000
   0   5  -2   50665     592                                                        2425   37.12    0.03  1.0000
   0   5   2   52815     790                                                        2907  -37.13    0.11  1.0000
   0   5  -2   47954     574                                                        1861   37.12    0.03  1.0000
   0  -5   3    6056    8959                                                       25144   17.04   -0.12  1.0000
   0   5   3    7270    2251                                                       27551   17.04    0.06  1.0000
   0   5  -3    7732    2325                                                       28454   17.04    0.12  1.0000
   0   5   3    8303    2399                                                       29530   17.04    0.06  1.0000
   0   5  -3    6948    2216                                                       26929   17.04    0.12  1.0000
   0  -5   4    5142     558                                                        2185  -25.00    0.04  1.0000
   0   5   4    3940     525                                                        3091   24.98   -0.21  1.0000
   0   5  -4    4873     611                                                        2366  -25.00   -0.04  1.0000
   0  -5  -4    3576     785                                                        3430   24.98    0.21  1.0000
   0  -5   5   28471    2567                                                       46025   -9.67    0.09  1.0000
   0   5   5   28270    2587                                                       45765   -9.67   -0.11  1.0000
   0   5  -5   33587    2985                                                       52473   -9.67   -0.09  1.0000
   0   5  -5   30671    3047                                                       48811   -9.67   -0.09  1.0000
   0  -5  -5   29563    2716                                                       47406   -9.67    0.11  1.0000
   0  -5   6    9586    1686                                                       19393   -8.73   -0.05  1.0000
   0   5   6   10468    1887                                                       20648    8.73    0.12  1.0000
   0   5  -6   10152    1780                                                       20195   -8.73    0.05  1.0000
   0   5  -6   11038    1843                                                       21437   -8.73    0.05  1.0000
   0  -5  -6   10681    1905                                                       20947    8.73   -0.12  1.0000
   0  -5   7    7139    1237                                                        5996    1.49   -0.21  1.0000
   0   5  -7    7928    1497                                                        6721    1.49    0.21  1.0000
   0   5  -7   10441    1876                                                        9049    1.49    0.21  1.0000
   0  -5  -7    6807    1015                                                        5695    1.49    0.02  1.0000
   0  -5   8  133075    6472                                                      174397   11.15   -0.06  1.0000
   0   5  -8  130918    6400                                                      171926   11.15    0.06  1.0000
   0   5  -8  141678    6936                                                      184226   11.15    0.06  1.0000
   0  -5  -8  149195    4595                                                      192698  -11.13    0.00  1.0000
   0  -5   9   79721    2750                                                       83076    1.24    0.09  1.0000
   0   5  -9   76853    3222                                                       80148    1.24   -0.09  1.0000
   0   5  -9   86063    3177                                                       89547    1.24   -0.09  1.0000
   0  -5  -9   78281    2719                                                       81616    1.24   -0.02  1.0000
   0  -5  10   12193    1864                                                       21456    7.61    0.09  1.0000
   0   5  10   15236    2248                                                       25472   -7.63    0.13  1.0000
   0   5 -10   11810    1851                                                       20947    7.61   -0.09  1.0000
   0   5 -10   13269    2185                                                       22876    7.61   -0.09  1.0000
   0  -5 -10   12221    1902                                                       21525   -7.63   -0.13  1.0000
   0  -5  11   20248    2294                                                       16561   -2.87    0.23  1.0000
   0   5  11   12785    1330                                                        9906   -2.86    0.30  1.0000
   0   5 -11   22565    3235                                                       18663   -2.87   -0.23  1.0000
   0   5 -11   25401    2428                                                       21249   -2.87   -0.23  1.0000
   0  -5 -11   18856    2096                                                       15321   -2.86   -0.30  1.0000
   0   5  13  176070    7834                                                      181681    1.40   -0.08  1.0000
   0   5 -13  174532    8014                                                      180144    1.41    0.22  1.0000
   0  -5 -13  214353    8345                                                      220540    1.40    0.08  1.0000
   0   5  14  332954    7382                                                      301190    5.96    0.08  1.0000
   0   5 -14  312841  146752                                                      281920   -5.99   -0.14  1.0000
   0  -5 -14  342114    6890                                                      309905    5.96   -0.08  1.0000
   0  -5  15      66     336                                                         471    6.30   -0.01  1.0000
   0   5  15     206     836                                                        1938    6.33   -0.21  1.0000
   0   5 -15     120     315                                                         357    6.30    0.01  1.0000
   0  -5 -15       9     312                                                         792    6.33    0.21  1.0000
   0  -5  16   59690   41520                                                       79764    8.04   -0.01  1.0000
   0   5  16   57542    4153                                                       77196   -8.01    0.19  1.0000
   0   5 -16   49098    3604                                                       67440    8.04    0.01  1.0000
   0   5 -16   69010    4696                                                       90486    8.04    0.01  1.0000
   0  -5 -16   62524    4276                                                       82950   -8.01   -0.19  1.0000
   0   5  17  146028    7087                                                      189750  -11.29   -0.28  1.0000
   0   5  17  158902   97873                                                      204388  -11.29   -0.28  1.0000
   0   5 -17  140764    7056                                                      183590  -11.25   -0.38  1.0000
   0   5 -17  131682    6465                                                      173197  -11.25   -0.38  1.0000
   0  -5 -17  146483    7328                                                      190269  -11.29    0.28  1.0000
   0  -5  18    7642    1842                                                        9629    2.25   -0.37  1.0000
   0   5  18    6895    1792                                                        8800   -2.27   -0.38  1.0000
   0   5 -18    4047    1115                                                        5523    2.25    0.37  1.0000
   0  -5 -18    7860    1865                                                        9886   -2.27    0.38  1.0000
   0  -5  19    8975     766                                                        3200    8.06   -0.63  1.0000
   0   5  19    6118     692                                                        1603    8.06    0.52  1.0000
   0   5  19   10950     989                                                        4420    8.06    0.52  1.0000
   0   5 -19    9806     880                                                        3704    8.06    0.63  1.0000
   0  -5 -19   10144     949                                                        3913    8.06   -0.52  1.0000
   0  -5  20    1634    1074                                                        6233   -8.13    0.43  1.0000
   0   5  20    2234    1599                                                        7367    8.14    0.39  1.0000
   0   5  20    1621    1580                                                        6212    8.14    0.39  1.0000
   0   5 -20    1720     902                                                        6400   -8.13   -0.43  1.0000
   0   5 -20    2318    1389                                                        7512   -8.13   -0.43  1.0000
   0  -5 -20    2794    1624                                                        8358    8.14   -0.39  1.0000
   0  -5  21   12732    1333                                                        8638   -4.20    0.34  1.0000
   0   5  21   13583    4038                                                        9345   -4.20   -0.19  1.0000
   0   5  21   14653     718                                                       10236   -4.20   -0.19  1.0000
   0   5 -21   11876    1170                                                        7936   -4.20   -0.34  1.0000
   0   5 -21   14576    1315                                                       10168   -4.20   -0.34  1.0000
   0  -5 -21   14835    1351                                                       10388   -4.20    0.19  1.0000
   0  -5  22    2799     455                                                        1036    4.37    0.01  1.0000
   0   5  22    5049     818                                                        2542   -4.36   -0.07  1.0000
   0   5  22    5463    1344                                                        2838   -4.36   -0.07  1.0000
   0   5 -22    3298     459                                                        1348    4.37   -0.01  1.0000
   0   5 -22    4396     783                                                        2078    4.37   -0.01  1.0000
   0  -5 -22    5565     581                                                        2912   -4.36    0.07  1.0000
   0  -5  23    9861    1317                                                       11441    1.62    0.01  1.0000
   0   5  23    7027    1714                                                        8366    1.61    0.09  1.0000
   0   5  23    7082    1566                                                        8426    1.61    0.09  1.0000
   0   5 -23    7714    1188                                                        9118    1.62   -0.01  1.0000
   0   5 -23    9784    1518                                                       11358    1.62   -0.01  1.0000
   0  -5 -23    6397    1450                                                        7677    1.61   -0.09  1.0000
   0  -5  24     973     528                                                        1191   -0.69   -0.29  1.0000
   0   5  24     390     359                                                         522    0.65   -0.23  1.0000
   0   5 -24    1180     909                                                        1420   -0.69    0.29  1.0000
   0   5 -24     571     641                                                         740   -0.69    0.29  1.0000
   0  -5 -24    1973     808                                                        2259    0.65    0.23  1.0000
   0  -5  25   86771    3965                                                       92768    2.11    0.00  1.0000
   0   5  25   91306    5426                                                       97586    2.16   -0.08  1.0000
   0   5  25   92172    3931                                                       98481    2.16   -0.08  1.0000
   0  -5 -25   94180    4003                                                      100556    2.16    0.08  1.0000
   0  -5  26    2802    1114                                                        3332    1.01    0.01  1.0000
   0   5  26    5928    1067                                                        6679   -1.00    0.01  1.0000
   0   5  26    4221     739                                                        4858   -1.00    0.01  1.0000
   0   5 -26    1838     887                                                        2272    1.01   -0.01  1.0000
   0  -5 -26    4943     931                                                        5631   -1.00   -0.01  1.0000
   0  -5  27    9792    1226                                                       14217   -4.28    0.01  1.0000
   0   5  27    7981    1507                                                       12044   -4.31   -0.02  1.0000
   0   5  27    9915    1038                                                       14396   -4.31   -0.02  1.0000
   0   5 -27   12904    2441                                                       17922   -4.28   -0.01  1.0000
   0  -5 -27    8847    1818                                                       13102   -4.31    0.02  1.0000
   0  -5  28     512     479                                                         616   -0.46    0.16  1.0000
   0   5  28       5     632                                                        -288    0.46    0.18  1.0000
   0   5  28      26     179                                                          53    0.46    0.18  1.0000
   0   5 -28     479     406                                                         580   -0.46   -0.16  1.0000
   0  -5 -28     312     333                                                         395    0.46   -0.18  1.0000
   0  -5  29    5927     906                                                        3440    3.87   -0.08  1.0000
   0   5  29    4308     937                                                        2237    3.87    0.12  1.0000
   0   5 -29    3712     593                                                        1814    3.87    0.08  1.0000
   0  -5 -29    5056     820                                                        2784    3.87   -0.12  1.0000
   0  -5  30     622     465                                                         890   -1.03    0.07  1.0000
   0   5  30     707     583                                                         995    1.05    0.01  1.0000
   0   5 -30    1509     843                                                        1913   -1.03   -0.07  1.0000
   0  -5 -30     321     347                                                         523    1.05   -0.01  1.0000
   0  -5  31    1696     504                                                        1032   -1.91   -0.05  1.0000
   0   5 -31     510     523                                                         183   -1.91    0.05  1.0000
   0  -5 -31    2136     376                                                        1378   -1.92    0.06  1.0000
   0  -5  32    5548    1098                                                        4931    0.90    0.00  1.0000
   0   5  32    6314    1188                                                        5656   -0.90    0.03  1.0000
   0   5 -32    7158    1579                                                        6455    0.90    0.00  1.0000
   0  -5 -32    4943     906                                                        4363   -0.90   -0.03  1.0000
   0  -5  33    4905    1025                                                        5102    0.29    0.23  1.0000
   0   5  33    4188    1066                                                        4363    0.28   -0.25  1.0000
   0   5 -33    4709    1268                                                        4902    0.29   -0.23  1.0000
   0  -5 -33    4561    1107                                                        4743    0.28    0.25  1.0000
   0  -5  34    2026     591                                                        2066    0.09    0.04  1.0000
   0   5  34    1691     735                                                        1722   -0.08    0.01  1.0000
   0   5 -34     414     414                                                         432    0.09   -0.04  1.0000
   0  -5 -34     717     422                                                         737   -0.08   -0.01  1.0000
   0  -5  35    1940     523                                                        1823   -0.29   -0.06  1.0000
   0   5  35    2988    1989                                                        2846   -0.28    0.11  1.0000
   0   5 -35    1388     528                                                        1289   -0.29    0.06  1.0000
   0  -5 -35    3291    1002                                                        3142   -0.28   -0.11  1.0000
   0  -5  36       8     441                                                         -37   -0.37   -0.47  1.0000
   0   5  36    2044    1087                                                        1914    0.32   -0.39  1.0000
   0   5 -36    1243     428                                                        1125   -0.37    0.47  1.0000
   0  -5 -36    1634     462                                                        1518    0.32    0.39  1.0000
   0  -5  37    1736     727                                                        1875   -0.34    0.12  1.0000
   0   5  37    2127     961                                                        2275   -0.33    0.06  1.0000
   0   5 -37    1967     774                                                        2114   -0.34   -0.12  1.0000
   0  -5 -37    1666     601                                                        1797   -0.33   -0.06  1.0000
   0  -5  38     612     512                                                         619    0.03   -0.04  1.0000
   0   5  38    1576     645                                                        1573    0.01   -0.08  1.0000
   0   5 -38     607     424                                                         614    0.03    0.04  1.0000
   0  -5 -38    1983     654                                                        1980    0.01    0.08  1.0000
   0  -5  39    1298     494                                                        1475    0.44   -1.04  1.0000
   0   5  39    2030    1051                                                        2256    0.47    0.85  1.0000
   0   5 -39    2441    1124                                                        2690    0.44    1.04  1.0000
   0  -5 -39    1037     460                                                        1196    0.47   -0.85  1.0000
   0  -5  40    2065     655                                                        2113    0.06    1.04  1.0000
   0   5  40    2103     611                                                        2144   -0.05    0.94  1.0000
   0   5 -40    1004     558                                                        1030    0.06   -1.04  1.0000
   0  -5 -40    1768     542                                                        1804   -0.05   -0.94  1.0000
   0  -5  41    6391    1247                                                        7151    0.91    1.31  1.0000
   0   5  41    5001    1262                                                        5646    0.88   -1.26  1.0000
   0   5 -41    4924    1189                                                        5589    0.91   -1.31  1.0000
   0  -5 -41    4231    1552                                                        4823    0.88    1.26  1.0000
   0  -5  42      15     485                                                        -142   -0.36   -0.75  1.0000
   0   5  42     473     421                                                         465    0.34   -0.62  1.0000
   0   5 -42     894     712                                                         917   -0.36    0.75  1.0000
   0  -5 -42     268     456                                                         260    0.34    0.62  1.0000
   0  -5  43    2923     965                                                        3184   -0.50   -0.23  1.0000
   0   5  43     219     717                                                         297   -0.52    0.27  1.0000
   0   5 -43    2850    1290                                                        3108   -0.50    0.23  1.0000
   0  -5 -43     828     533                                                         975   -0.52   -0.27  1.0000
   0  -5  44     252     327                                                         347    0.58   -0.08  1.0000
   0   5  44     791     614                                                         954   -0.58   -0.14  1.0000
   0   5 -44      31     363                                                          69    0.58    0.08  1.0000
   0  -5 -44       8     489                                                        -507   -0.58    0.14  1.0000
   0  -6   0     530    1335                                                        6865   12.63   -0.07  1.0000
   0   6   0    2708    1808                                                       12514   12.63    0.07  1.0000
   0   6   0    1262    1870                                                        9090   12.63    0.07  1.0000
   0  -6   1    8709    2893                                                       61299  -32.56   -0.04  1.0000
   0   6   1    9446    2988                                                       63260   32.57    0.08  1.0000
   0   6  -1   11963    3323                                                       69507  -32.56    0.04  1.0000
   0   6   1   12309    3362                                                       70367   32.57    0.08  1.0000
   0   6   1   11762    3353                                                       69052   32.57    0.08  1.0000
   0   6  -1   12387    3396                                                       70523  -32.56    0.04  1.0000
   0  -6   2    6038    1625                                                        8521   -3.08    0.04  1.0000
   0   6   2    5844    1632                                                        8264   -3.05   -0.04  1.0000
   0   6   2   11161    1758                                                       14425   -3.05   -0.04  1.0000
   0   6  -2    4963    1394                                                        7234   -3.08   -0.04  1.0000
   0   6   2    5902    1789                                                        8332   -3.05   -0.04  1.0000
   0   6  -2    6667    1763                                                        9265   -3.08   -0.04  1.0000
   0  -6   3    7981    1180                                                        5981    2.53    0.18  1.0000
   0   6   3    7830    1202                                                        5822   -2.57    0.13  1.0000
   0   6   3   11428    1930                                                        8971   -2.57    0.13  1.0000
   0   6  -3   11222    2026                                                        8824    2.53   -0.18  1.0000
   0   6   3    6785     775                                                        4926   -2.57    0.13  1.0000
   0   6  -3    8853    1380                                                        6739    2.53   -0.18  1.0000
   0  -6   4   26558    1687                                                       15202   -8.37   -0.09  1.0000
   0   6   4   37254    2166                                                       23510   -8.38   -0.09  1.0000
   0   6   4   33366    2041                                                       20443   -8.38   -0.09  1.0000
   0   6  -4   30564    1679                                                       18267   -8.37    0.09  1.0000
   0  -6  -4   25442    1640                                                       14357   -8.38    0.09  1.0000
   0   6   5  118837    2998                                                       88265  -10.05   -0.16  1.0000
   0   6   5  122354    3110                                                       91300  -10.05   -0.16  1.0000
   0   6  -5  112914    2959                                                       83137   10.07   -0.01  1.0000
   0  -6  -5  120829    3026                                                       89983  -10.05    0.16  1.0000
   0  -6   6   41052    2750                                                       49300    4.10    0.11  1.0000
   0   6  -6   39097    2714                                                       47155    4.10   -0.11  1.0000
   0   6  -6   44373    3122                                                       52933    4.10   -0.11  1.0000
   0  -6  -6   45320    3308                                                       54000    4.11   -0.05  1.0000
   0  -6   7   53234    2821                                                       50159    1.43    0.04  1.0000
   0   6  -7   56379    3655                                                       53213    1.43   -0.04  1.0000
   0   6  -7   59056    3574                                                       55815    1.43   -0.04  1.0000
   0  -6  -7   57658    3136                                                       54585   -1.37   -0.02  1.0000
   0  -6   8  115610    5832                                                      139186    6.98   -0.08  1.0000
   0   6   8  120588    6125                                                      144486    6.94   -0.01  1.0000
   0   6  -8  114038   71562                                                      137461    6.98    0.08  1.0000
   0  -6  -8  121195    6106                                                      145151    6.94    0.01  1.0000
   0  -6   9    5425    1342                                                       10907   -6.50   -0.11  1.0000
   0   6   9    6912    6987                                                       12904    6.43   -0.05  1.0000
   0   6  -9    6025    2051                                                       11751   -6.50    0.11  1.0000
   0   6  -9    5916    1649                                                       11598   -6.50    0.11  1.0000
   0  -6  -9    5158    1285                                                       10461    6.43    0.05  1.0000
   0  -6  10   10551    2148                                                       22068   -9.68    0.12  1.0000
   0   6  10    9121    2213                                                       19990   -9.68    0.14  1.0000
   0   6  10    8615    2608                                                       19237   -9.68    0.14  1.0000
   0   6 -10    8894    1902                                                       19641   -9.68   -0.12  1.0000
   0  -6 -10    9888    2144                                                       21118   -9.68   -0.14  1.0000
   0  -6  11   32003    3260                                                       39012   -3.93   -0.15  1.0000
   0   6  11   33195    3640                                                       40373    3.95    0.12  1.0000
   0   6 -11   28599    2732                                                       35244   -3.93    0.15  1.0000
   0  -6 -11   32730    3390                                                       39860    3.95   -0.12  1.0000
   0  -6  12  185274    7058                                                      192745   -1.81   -0.06  1.0000
   0   6  12  168189    7386                                                      175219   -1.79   -0.11  1.0000
   0   6 -12  182789    7304                                                      190210   -1.81    0.06  1.0000
   0  -6 -12  172870    7614                                                      179996   -1.79    0.11  1.0000
   0  -6  13   22275    1325                                                        8652   11.87    0.12  1.0000
   0   6 -13   18506    1228                                                        6369   11.87   -0.12  1.0000
   0  -6 -13   18262    1244                                                        6236  -11.86    0.11  1.0000
   0  -6  14   17329    1552                                                        4515   13.60   -0.28  1.0000
   0   6 -14   17684    1050                                                        4697   13.60    0.28  1.0000
   0  -6 -14   19868    1076                                                        5826   13.64   -0.13  1.0000
   0  -6  15  138970    5837                                                      157176   -5.00    0.01  1.0000
   0   6  15  134358    6573                                                      152173    4.97    0.01  1.0000
   0   6 -15  135292    5810                                                      153263   -5.00   -0.01  1.0000
   0   6 -15  131436    5604                                                      149157   -5.00   -0.01  1.0000
   0  -6 -15  133289    5859                                                      151035    4.97   -0.01  1.0000
   0   6 -16      30     926                                                        1832   -7.89   -0.47  1.0000
   0  -6 -16      38     473                                                         987   -7.91    0.40  1.0000
   0   6 -17  137735    6057                                                      149924   -3.39   -0.04  1.0000
   0   6 -17  116767    5716                                                      128011   -3.39   -0.04  1.0000
   0  -6 -17  146130    6190                                                      158729    3.41   -0.03  1.0000
   0   6  18       0     372                                                         204   -2.84    0.44  1.0000
   0   6  18     585     718                                                        1429   -2.84    0.44  1.0000
   0   6 -18       1     193                                                         157   -2.85    0.30  1.0000
   0  -6 -18     188     290                                                         747   -2.84   -0.44  1.0000
   0   6  19  161934    4351                                                      162404    0.12    0.07  1.0000
   0   6  19  172838    4104                                                      173323    0.12    0.07  1.0000
   0   6 -19  167162    4922                                                      167692   -0.14   -0.14  1.0000
   0   6  20   20902    8681                                                       20515    0.28   -0.22  1.0000
   0   6 -20   18289    2460                                                       17898    0.31   -0.15  1.0000
   0  -6  21    6143    1264                                                       11388    5.98   -0.16  1.0000
   0   6  21    4885    1408                                                        9643   -5.98   -0.01  1.0000
   0   6  21    4801    1166                                                        9526   -5.98   -0.01  1.0000
   0   6 -21    5865     939                                                       11008    5.98    0.16  1.0000
   0   6 -21    6491    1793                                                       11861    5.98    0.16  1.0000
   0  -6 -21    6101     834                                                       11325   -5.98    0.01  1.0000
   0  -6  22   24113    1448                                                       17458    4.89   -0.02  1.0000
   0   6  22   24354    2095                                                       17680    4.87    0.00  1.0000
   0   6 -22   22916     927                                                       16442    4.89    0.02  1.0000
   0   6 -22   26500    2236                                                       19498    4.89    0.02  1.0000
   0  -6 -22   24684    1397                                                       17961    4.87    0.00  1.0000
   0  -6  23     126     395                                                         813   -3.65   -0.09  1.0000
   0   6  23     115     361                                                         791    3.67   -0.06  1.0000
   0   6  23     158     622                                                         898    3.67   -0.06  1.0000
   0   6 -23      93     276                                                         726   -3.65    0.09  1.0000
   0   6 -23       9     393                                                         205   -3.65    0.09  1.0000
   0  -6 -23       7     245                                                         404    3.67    0.06  1.0000
   0  -6  24    4574     786                                                        3880   -1.13    0.01  1.0000
   0   6  24    3738     835                                                        3132   -1.09    0.13  1.0000
   0   6  24    4495     723                                                        3828   -1.09    0.13  1.0000
   0   6 -24    3305     636                                                        2719   -1.13   -0.01  1.0000
   0   6 -24    5207     865                                                        4464   -1.13   -0.01  1.0000
   0  -6 -24    3294     659                                                        2727   -1.09   -0.13  1.0000
   0  -6  25    1005     255                                                         502   -1.96    0.06  1.0000
   0   6  25    1160     321                                                         614    1.96   -0.03  1.0000
   0   6  25     366     170                                                          97    1.96   -0.03  1.0000
   0   6 -25     720     261                                                         307   -1.96   -0.06  1.0000
   0  -6 -25    1245     365                                                         676    1.96    0.03  1.0000
   0  -6  26     936     732                                                        2521   -4.14   -0.18  1.0000
   0   6  26     287     894                                                        1336   -4.14   -0.01  1.0000
   0   6  26     377     562                                                        1523   -4.14   -0.01  1.0000
   0   6 -26    1183     912                                                        2917   -4.14    0.18  1.0000
   0  -6 -26     394     607                                                        1557   -4.14    0.01  1.0000
   0  -6  27    9833    4503                                                        7202    3.02   -0.10  1.0000
   0   6  27    8956    1164                                                        6457   -3.01   -0.10  1.0000
   0   6 -27   10793    1147                                                        8027    3.02    0.10  1.0000
   0  -6 -27    8747    1239                                                        6280   -3.01    0.10  1.0000
   0  -6  28   20196    2051                                                       15628    3.61    0.04  1.0000
   0   6  28   17159    1961                                                       12969    3.61   -0.09  1.0000
   0   6  28   16970    2094                                                       12804    3.61   -0.09  1.0000
   0   6 -28   17461    1900                                                       13234    3.61   -0.04  1.0000
   0  -6 -28   19363    1747                                                       14893    3.61    0.09  1.0000
   0  -6  29     499     462                                                         442   -0.28    0.15  1.0000
   0   6  29     326     240                                                         284    0.25    0.19  1.0000
   0   6 -29     572     388                                                         511   -0.28   -0.15  1.0000
   0  -6 -29     164     301                                                         135    0.25   -0.19  1.0000
   0  -6  30    2843     905                                                        2751    0.18    0.07  1.0000
   0   6  30    2801     998                                                        2711    0.18    0.06  1.0000
   0   6 -30    1588     688                                                        1519    0.18   -0.07  1.0000
   0  -6 -30    1177     621                                                        1119    0.18   -0.06  1.0000
   0  -6  31    2145     805                                                        1782   -0.87    0.06  1.0000
   0   6  31    2817     942                                                        2398    0.87    0.02  1.0000
   0   6 -31    1924     656                                                        1581   -0.87   -0.06  1.0000
   0  -6 -31    3192     828                                                        2745    0.87   -0.02  1.0000
   0  -6  32   12890    1795                                                       11631   -1.20    0.11  1.0000
   0   6  32   15848    8902                                                       14441   -1.21   -0.09  1.0000
   0   6 -32   14126    1850                                                       12806   -1.20   -0.11  1.0000
   0  -6 -32   15145    1922                                                       13770   -1.21    0.09  1.0000
   0  -6  33    1027     421                                                        1000   -0.09    0.01  1.0000
   0   6  33     760     411                                                         730    0.12    0.05  1.0000
   0   6 -33     408     716                                                         391   -0.09   -0.01  1.0000
   0  -6 -33    1219     582                                                        1181    0.12   -0.05  1.0000
   0  -6  34      20     345                                                         -72   -0.95    0.08  1.0000
   0   6  34     411     326                                                         247   -0.97   -0.19  1.0000
   0   6 -34      20     633                                                        -557   -0.95   -0.08  1.0000
   0  -6 -34     767     296                                                         536   -0.97    0.19  1.0000
   0  -6  35   14417    8691                                                       15512    0.94   -0.12  1.0000
   0   6  35   10901    2332                                                       11877   -0.97   -0.16  1.0000
   0   6 -35   11905    2030                                                       12902    0.94    0.12  1.0000
   0  -6 -35   12461    2338                                                       13503   -0.97    0.16  1.0000
   0  -6  36    3765     989                                                        2978    1.43   -0.03  1.0000
   0   6  36    5419     595                                                        4454    1.45    0.14  1.0000
   0   6 -36    6170    1223                                                        5150    1.43    0.03  1.0000
   0  -6 -36    6390    1005                                                        5339    1.45   -0.14  1.0000
   0  -6  37   11390    1482                                                       10411   -0.99   -0.07  1.0000
   0   6  37   12250    1978                                                       11222    1.00   -0.10  1.0000
   0   6 -37   14928    2280                                                       13804   -0.99    0.07  1.0000
   0  -6 -37    9162    1652                                                        8276    1.00    0.10  1.0000
   0  -6  38    2032     910                                                        2033    0.02   -0.74  1.0000
   0   6  38    3158     959                                                        3151    0.04    0.70  1.0000
   0   6 -38    1022     541                                                        1019    0.02    0.74  1.0000
   0  -6 -38    3410     953                                                        3403    0.04   -0.70  1.0000
   0  -6  39   11625    2524                                                       12223    0.58    0.03  1.0000
   0   6  39   14203    2800                                                       14849   -0.57    0.17  1.0000
   0   6 -39   11445    2400                                                       12038    0.58   -0.03  1.0000
   0  -6 -39   14722    2295                                                       15380   -0.57   -0.17  1.0000
   0   6  40    1709     796                                                        1537   -0.53   -0.72  1.0000
   0   6 -40    1073     722                                                         941   -0.52   -0.77  1.0000
   0  -6 -40     578     391                                                         474   -0.53    0.72  1.0000
   0   6  41     191     268                                                          97    0.84    0.06  1.0000
   0   6 -41     609     625                                                         426   -0.85   -0.05  1.0000
   0  -6 -41     595     452                                                         417    0.84   -0.06  1.0000
   0   6  42     447     495                                                         466   -0.05   -0.16  1.0000
   0   6 -42     292     709                                                         302   -0.05    0.09  1.0000
   0  -6 -42     799     677                                                         824   -0.05    0.16  1.0000
   0   6  43     828     569                                                        1023   -0.68   -0.15  1.0000
   0   6 -43    1038     803                                                        1250    0.66    0.00  1.0000
   0  -6 -43     318     361                                                         443   -0.68    0.15  1.0000
   0  -7   1  311001    8176                                                      223835  -17.85   -0.12  1.0000
   0   7   1  313534    8258                                                      225843  -17.88   -0.04  1.0000
   0   7   1  312017    8379                                                      224556  -17.88   -0.04  1.0000
   0   7  -1  316144    8444                                                      228202  -17.85    0.12  1.0000
   0   7   2  294656    8040                                                      363730   12.72   -0.13  1.0000
   0   7   2  308803    8672                                                      379429   12.72   -0.13  1.0000
   0   7   3  155681    9915                                                      271077   26.61   -0.18  1.0000
   0   7   3  150158    9708                                                      263773   26.61   -0.18  1.0000
   0   7  -3  149136    9773                                                      262349   26.60   -0.14  1.0000
   0  -7   4   28679    3947                                                       47471   10.24    0.10  1.0000
   0   7   4   33694    3361                                                       53957  -10.29    0.03  1.0000
   0   7  -4   37153    3790                                                       58216   10.24   -0.10  1.0000
   0   7  -4   36224    3444                                                       57052   10.24   -0.10  1.0000
   0  -7   5   13186    1861                                                       13216   -0.03   -0.03  1.0000
   0   7  -5   17721    3183                                                       17756   -0.03    0.03  1.0000
   0   7  -5   17293    2872                                                       17327   -0.03    0.03  1.0000
   0  -7  -5   15594    2495                                                       15682   -0.07   -0.09  1.0000
   0  -7   6  157870    6797                                                      162359    1.18   -0.17  1.0000
   0   7   6  172307    7509                                                      176937   -1.17    0.00  1.0000
   0   7  -6  179246    7982                                                      184027    1.18    0.17  1.0000
   0  -7  -6  184073    7034                                                      188857   -1.17    0.00  1.0000
   0  -7   7   37328    3377                                                       64507  -12.83   -0.16  1.0000
   0   7  -7   36963    4517                                                       64026  -12.83    0.16  1.0000
   0   7  -7   45105    4447                                                       74614  -12.83    0.16  1.0000
   0  -7  -7   40215    3751                                                       68160  -12.78   -0.12  1.0000
   0  -7   8   83710    3459                                                       64827   -7.33    0.09  1.0000
   0   7  -8   81761   32972                                                       63113   -7.33   -0.09  1.0000
   0  -7  -8   98022    4118                                                       77493    7.33   -0.01  1.0000
   0  -7   9   77887    4394                                                       89438   -4.22   -0.06  1.0000
   0   7   9   84254    4830                                                       96316   -4.24    0.10  1.0000
   0   7  -9   82780    4980                                                       94676   -4.22    0.06  1.0000
   0  -7  -9   89854    5103                                                      102297   -4.24   -0.10  1.0000
   0  -7  10   56023    3829                                                       46389    4.50   -0.01  1.0000
   0   7  10   69890    4255                                                       59096   -4.49    0.23  1.0000
   0  -7 -10   63876    3330                                                       53577   -4.49   -0.23  1.0000
   0  -7  11   27293    1387                                                       11340   12.39    0.25  1.0000
   0   7  11   29353    1764                                                       12654   12.42   -0.23  1.0000
   0   7 -11   27655    1523                                                       11574   12.39   -0.25  1.0000
   0  -7 -11   31978    1807                                                       14397   12.42    0.23  1.0000
   0  -7  12   41904    2877                                                       40193    0.89    0.14  1.0000
   0   7  12   41385    3198                                                       39713   -0.88   -0.22  1.0000
   0   7  12   45220    3290                                                       43471   -0.88   -0.22  1.0000
   0  -7 -12   44319    3099                                                       42588   -0.88    0.22  1.0000
   0  -7  13    4186     970                                                        4323    0.22   -0.02  1.0000
   0   7  13    4871    2504                                                        5010    0.21    0.14  1.0000
   0   7  13    4208    1071                                                        4337    0.21    0.14  1.0000
   0   7 -13    3126     794                                                        3244    0.22    0.02  1.0000
   0   7 -13    4863    2489                                                        5010    0.22    0.02  1.0000
   0  -7 -13    3969     962                                                        4094    0.21   -0.14  1.0000
   0  -7  14    2066     308                                                         530   -4.73   -0.04  1.0000
   0   7  14    4222     992                                                        1819    4.71   -0.04  1.0000
   0   7  14    2656     368                                                         853    4.71   -0.04  1.0000
   0   7 -14    8588    2610                                                        4934   -4.73    0.04  1.0000
   0  -7 -14    1873     301                                                         439    4.71    0.04  1.0000
   0  -7  15  102950    4148                                                       84832   -6.25   -0.16  1.0000
   0   7  15   91353    3981                                                       74327   -6.25   -0.10  1.0000
   0   7 -15  105165    4339                                                       86844   -6.25    0.16  1.0000
   0  -7 -15   90143    3964                                                       73236   -6.25    0.10  1.0000
   0  -7  16     468     932                                                        3619    8.13   -0.36  1.0000
   0   7  16    3330    3984                                                        9255   -8.13   -0.15  1.0000
   0  -7 -16    1118    1106                                                        5174   -8.13    0.15  1.0000
   0  -7  17   75875    3713                                                       74109   -0.68    0.34  1.0000
   0  -7 -17   85137    4521                                                       83253   -0.69    0.25  1.0000
   0   7  18  160979    5895                                                      197911    9.21    0.47  1.0000
   0   7 -18  163504    5496                                                      200704   -9.21   -0.59  1.0000
   0  -7 -18  176749    5729                                                      215357    9.21   -0.47  1.0000
   0   7 -19   13418    1701                                                        8105    5.45    0.61  1.0000
   0  -7 -19   22094    6436                                                       15085    5.46   -0.67  1.0000
   0  -7  20   32940    1452                                                       23035    6.28   -0.40  1.0000
   0   7  20   36298    3718                                                       25854   -6.28   -0.35  1.0000
   0   7  20   36686    2233                                                       26182   -6.28   -0.35  1.0000
   0   7 -20   33021    1284                                                       23102    6.28    0.40  1.0000
   0   7 -20   31322    2884                                                       21685    6.28    0.40  1.0000
   0  -7 -20   38004    2010                                                       27297   -6.28    0.35  1.0000
   0  -7  21    4166     828                                                        6814   -3.80    0.34  1.0000
   0   7  21    4669    4324                                                        7473   -3.82   -0.41  1.0000
   0   7 -21    4160     749                                                        6807   -3.80   -0.34  1.0000
   0   7 -21    5180    1055                                                        8096   -3.80   -0.34  1.0000
   0  -7 -21    4568     981                                                        7344   -3.82    0.41  1.0000
   0  -7  22     104     185                                                         332   -1.69    0.06  1.0000
   0   7  22     349     426                                                         712    1.69    0.08  1.0000
   0   7  22     892     454                                                        1435    1.69    0.08  1.0000
   0   7 -22     230     270                                                         537   -1.69   -0.06  1.0000
   0  -7 -22     375     298                                                         750    1.69   -0.08  1.0000
   0  -7  23     520     382                                                         786    1.10    0.22  1.0000
   0   7  23     242     343                                                         436    1.12   -0.11  1.0000
   0   7  23      34     271                                                         124    1.12   -0.11  1.0000
   0   7 -23     226     331                                                         411    1.10   -0.22  1.0000
   0   7 -23      50     353                                                         150    1.10   -0.22  1.0000
   0  -7 -23      29     295                                                         -93    1.12    0.11  1.0000
   0  -7  24     132     288                                                        -194   -2.42    0.03  1.0000
   0   7  24    1206     359                                                         537    2.44    0.09  1.0000
   0   7  24    1102     361                                                         468    2.44    0.09  1.0000
   0   7 -24     789     185                                                         276   -2.42   -0.03  1.0000
   0   7 -24     132     558                                                        -586   -2.42   -0.03  1.0000
   0  -7 -24     681     221                                                         211    2.44   -0.09  1.0000
   0  -7  25     356     325                                                         279   -0.46   -0.15  1.0000
   0   7  25    1024     402                                                         895   -0.44    0.12  1.0000
   0   7  25    1047     469                                                         916   -0.44    0.12  1.0000
   0   7 -25     547     311                                                         451   -0.46    0.15  1.0000
   0  -7 -25     880     350                                                         760   -0.44   -0.12  1.0000
   0  -7  26    5407    1046                                                        2986    3.99    0.11  1.0000
   0   7  26    4410     834                                                        2250   -4.01   -0.11  1.0000
   0   7  26    5431     899                                                        2994   -4.01   -0.11  1.0000
   0   7 -26    7556    1152                                                        4629    3.99   -0.11  1.0000
   0   7  27   48894    3744                                                       47726    0.56    0.05  1.0000
   0  -7  28   51760    3266                                                       57621   -2.65   -0.04  1.0000
   0   7  28   58941    4430                                                       65178    2.64   -0.01  1.0000
   0  -7 -28   61373    5122                                                       67734    2.64    0.01  1.0000
   0  -7  29   10141    1520                                                        9939    0.21    0.03  1.0000
   0   7  29   11082     922                                                       10896    0.19    0.01  1.0000
   0   7 -29   16304    1848                                                       16048    0.21   -0.03  1.0000
   0  -7 -29   17815    2370                                                       17579    0.19   -0.01  1.0000
   0  -7  30     293     639                                                         414    0.68   -0.10  1.0000
   0   7 -30      11    1060                                                        -299    0.68    0.10  1.0000
   0  -7 -30      10     477                                                        -630   -0.67   -0.04  1.0000
   0  -7  31   25690    2325                                                       27315   -1.05    0.07  1.0000
   0   7  31   26488    4761                                                       28097   -1.03    0.08  1.0000
   0   7 -31   30647    3122                                                       32420   -1.05   -0.07  1.0000
   0  -7 -31   26276    3011                                                       27878   -1.03   -0.08  1.0000
   0  -7  32   31945    3490                                                       32281    0.20   -0.05  1.0000
   0   7  32   38252    5073                                                       38620   -0.20   -0.07  1.0000
   0   7 -32   39411   26369                                                       39784    0.20    0.05  1.0000
   0  -7 -32   35111    3815                                                       35464   -0.20    0.07  1.0000
   0  -7  33      19     505                                                         -18    0.92    0.09  1.0000
   0   7  33    1198     655                                                        1517    0.89   -0.28  1.0000
   0  -7 -33    1593     614                                                        1958    0.89    0.28  1.0000
   0   7  34    1714     726                                                        1983   -0.66    0.20  1.0000
   0   7 -34     947     788                                                        1148    0.66   -0.19  1.0000
   0  -7 -34    2119     911                                                        2417   -0.66   -0.20  1.0000
   0   7  35    2063     721                                                        1914   -0.35    0.05  1.0000
   0   7 -35    1267     579                                                        1146   -0.37   -0.09  1.0000
   0  -7 -35    1741     602                                                        1604   -0.35   -0.05  1.0000
   0   7  36     347     410                                                         524    0.89   -0.13  1.0000
   0   7 -36     355     713                                                         531   -0.89    0.07  1.0000
   0  -7 -36     390     267                                                         576    0.89    0.13  1.0000
   0   7  37     697     460                                                         696    0.00    0.11  1.0000
   0   7 -37    2628    1269                                                        2639   -0.02    0.25  1.0000
   0  -7 -37    1640     581                                                        1639    0.00   -0.11  1.0000
   0   7  38    1263     538                                                        1098    0.51    0.16  1.0000
   0   7 -38    3918    1232                                                        3622   -0.51   -0.20  1.0000
   0  -7 -38    1994     658                                                        1785    0.51   -0.16  1.0000
   0   7  39     420     487                                                         507    0.42    0.20  1.0000
   0   7 -39     691     515                                                         806    0.44    0.19  1.0000
   0  -7 -39     386     384                                                         469    0.42   -0.20  1.0000
   0   7  40       8     677                                                         -88   -0.44   -0.40  1.0000
   0   7 -40     516     616                                                         621    0.43    0.44  1.0000
   0  -7 -40     339     378                                                         425   -0.44    0.40  1.0000
   0   7  41     113     588                                                          77   -0.38   -0.30  1.0000
   0   7 -41     268     599                                                         213   -0.38   -0.47  1.0000
   0  -7 -41    1304     619                                                        1180   -0.38    0.30  1.0000
   0   7  42     869     495                                                         947   -0.26    0.22  1.0000
   0   7 -42    1398     634                                                        1499    0.27   -0.20  1.0000
   0  -7 -42       3     458                                                        -148   -0.26   -0.22  1.0000
   0   8   0  128098    7474                                                      178173   13.55    0.27  1.0000
   0   8   0  131210    7866                                                      181840   13.55    0.27  1.0000
   0   8   1   10298    2451                                                       19814   -8.29   -0.17  1.0000
   0   8   1    5678    2313                                                       13141   -8.29   -0.17  1.0000
   0   8  -1    6300    2548                                                       14082    8.29    0.17  1.0000
   0  -8   2   41780    2289                                                       29448   -6.92   -0.30  1.0000
   0   8   2   45215    2512                                                       32423   -6.88   -0.03  1.0000
   0   8   2   44181    2502                                                       31549   -6.88   -0.03  1.0000
   0   8  -2   48460    2763                                                       35096   -6.92    0.30  1.0000
   0  -8   3   17208    2285                                                       22643    4.07   -0.10  1.0000
   0   8  -3   21944    2700                                                       28033    4.07    0.10  1.0000
   0   8   3   21967    2199                                                       28052   -4.07    0.02  1.0000
   0   8  -3   19290    2509                                                       25023    4.07    0.10  1.0000
   0  -8   4   90788    4186                                                       97120   -2.18    0.38  1.0000
   0   8  -4  106082    5070                                                      112918   -2.18   -0.38  1.0000
   0  -8   5    1803    1006                                                        5431   -6.59    0.16  1.0000
   0   8  -5    3704    1671                                                        8481   -6.59   -0.16  1.0000
   0   8  -5    3346    1547                                                        7935   -6.59   -0.16  1.0000
   0  -8  -5    1677    1421                                                        5207    6.59   -0.12  1.0000
   0  -8   6    3756     630                                                        2889    1.59   -0.28  1.0000
   0   8   6    4502     794                                                        3531    1.62    0.24  1.0000
   0   8   6    5063     906                                                        4030    1.62    0.24  1.0000
   0   8  -6    5142     967                                                        4119    1.59    0.28  1.0000
   0   8  -6    5253     970                                                        4218    1.59    0.28  1.0000
   0  -8  -6    4191     816                                                        3256    1.62   -0.24  1.0000
   0  -8   7     116     268                                                         721   -3.39   -0.06  1.0000
   0   8   7       3     237                                                         206    3.40   -0.02  1.0000
   0   8  -7      54     261                                                         550   -3.39    0.06  1.0000
   0   8  -7      21     350                                                         429   -3.39    0.06  1.0000
   0  -8  -7      70     171                                                          60    3.40    0.02  1.0000
   0  -8   8   19983    1442                                                       16400    2.81    0.44  1.0000
   0   8   8   27509    2292                                                       23362    2.75   -0.06  1.0000
   0   8  -8   20849    1802                                                       17186    2.81   -0.44  1.0000
   0  -8  -8   22778    1940                                                       19020    2.75    0.06  1.0000
   0  -8   9  114509    5207                                                      140580    7.71    0.06  1.0000
   0   8   9  100578    5452                                                      125261   -7.76   -0.19  1.0000
   0  -8  -9  119383    5612                                                      146153   -7.76    0.19  1.0000
   0  -8  10    5807    1122                                                        5198   -0.87   -0.10  1.0000
   0   8 -10    7137    1536                                                        6460   -0.87    0.10  1.0000
   0  -8 -10    7132    1213                                                        6477   -0.84   -0.25  1.0000
   0  -8  11  170621    6548                                                      177176    1.66    0.21  1.0000
   0   8  11  169308    7682                                                      175657   -1.61    0.03  1.0000
   0  -8 -11  184538    7277                                                      191164   -1.61   -0.03  1.0000
   0  -8  12   10382    1666                                                       15800   -5.02   -0.18  1.0000
   0   8 -12   10758    2792                                                       16263   -5.02    0.18  1.0000
   0  -8 -12   13645    2597                                                       19755   -5.01    0.12  1.0000
   0  -8  13   86080    2848                                                       52829  -13.41   -0.24  1.0000
   0   8  13   82225    2984                                                       49780   13.43    0.08  1.0000
   0   8  13   87198    3069                                                       53665   13.43    0.08  1.0000
   0  -8 -13   85557    3218                                                       52380   13.43   -0.08  1.0000
   0  -8  14    2449     441                                                         796    4.49   -0.10  1.0000
   0   8 -14    2793     610                                                         997    4.49    0.10  1.0000
   0  -8 -14    2748     420                                                         971    4.49   -0.11  1.0000
   0  -8  15   61682    4560                                                       92963   11.93   -0.19  1.0000
   0   8  15   53872    4539                                                       83407  -11.97    0.07  1.0000
   0   8  15   58877    4975                                                       89607  -11.97    0.07  1.0000
   0   8 -15   52795    4211                                                       81973   11.93    0.19  1.0000
   0  -8 -15   59864    4804                                                       90824  -11.97   -0.07  1.0000
   0  -8  16   62806    3653                                                       67090    1.77    0.06  1.0000
   0   8  16   52020    4068                                                       55911    1.77   -0.18  1.0000
   0   8 -16   50247    2973                                                       54086    1.77   -0.06  1.0000
   0   8 -16   53897    3206                                                       57871    1.77   -0.06  1.0000
   0  -8 -16   59350    3846                                                       63502    1.77    0.18  1.0000
   0  -8  17    6132     921                                                        6537    0.54    0.20  1.0000
   0   8 -17    6200     887                                                        6607    0.54   -0.20  1.0000
   0  -8 -17    8891    1262                                                        9369   -0.53   -0.14  1.0000
   0  -8  18    7126    1064                                                        5027   -2.85    0.22  1.0000
   0   8  18    9713     981                                                        7238   -2.84   -0.02  1.0000
   0   8 -18    6002     794                                                        4091   -2.85   -0.22  1.0000
   0   8 -18    8293     994                                                        6014   -2.85   -0.22  1.0000
   0  -8 -18    7518    1005                                                        5363   -2.84    0.02  1.0000
   0  -8  19   15212    1374                                                       23261   -6.16   -0.06  1.0000
   0   8 -19   14171    1433                                                       21969   -6.16    0.06  1.0000
   0   8 -19   16079    3084                                                       24330   -6.16    0.06  1.0000
   0  -8 -19   15809    1817                                                       23988    6.15    0.33  1.0000
   0  -8  20   39772    2466                                                       36586   -1.72   -0.16  1.0000
   0   8  20   42289    4084                                                       38981   -1.73    0.04  1.0000
   0   8 -20   44108    2670                                                       40749   -1.72    0.16  1.0000
   0  -8 -20   44746   27511                                                       41341   -1.73   -0.04  1.0000
   0   8  21   16535    1617                                                       15041   -1.26    0.15  1.0000
   0   8  21   18948    2045                                                       17346   -1.26    0.15  1.0000
   0   8 -21   17800    1484                                                       16220    1.28   -0.21  1.0000
   0   8 -21   16027    1555                                                       14529    1.28   -0.21  1.0000
   0  -8 -21   20292    1549                                                       18633   -1.26   -0.15  1.0000
   0  -8  22   17100    2301                                                       20550    2.66    0.06  1.0000
   0   8 -22   18039    2190                                                       21578    2.66   -0.06  1.0000
   0   8 -24   37879    5566                                                       40660    1.48    0.01  1.0000
   0   8  25   42472    2972                                                       40586   -0.98    0.05  1.0000
   0   8  25   36278    3342                                                       34537   -0.98    0.05  1.0000
   0   8 -25   30194    4169                                                       28580    0.99   -0.06  1.0000
   0   8  26   13125    1688                                                        9918   -3.16   -0.09  1.0000
   0   8 -26   13672    1536                                                       10415   -3.14   -0.01  1.0000
   0  -8 -26   15710    7100                                                       12180   -3.16    0.09  1.0000
   0   8  27    2983     788                                                        1860    2.43    0.09  1.0000
   0   8  27    2531     750                                                        1507    2.43    0.09  1.0000
   0  -8 -27    2091     512                                                        1172    2.43   -0.09  1.0000
   0   8  28    8491    1182                                                        8849    0.41    0.02  1.0000
   0   8  28    8908    1622                                                        9274    0.41    0.02  1.0000
   0   8 -28   12397    1754                                                       12824    0.40    0.10  1.0000
   0  -8 -28   11950    1235                                                       12374    0.41   -0.02  1.0000
   0   8  29    1798     943                                                        1570   -0.59    0.01  1.0000
   0   8  29     334     380                                                         240   -0.59    0.01  1.0000
   0   8 -29     519     495                                                         401    0.58    0.05  1.0000
   0  -8 -29     702     617                                                         562   -0.59   -0.01  1.0000
   0   8  30    3271    1113                                                        3750    0.85    0.02  1.0000
   0   8 -30    5314    1089                                                        5919    0.85   -0.06  1.0000
   0  -8 -30    4283    1067                                                        4829    0.85   -0.02  1.0000
   0   8  31      63     893                                                          12   -0.94   -0.11  1.0000
   0   8 -31    1049     463                                                         776    0.96   -0.04  1.0000
   0  -8 -31     295     322                                                         162   -0.94    0.11  1.0000
   0   8  32     652     494                                                         640    0.05   -0.06  1.0000
   0  -8 -32     298     294                                                         290    0.05    0.06  1.0000
   0   8  33     354     565                                                         302   -0.30   -0.09  1.0000
   0   8 -33    2174    1072                                                        2050    0.29   -0.09  1.0000
   0  -8 -33    1037     512                                                         947   -0.30    0.09  1.0000
   0   8  34     417     400                                                         384   -0.18   -0.16  1.0000
   0   8 -34     159     838                                                         141   -0.16   -0.16  1.0000
   0  -8 -34    1290     504                                                        1232   -0.18    0.16  1.0000
   0   8  35    1246     733                                                        1864    1.66    0.30  1.0000
   0   8 -35     751     467                                                        1240   -1.65   -0.06  1.0000
   0  -8 -35     569     493                                                        1006    1.66   -0.30  1.0000
   0   8  36     716     376                                                         619    0.40    0.23  1.0000
   0   8 -36    2315     625                                                        2146    0.38    0.05  1.0000
   0  -8 -36     897     534                                                         788    0.40   -0.23  1.0000
   0   8  37     359     455                                                         502   -0.72   -0.20  1.0000
   0   8 -37     382     462                                                         525    0.71    0.03  1.0000
   0  -8 -37     187     354                                                         293   -0.72    0.20  1.0000
   0   8  38    5492    1407                                                        5914   -0.59   -0.03  1.0000
   0   8 -38    7988    1363                                                        8493   -0.59   -0.03  1.0000
   0  -8 -38    7041    1271                                                        7517   -0.59    0.03  1.0000
   0   8  39    2317     912                                                        2488   -0.37   -0.05  1.0000
   0   8 -39    4472    1464                                                        4711    0.37    0.10  1.0000
   0  -8 -39    1415     662                                                        1550   -0.37    0.05  1.0000
   0   8  40    5139    1446                                                        4848    0.44    0.00  1.0000
   0   8 -40    7668    4100                                                        7314    0.43    0.08  1.0000
   0  -8 -40    5867    1836                                                        5555    0.44    0.00  1.0000
   0   9  -1    2971     386                                                         764    5.67   -0.03  1.0000
   0   9   1    3723     538                                                        1154    5.71   -0.01  1.0000
   0   9   1     731     346                                                         -25    5.71   -0.01  1.0000
   0   9  -1    1225     209                                                          66    5.67   -0.03  1.0000
   0   9   2   56457    2139                                                       21240   19.39   -0.11  1.0000
   0   9  -2   59054    2546                                                       22830  -19.40   -0.06  1.0000
   0  -9   3   19009    2375                                                       31645   -8.45    0.02  1.0000
   0   9   3   17749    2756                                                       30050   -8.47   -0.27  1.0000
   0   9  -3   20644    2870                                                       33745   -8.45   -0.02  1.0000
   0  -9   4   41515    3273                                                       62126    9.60   -0.31  1.0000
   0   9  -4   50007   34717                                                       72427    9.60    0.31  1.0000
   0  -9   5   15248    1611                                                       15306   -0.05   -0.14  1.0000
   0   9  -5   20721    3179                                                       20789   -0.05    0.14  1.0000
   0   9  -5   21764    2792                                                       21834   -0.05    0.14  1.0000
   0  -9  -5   16969    1617                                                       17119   -0.12    0.05  1.0000
   0  -9   6   25354    2159                                                       39453    8.32    0.34  1.0000
   0   9   6   31177    3194                                                       46429   -8.21    0.88  1.0000
   0   9  -6   32812    3592                                                       48638    8.32   -0.34  1.0000
   0   9  -6   30206    2665                                                       45453    8.32   -0.34  1.0000
   0  -9  -6   31877    2730                                                       47283   -8.21   -0.88  1.0000
   0  -9   7   49492    2073                                                       34931    7.51   -0.17  1.0000
   0   9   7   56035    2785                                                       40338    7.57    0.43  1.0000
   0   9  -7   54989    2861                                                       39572    7.51    0.17  1.0000
   0   9  -7   58502    2963                                                       42561    7.51    0.17  1.0000
   0  -9  -7   57587    2652                                                       41656    7.57   -0.43  1.0000
   0  -9   8   76944    3458                                                       66167   -4.26   -0.22  1.0000
   0   9   8   83350    3877                                                       72296    4.19   -0.45  1.0000
   0   9  -8   86121    4317                                                       74696   -4.26    0.22  1.0000
   0  -9  -8   92428    4471                                                       80767    4.19    0.45  1.0000
   0  -9   9   63432    3872                                                       79071   -6.19    0.02  1.0000
   0   9   9   67741    4799                                                       83819   -6.17   -0.02  1.0000
   0   9  -9   66139    4448                                                       82090   -6.19   -0.02  1.0000
   0  -9  -9   68585    4420                                                       84757   -6.17    0.02  1.0000
   0   9  10  143543    3444                                                      119201    7.10   -0.29  1.0000
   0  -9 -10  137542    5955                                                      113738    7.10    0.29  1.0000
   0  -9  11     629     199                                                         418   -1.01    0.34  1.0000
   0  -9 -11    1055     391                                                         764   -1.02    0.04  1.0000
   0   9  12    3511    1193                                                        5919   -3.73   -0.01  1.0000
   0   9  12    4484    1322                                                        7165   -3.73   -0.01  1.0000
   0   9 -12    4569    1224                                                        7286    3.75   -0.32  1.0000
   0   9 -12    3215    1277                                                        5544    3.75   -0.32  1.0000
   0  -9 -12    4139    1093                                                        6726   -3.73    0.01  1.0000
   0   9  13       3     326                                                         409    3.89   -0.14  1.0000
   0   9  13      54     409                                                         665    3.89   -0.14  1.0000
   0   9 -13      30     240                                                         577    3.91    0.11  1.0000
   0   9 -13      54     395                                                         671    3.91    0.11  1.0000
   0  -9 -13      38     266                                                         604    3.89    0.14  1.0000
   0   9  14     487     408                                                         985   -1.96    0.16  1.0000
   0   9  14      87     516                                                         -14   -1.96    0.16  1.0000
   0   9 -14      15     321                                                         175    1.98    0.02  1.0000
   0   9 -14       1     339                                                         108    1.98    0.02  1.0000
   0  -9 -14      75     297                                                         324   -1.96   -0.16  1.0000
   0   9  15    1023     363                                                         802   -0.78   -0.13  1.0000
   0   9  15     746     262                                                         559   -0.78   -0.13  1.0000
   0   9 -15     475     351                                                         327   -0.79    0.04  1.0000
   0   9 -15     704     385                                                         520   -0.79    0.04  1.0000
   0  -9 -15    1005     376                                                         786   -0.78    0.13  1.0000
   0   9  16    4135     961                                                        5404   -1.94    0.02  1.0000
   0   9  16    5752     999                                                        7233   -1.94    0.02  1.0000
   0   9 -16    3705     817                                                        4893    1.92   -0.02  1.0000
   0   9 -16    3730     869                                                        4922    1.92   -0.02  1.0000
   0  -9 -16    4132     899                                                        5400   -1.94   -0.02  1.0000
   0   9  17    5301     998                                                        5870    0.80    0.16  1.0000
   0   9  17    3731    1105                                                        4210    0.80    0.16  1.0000
   0   9 -17    5738    1056                                                        6332    0.81    0.07  1.0000
   0   9 -17    4929    1031                                                        5480    0.81    0.07  1.0000
   0  -9 -17    4966    1124                                                        5517    0.80   -0.16  1.0000
   0   9  18     181     710                                                        1670    5.79    0.15  1.0000
   0   9  18      43     724                                                        1153    5.79    0.15  1.0000
   0   9 -18       1     332                                                         695   -5.78   -0.04  1.0000
   0   9 -18     113     731                                                        1445   -5.78   -0.04  1.0000
   0  -9 -18     897     997                                                        3290    5.79   -0.15  1.0000
   0   9  19   11638   11322                                                       16758   -4.55   -0.12  1.0000
   0   9  19   17062   15570                                                       23164   -4.55   -0.12  1.0000
   0   9 -19   16562    2545                                                       22535   -4.52   -0.12  1.0000
   0   9 -19   24921    2221                                                       32144   -4.52   -0.12  1.0000
   0  -9 -19   18212    2138                                                       24501   -4.55    0.12  1.0000
   0   9  20   44407    4436                                                       51999   -3.65   -0.16  1.0000
   0  -9 -20   64057    3934                                                       73115   -3.65    0.16  1.0000
   0   9 -21    9346    1662                                                       14132    4.69    0.16  1.0000
   0  -9 -21    9612    2373                                                       14505    4.73   -0.21  1.0000
   0   9  22    3243    1211                                                        3230    0.02    0.01  1.0000
   0   9 -22    2896     961                                                        2872   -0.05    0.15  1.0000
   0  -9 -22    3161     780                                                        3148    0.02   -0.01  1.0000
   0   9  23   23858    2983                                                       22845   -0.70    0.15  1.0000
   0   9  23   22957    2826                                                       21963   -0.70    0.15  1.0000
   0   9 -23   26260    2601                                                       25171   -0.72    0.04  1.0000
   0   9 -23   22661    3191                                                       21651   -0.72    0.04  1.0000
   0  -9 -23   23296    2819                                                       22295   -0.70   -0.15  1.0000
   0   9  24     728     339                                                         385    1.55   -0.03  1.0000
   0   9  24    1823     604                                                        1248    1.55   -0.03  1.0000
   0   9 -24    2236     678                                                        1591   -1.56   -0.21  1.0000
   0  -9 -24    1421     459                                                         920    1.55    0.03  1.0000
   0   9  25    1931    1017                                                        3035   -2.34   -0.34  1.0000
   0   9  25    2246    1060                                                        3428   -2.34   -0.34  1.0000
   0   9 -25    2465    1420                                                        3675   -2.31   -0.14  1.0000
   0  -9 -25    2154     865                                                        3314   -2.34    0.34  1.0000
   0   9  26    2191     699                                                        1773   -0.99    0.08  1.0000
   0   9  26     731     314                                                         499   -0.99    0.08  1.0000
   0   9 -26    1988    1047                                                        1588    1.00   -0.06  1.0000
   0  -9 -26     770     314                                                         531   -0.99   -0.08  1.0000
   0   9  27    1484     486                                                         966    1.57   -0.01  1.0000
   0   9  27    1495     698                                                         975    1.57   -0.01  1.0000
   0   9 -27    1855     643                                                        1266    1.58   -0.04  1.0000
   0  -9 -27     993     554                                                         579    1.57    0.01  1.0000
   0   9  28    1092     572                                                        1091    0.00   -0.18  1.0000
   0   9  28    1160     479                                                        1159    0.00   -0.18  1.0000
   0   9 -28    1188     665                                                        1191   -0.01   -0.06  1.0000
   0  -9 -28     987     444                                                         986    0.00    0.18  1.0000
   0   9  29    1041     517                                                         868    0.59    0.08  1.0000
   0   9  29    1496     547                                                        1287    0.59    0.08  1.0000
   0   9 -29    1007     479                                                         841    0.58   -0.08  1.0000
   0  -9 -29     309     243                                                         218    0.59   -0.08  1.0000
   0   9  30    1055     614                                                        1016    0.17    0.21  1.0000
   0   9  30     357     275                                                         334    0.17    0.21  1.0000
   0   9 -30      31     459                                                          24   -0.15    0.20  1.0000
   0  -9 -30       2     408                                                         -13    0.17   -0.21  1.0000
   0   9  31      20     649                                                        -602   -0.95    0.07  1.0000
   0   9 -31     534     499                                                         763   -0.94    0.20  1.0000
   0  -9 -31     743     486                                                        1008   -0.95   -0.07  1.0000
   0   9  32    1366     676                                                        1195    0.51   -0.06  1.0000
   0   9 -32     305     406                                                         228   -0.50   -0.01  1.0000
   0  -9 -32     463     293                                                         366    0.51    0.06  1.0000
   0   9  33     814     567                                                         961   -0.52   -0.07  1.0000
   0   9 -33     676     569                                                         809   -0.52    0.04  1.0000
   0  -9 -33     541     360                                                         662   -0.52    0.07  1.0000
   0   9  34    4241     972                                                        5049   -1.25    0.02  1.0000
   0   9 -34    6647    1404                                                        7657    1.26   -0.08  1.0000
   0  -9 -34    3876    3149                                                        4650   -1.25   -0.02  1.0000
   0   9 -35    1964     621                                                        1411    1.43   -0.05  1.0000
   0  -9 -35    3425     828                                                        2682    1.42   -0.06  1.0000
   0   9  36    1481     551                                                        1101    1.12   -0.12  1.0000
   0   9 -36    2137     597                                                        1665   -1.14    0.05  1.0000
   0  -9 -36    1112     562                                                         786    1.12    0.12  1.0000
   0   9  37    1350     544                                                        1418   -0.19   -0.03  1.0000
   0   9 -37     352     495                                                         389   -0.20   -0.06  1.0000
   0  -9 -37     295     352                                                         327   -0.19    0.03  1.0000
   0   9  38    1583     873                                                        1699   -0.30    0.09  1.0000
   0   9 -38    4272    1161                                                        4458    0.30   -0.03  1.0000
   0  -9 -38    1193     494                                                        1294   -0.30   -0.09  1.0000
   0   9  39      20     622                                                         -71   -0.94   -0.07  1.0000
   0   9 -39      20     655                                                         -96   -0.95   -0.04  1.0000
   0  -9 -39     254     311                                                         133   -0.94    0.07  1.0000
   0  10   0   10846     718                                                        2145  -12.21   -0.02  1.0000
   0  10  -1   48361    3931                                                       46610   -0.85   -0.17  1.0000
   0  10   1   37059    2057                                                       35425    0.91   -0.21  1.0000
   0  10  -1   48945    2790                                                       47183   -0.85   -0.17  1.0000
   0  10   2    1404     868                                                        3532    4.63   -0.06  1.0000
   0  10  -2    2649    1387                                                        5346    4.57   -0.03  1.0000
   0  10   3   60432    3391                                                       58947    0.64   -0.38  1.0000
   0  10   3   70725    3919                                                       69118    0.64   -0.38  1.0000
   0  10  -3   76422    4008                                                       74576   -0.71    0.49  1.0000
   0  10   4   17598    1784                                                       11381    5.48    0.11  1.0000
   0  10  -4   12980    1894                                                        7715    5.51    0.28  1.0000
   0 -10  -4   11223    1635                                                        6394    5.48   -0.11  1.0000
   0  10  -5   51293    3425                                                       58164    3.10   -0.09  1.0000
   0 -10  -5   52369    3409                                                       59296   -3.09   -0.46  1.0000
   0  10  -6    5096     962                                                        3228   -3.08   -0.25  1.0000
   0  10  -6    4281     733                                                        2587   -3.08   -0.25  1.0000
   0 -10  -6    2412     837                                                        1189   -3.09    0.25  1.0000
   0 -10  -7   18255    1368                                                       23781    4.03   -0.17  1.0000
   0 -10  -8   60241    4174                                                       69254   -3.74    0.06  1.0000
   0  10   9   22351    1708                                                       19470   -2.10   -0.17  1.0000
   0  10  -9   16168    1566                                                       13763    2.08   -0.45  1.0000
   0 -10  -9   13976    1968                                                       11719   -2.10    0.17  1.0000
   0  10  10    1152     364                                                         844    1.03    0.16  1.0000
   0  10  10    2705     929                                                        2221    1.03    0.16  1.0000
   0  10 -10    1571     512                                                        1216    1.01   -0.35  1.0000
   0  10 -10    1420     581                                                        1083    1.01   -0.35  1.0000
   0 -10 -10    2563     784                                                        2092    1.03   -0.16  1.0000
   0  10  11    2049     541                                                        1645   -0.99   -0.01  1.0000
   0  10  11    3476     796                                                        2943   -0.99   -0.01  1.0000
   0  10 -11    3097     710                                                        2593    1.00   -0.21  1.0000
   0  10 -11    2812     815                                                        2333    1.00   -0.21  1.0000
   0 -10 -11    2762     656                                                        2289   -0.99    0.01  1.0000
   0  10  12      67     393                                                         686    7.25    0.35  1.0000
   0  10  12      89     423                                                         623    7.25    0.35  1.0000
   0  10 -12       0     456                                                        1192    7.20   -0.34  1.0000
   0  10 -12     465     365                                                         158    7.20   -0.34  1.0000
   0 -10 -12     306     314                                                         286    7.25   -0.35  1.0000
   0  10  13    1128     260                                                         544    2.17   -0.01  1.0000
   0  10  13     327     487                                                          61    2.17   -0.01  1.0000
   0  10 -13     219     252                                                          22   -2.12    0.45  1.0000
   0  10 -13    1267     359                                                         663   -2.12    0.45  1.0000
   0 -10 -13     832     247                                                         345    2.17    0.01  1.0000
   0  10  14    1519     379                                                         -56   -8.23   -0.15  1.0000
   0  10  14    5355     572                                                        1172   -8.23   -0.15  1.0000
   0  10 -14    5259     483                                                        1155   -8.19    0.51  1.0000
   0  10 -14    3635     337                                                         470   -8.19    0.51  1.0000
   0 -10 -14    1519     323                                                        -207   -8.23    0.15  1.0000
   0  10  15    1435     532                                                        1239   -0.57   -0.07  1.0000
   0  10  15     999     387                                                         837   -0.57   -0.07  1.0000
   0  10 -15    1378     556                                                        1195    0.54   -0.11  1.0000
   0  10 -15    1124     376                                                         959    0.54   -0.11  1.0000
   0 -10 -15     931     379                                                         774   -0.57    0.07  1.0000
   0  10  16     131     281                                                          76    0.61   -0.17  1.0000
   0  10  16    2909    1008                                                        2630    0.61   -0.17  1.0000
   0  10 -16     437     311                                                         327    0.62   -0.13  1.0000
   0  10 -16       9     494                                                        -443    0.62   -0.13  1.0000
   0 -10 -16       9     426                                                        -622    0.61    0.17  1.0000
   0  10  17     618     406                                                         889   -1.04   -0.11  1.0000
   0  10  17     233     395                                                         408   -1.04   -0.11  1.0000
   0  10 -17     252     274                                                         434    1.04    0.20  1.0000
   0  10 -17     637     398                                                         912    1.04    0.20  1.0000
   0 -10 -17     486     503                                                         729   -1.04    0.11  1.0000
   0  10  18    2752     980                                                        5622    4.75   -0.29  1.0000
   0  10  18    1606     780                                                        3917    4.75   -0.29  1.0000
   0  10 -18     692     802                                                        2383    4.75    0.04  1.0000
   0 -10 -18    1821     951                                                        4249    4.75    0.29  1.0000
   0  10  19   12700    2129                                                       13006    0.28    0.22  1.0000
   0  10 -19   15886    2003                                                       16193   -0.25   -0.33  1.0000
   0  10 -19   12792    1686                                                       13068   -0.25   -0.33  1.0000
   0 -10 -19   12922    2101                                                       13231    0.28   -0.22  1.0000
   0  10  20     149     326                                                          -3   -2.56    0.32  1.0000
   0  10  20    2373     585                                                        1358   -2.56    0.32  1.0000
   0  10 -20     697     312                                                         204   -2.57    0.22  1.0000
   0 -10 -20     149     391                                                        -433   -2.56   -0.32  1.0000
   0  10  21    1873     793                                                        2209    0.79    0.05  1.0000
   0  10  21    2523     852                                                        2911    0.79    0.05  1.0000
   0  10 -21     851     452                                                        1102   -0.85    0.10  1.0000
   0  10 -21    3039     901                                                        3499   -0.85    0.10  1.0000
   0 -10 -21    1047     476                                                        1302    0.79   -0.05  1.0000
   0  10  22    5620    1064                                                        5365   -0.36   -0.13  1.0000
   0  10  22    7517    1132                                                        7222   -0.36   -0.13  1.0000
   0  10 -22    6326    1497                                                        6082   -0.33   -0.37  1.0000
   0  10 -22    7833    1447                                                        7562   -0.33   -0.37  1.0000
   0 -10 -22    7216    1284                                                        6927   -0.36    0.13  1.0000
   0  10  23    2111     808                                                        1655    1.11   -0.02  1.0000
   0  10  23    2054     513                                                        1605    1.11   -0.02  1.0000
   0  10 -23    2059     593                                                        1618   -1.09    0.02  1.0000
   0  10 -23    2573     757                                                        2077   -1.09    0.02  1.0000
   0 -10 -23    1179     403                                                         845    1.11    0.02  1.0000
   0  10  24   10143    1994                                                       10386   -0.25    0.32  1.0000
   0  10  24    9778     812                                                       10016   -0.25    0.32  1.0000
   0  10 -24   15257    2550                                                       15599   -0.29    0.08  1.0000
   0 -10 -24   10207    1713                                                       10451   -0.25   -0.32  1.0000
   0  10  25     926     667                                                        1947   -2.89   -0.06  1.0000
   0 -10 -25     650     715                                                        1535   -2.89    0.06  1.0000
   0  10  26   13332    1525                                                       12506    0.77   -0.06  1.0000
   0  10  26   10772    1813                                                       10030    0.77   -0.06  1.0000
   0  10 -26   16334    2260                                                       15426    0.76   -0.07  1.0000
   0 -10 -26   14626    1912                                                       13760    0.77    0.06  1.0000
   0  10  27    2016     791                                                        1852    0.39   -0.08  1.0000
   0  10  27    4542     735                                                        4294    0.39   -0.08  1.0000
   0 -10 -27    3296    1009                                                        3085    0.39    0.08  1.0000
   0  10  28    8128    1051                                                        7811    0.38   -0.28  1.0000
   0  10 -28    5370    1000                                                        5111    0.38    0.11  1.0000
   0 -10 -28    4199    1126                                                        3971    0.38    0.28  1.0000
   0  10  29   11032    1446                                                        9569    1.52    0.00  1.0000
   0  10  29   12764    2191                                                       11186    1.52    0.00  1.0000
   0  10 -29   12958    1881                                                       11348   -1.54   -0.06  1.0000
   0 -10 -29   15326    1236                                                       13592    1.52    0.00  1.0000
   0  10  30    1416     653                                                        1871   -1.19    0.11  1.0000
   0  10  30    1387     793                                                        1837   -1.19    0.11  1.0000
   0 -10 -30     636     490                                                         951   -1.19   -0.11  1.0000
   0  10  31    4897     917                                                        4707    0.29    0.04  1.0000
   0  10 -31    6676    1349                                                        6456   -0.29   -0.01  1.0000
   0 -10 -31    4367    1040                                                        4187    0.29   -0.04  1.0000
   0  10  32     926     465                                                         733    0.71   -0.07  1.0000
   0  10 -32    1881     812                                                        1601    0.71    0.04  1.0000
   0 -10 -32    1349     520                                                        1114    0.71    0.07  1.0000
   0  10  33    1194     506                                                        1519   -0.93    0.05  1.0000
   0  10 -33     243     549                                                         396    0.91    0.06  1.0000
   0 -10 -33     755     556                                                        1017   -0.93   -0.05  1.0000
   0  10  34     230     270                                                         204    0.19    0.10  1.0000
   0  10 -34       1     611                                                         -73    0.19   -0.15  1.0000
   0 -10 -34      58     230                                                          45    0.19   -0.10  1.0000
   0  10  35       0     613                                                        -191    0.07    0.05  1.0000
   0  10 -35     508     490                                                         497   -0.05    0.00  1.0000
   0 -10 -35     325     313                                                         313    0.07   -0.05  1.0000
   0  10  36       1     542                                                           1   -0.37   -0.01  1.0000
   0  10 -36     575     466                                                         666   -0.38    0.07  1.0000
   0 -10 -36     450     504                                                         528   -0.37    0.01  1.0000
   0  10  37     857     525                                                         908   -0.17   -0.10  1.0000
   0  10 -37       1     700                                                          -3    0.17   -0.03  1.0000
   0  11   1     783     184                                                         -80    5.91   -0.15  1.0000
   0  11   1     145     276                                                         276    5.91   -0.15  1.0000
   0  11   1      49     772                                                        1049    5.91   -0.15  1.0000
   0  11  -1      31     260                                                         513    5.92    0.05  1.0000
   0  11   2    2231     343                                                         773   -4.11   -0.27  1.0000
   0  11   2    3408     702                                                        1518   -4.11   -0.27  1.0000
   0  11  -2    3034     610                                                        1268    4.11    0.02  1.0000
   0  11   2     381     403                                                        -242   -4.11   -0.27  1.0000
   0  11  -2    1868     324                                                         564    4.11    0.02  1.0000
   0  11   3    1034     255                                                         -45   -6.79    0.18  1.0000
   0  11   3     133     381                                                         425   -6.79    0.18  1.0000
   0  11  -3      67     538                                                        1671   -6.91   -0.52  1.0000
   0  11   3       6     636                                                        1189   -6.79    0.18  1.0000
   0  11  -3     120     388                                                         481   -6.91   -0.52  1.0000
   0  11   4     689     382                                                         900    0.77    0.28  1.0000
   0  11  -4    1438     761                                                        1819   -0.94   -0.48  1.0000
   0  11  -4      16     489                                                          72   -0.94   -0.48  1.0000
   0 -11  -4     481     288                                                         659    0.77   -0.28  1.0000
   0  11   5   18733    1735                                                       14313   -3.67    1.04  1.0000
   0 -11  -6   59815    3538                                                       49692    4.58   -0.87  1.0000
   0 -11  -7   69458    4420                                                       84206    5.61    1.36  1.0000
   0  11  -8   16157    2794                                                       21969    4.46   -0.03  1.0000
   0 -11  -8   17478    2854                                                       23572   -4.49    0.85  1.0000
   0 -11  -9   43457    3675                                                       47819    2.16   -0.07  1.0000
   0  11 -10    4517    1077                                                        4069    0.72    0.03  1.0000
   0 -11 -10    5287    1300                                                        4766   -0.78    0.12  1.0000
   0  11  11    3433     431                                                        1262   -4.88    0.34  1.0000
   0  11 -11    2639     455                                                         784   -4.93    0.04  1.0000
   0  11 -11    3352     599                                                        1192   -4.93    0.04  1.0000
   0 -11 -11    4165     566                                                        1720   -4.88   -0.34  1.0000
   0  11  12    2229     525                                                         947    3.47    0.06  1.0000
   0  11 -12    2101     661                                                         865   -3.47   -0.04  1.0000
   0  11 -12    3840     687                                                        2074   -3.47   -0.04  1.0000
   0 -11 -12    3697     673                                                        1969    3.47   -0.06  1.0000
   0  11  13   14868    1596                                                       12948    1.72    0.19  1.0000
   0  11 -13   13690    1602                                                       11836    1.73   -0.04  1.0000
   0  11 -13   14309    1844                                                       12412    1.73   -0.04  1.0000
   0 -11 -13   15853    1096                                                       13868    1.72   -0.19  1.0000
   0  11  14   13220    1200                                                       11949    1.20    0.10  1.0000
   0  11  14   12184    1636                                                       10965    1.20    0.10  1.0000
   0  11 -14   14605    1534                                                       13248   -1.21   -0.17  1.0000
   0  11 -14   11286    1962                                                       10097   -1.21   -0.17  1.0000
   0 -11 -14   13516    1141                                                       12230    1.20   -0.10  1.0000
   0  11  15    1117     641                                                        1544   -1.24   -0.25  1.0000
   0  11  15    1511     708                                                        2003   -1.24   -0.25  1.0000
   0  11 -15     892     610                                                        1265   -1.20    0.19  1.0000
   0 -11 -15    1257     647                                                        1709   -1.24    0.25  1.0000
   0  11  16   13581    2389                                                       19646   -4.99    0.07  1.0000
   0  11  16   17937    2556                                                       24824   -4.99    0.07  1.0000
   0 -11 -16   21718    3457                                                       29240   -4.99   -0.07  1.0000
   0  11  17   23402    3329                                                       19371    2.91    0.08  1.0000
   0  11 -17   22621    2665                                                       18679    2.90   -0.31  1.0000
   0  11 -17   20233    2654                                                       16515    2.90   -0.31  1.0000
   0 -11 -17   32205    2769                                                       27444    2.91   -0.08  1.0000
   0  11  18    2825    1121                                                        3416    1.12   -0.13  1.0000
   0  11  18    2616    1601                                                        3185    1.12   -0.13  1.0000
   0  11 -18    2691    1094                                                        3272   -1.12    0.00  1.0000
   0 -11 -18    2545     953                                                        3107    1.12    0.13  1.0000
   0  11  19    2102    1144                                                        3068   -2.01    0.08  1.0000
   0  11  19    2983    1431                                                        4116   -2.01    0.08  1.0000
   0  11 -19    1844    1014                                                        2750   -2.00    0.15  1.0000
   0  11 -19    2914    1153                                                        4030   -2.00    0.15  1.0000
   0 -11 -19    3937     803                                                        5225   -2.01   -0.08  1.0000
   0  11  20    4722    1246                                                        7295    3.52    0.51  1.0000
   0  11  20    4266    1179                                                        6726    3.52    0.51  1.0000
   0  11 -20    5894    1188                                                        8631   -3.40   -0.29  1.0000
   0  11 -20    4334    1159                                                        6718   -3.40   -0.29  1.0000
   0 -11 -20    6981    1178                                                       10051    3.52   -0.51  1.0000
   0  11  21     764     428                                                         576   -0.77   -0.12  1.0000
   0  11  21      14     633                                                        -886   -0.77   -0.12  1.0000
   0  11 -21      13     455                                                         -52   -0.77   -0.07  1.0000
   0 -11 -21      14     403                                                        -190   -0.77    0.12  1.0000
   0  11  22    2136     388                                                        1164   -2.56   -0.38  1.0000
   0  11  22    3091     813                                                        1893   -2.56   -0.38  1.0000
   0  11 -22    2678     660                                                        1605    2.47    0.24  1.0000
   0  11 -22    4121    1095                                                        2757    2.47    0.24  1.0000
   0 -11 -22    1660     367                                                         820   -2.56    0.38  1.0000
   0  11  23    4052    1020                                                        5646    2.42   -0.11  1.0000
   0  11  23    6054    1287                                                        7973    2.42   -0.11  1.0000
   0  11 -23    6028    1136                                                        7940    2.42    0.12  1.0000
   0 -11 -23    4930    1306                                                        6674    2.42    0.11  1.0000
   0  11  24    1109     398                                                         957   -0.50   -0.30  1.0000
   0  11  24    1687     599                                                        1498   -0.50   -0.30  1.0000
   0  11 -24    1640     546                                                        1459    0.49    0.15  1.0000
   0 -11 -24     601     386                                                         490   -0.50    0.30  1.0000
   0  11  25    2919     723                                                        1941   -2.10    0.17  1.0000
   0  11  25    3093     793                                                        2084   -2.10    0.17  1.0000
   0 -11 -25    4423    1043                                                        3197   -2.10   -0.17  1.0000
   0  11  26    6051    1518                                                        6760    0.93    0.15  1.0000
   0  11  26    6329    1449                                                        7053    0.93    0.15  1.0000
   0  11 -26    9509    1256                                                       10379   -0.92   -0.03  1.0000
   0 -11 -26    5825    1496                                                        6521    0.93   -0.15  1.0000
   0  11  27    1472     643                                                        1742    0.71   -0.23  1.0000
   0  11  27     959     543                                                        1179    0.71   -0.23  1.0000
   0 -11 -27     740     500                                                         934    0.71    0.23  1.0000
   0  11  28   10177    1654                                                       10607    0.44    0.19  1.0000
   0  11  28    9284    1761                                                        9695    0.44    0.19  1.0000
   0  11 -28   10212    1461                                                       10655   -0.46   -0.14  1.0000
   0 -11 -28    7897    1947                                                        8277    0.44   -0.19  1.0000
   0  11  29     264     341                                                         277    0.39    0.35  1.0000
   0  11  29     740     431                                                         766    0.39    0.35  1.0000
   0  11 -29       3     532                                                         -51    0.35   -0.18  1.0000
   0 -11 -29     375     506                                                         392    0.39   -0.35  1.0000
   0  11  30    1406     602                                                        1658   -0.68    0.00  1.0000
   0  11  30    1123     485                                                        1350   -0.68    0.00  1.0000
   0  11 -30    1164     550                                                        1412    0.73   -0.07  1.0000
   0 -11 -30     427     375                                                         571   -0.68    0.00  1.0000
   0  11  31    2189     951                                                        2261   -0.16   -0.04  1.0000
   0  11 -31    2944    1137                                                        3013   -0.13    0.10  1.0000
   0 -11 -31    3012    1214                                                        3096   -0.16    0.04  1.0000
   0  11  32    7255    1872                                                        7609   -0.43   -0.01  1.0000
   0  11 -32    8270    1726                                                        8615    0.40   -0.01  1.0000
   0 -11 -32    8036    1694                                                        8408   -0.43    0.01  1.0000
   0  11 -33    1068     617                                                         835   -0.80    0.02  1.0000
   0 -11 -33    1900     920                                                        1583   -0.81    0.25  1.0000
   0  11  34     622     589                                                         918    1.13   -0.02  1.0000
   0  11 -34     216     402                                                         402   -1.13    0.14  1.0000
   0 -11 -34     288     349                                                         498    1.13    0.02  1.0000
   0  11  35     125     494                                                         265    1.08    0.08  1.0000
   0  11 -35     920     558                                                        1254    1.07   -0.02  1.0000
   0  12   0    3766    1211                                                        7955    5.87   -0.03  1.0000
   0  12   0    3610    1213                                                        7727    5.87   -0.03  1.0000
   0  12  -1     521     455                                                         247   -8.13    0.15  1.0000
   0  12   1     216     333                                                         582    8.19   -0.11  1.0000
   0  12  -1       0    1084                                                        1453   -8.13    0.15  1.0000
   0  12  -2   14158    2342                                                       17325   -2.67   -0.21  1.0000
   0  12   2   10768    2039                                                       13564   -2.68   -0.03  1.0000
   0  12  -2   11571    2062                                                       14450   -2.67   -0.21  1.0000
   0 -12  -4   64748    4123                                                       69343   -1.87   -0.15  1.0000
   0  12  -5    5250     892                                                        2268    5.32    0.24  1.0000
   0 -12  -5    2486     346                                                         628   -5.30    0.25  1.0000
   0  12   6    3868     977                                                        2610    2.35    0.26  1.0000
   0  12  -6    1425     417                                                         707    2.36    0.07  1.0000
   0  12  -6    2115     577                                                        1213    2.36    0.07  1.0000
   0 -12  -6    3375     691                                                        2208    2.35   -0.26  1.0000
   0  12   7    7248    1194                                                        7689   -0.54    0.31  1.0000
   0  12  -7    5564    1235                                                        5955    0.54   -0.03  1.0000
   0  12  -7    5187     883                                                        5565    0.54   -0.03  1.0000
   0 -12  -7    6469    1300                                                        6886   -0.54   -0.31  1.0000
   0  12   8    1069     367                                                         865   -0.83   -0.77  1.0000
   0  12   8      28     635                                                        -768   -0.83   -0.77  1.0000
   0  12  -8     807     364                                                         628   -0.82    0.73  1.0000
   0  12  -8      27     400                                                        -336   -0.82    0.73  1.0000
   0 -12  -8     412     333                                                         283   -0.83    0.77  1.0000
   0  12   9    2304     843                                                        4271    3.66   -0.10  1.0000
   0  12   9    3311     930                                                        5609    3.66   -0.10  1.0000
   0  12  -9    3629    1090                                                        6015   -3.65    0.21  1.0000
   0  12  -9    5283    1521                                                        8100   -3.65    0.21  1.0000
   0 -12  -9    2139     966                                                        4046    3.66    0.10  1.0000
   0  12  10   11387    1476                                                       11971    0.56    0.66  1.0000
   0  12  10   11151    2023                                                       11729    0.56    0.66  1.0000
   0  12 -10   12104    2092                                                       12701    0.56   -0.71  1.0000
   0  12 -10   12428    1470                                                       13033    0.56   -0.71  1.0000
   0 -12 -10   12132    1568                                                       12735    0.56   -0.66  1.0000
   0  12  11    3011    1029                                                        3080    0.11    0.45  1.0000
   0  12 -11    3373     971                                                        3409   -0.06   -0.12  1.0000
   0  12 -11     671     490                                                         687   -0.06   -0.12  1.0000
   0 -12 -11    1044     481                                                        1083    0.11   -0.45  1.0000
   0  12  12    2083     929                                                        2777   -1.49   -0.06  1.0000
   0  12 -12     661     849                                                        1089   -1.53   -0.34  1.0000
   0  12 -12    1354     692                                                        1944   -1.53   -0.34  1.0000
   0 -12 -12    1633     848                                                        2253   -1.49    0.06  1.0000
   0  12 -13    7474    1639                                                       10003    2.86   -0.29  1.0000
   0  12 -13    8585    2950                                                       11283    2.86   -0.29  1.0000
   0 -12 -13   11015    1589                                                       14125   -2.93    0.43  1.0000
   0  12 -14   26948    1900                                                       24696    1.48    0.39  1.0000
   0  12 -14   27715    2824                                                       25431    1.48    0.39  1.0000
   0  12 -15   56789    5465                                                       56807   -0.01    0.12  1.0000
   0  12  16    6310    3056                                                        5920   -0.53   -0.07  1.0000
   0  12 -16    2444     929                                                        2207   -0.52    0.08  1.0000
   0  12 -16    2651    1164                                                        2404   -0.52    0.08  1.0000
   0 -12 -16    2666     994                                                        2415   -0.53    0.07  1.0000
   0  12  17     352     488                                                        1116    3.09   -0.12  1.0000
   0  12  17     802     680                                                        1846    3.09   -0.12  1.0000
   0  12 -17     193     424                                                         816   -3.10    0.06  1.0000
   0  12 -17     353     711                                                        1121   -3.10    0.06  1.0000
   0 -12 -17     284     445                                                         991    3.09    0.12  1.0000
   0  12  18     149     439                                                         188    0.31    0.22  1.0000
   0  12  18    1522     775                                                        1644    0.31    0.22  1.0000
   0  12 -18     485     321                                                         546    0.28    0.09  1.0000
   0  12 -18    1280     757                                                        1379    0.28    0.09  1.0000
   0 -12 -18    1060     420                                                        1162    0.31   -0.22  1.0000
   0  12  19    3625    1288                                                        4279   -1.10    0.39  1.0000
   0  12  19    5998    1250                                                        6833   -1.10    0.39  1.0000
   0  12 -19    4734    1091                                                        5501    1.13    0.03  1.0000
   0  12 -19    4114    1181                                                        4830    1.13    0.03  1.0000
   0 -12 -19    6097    1111                                                        6939   -1.10   -0.39  1.0000
   0  12  20    4041    1000                                                        3697    0.58   -0.11  1.0000
   0  12  20    2532     711                                                        2261    0.58   -0.11  1.0000
   0  12 -20    1968     709                                                        1701    0.66   -0.13  1.0000
   0  12 -20    3226    1001                                                        2881    0.66   -0.13  1.0000
   0 -12 -20    6133     887                                                        5708    0.58    0.11  1.0000
   0  12  21     280     353                                                         465   -1.02    0.10  1.0000
   0  12  21     983     552                                                        1309   -1.02    0.10  1.0000
   0  12 -21    1418     641                                                        1803    1.01    0.09  1.0000
   0  12 -21     408     480                                                         625    1.01    0.09  1.0000
   0 -12 -21     376     428                                                         586   -1.02   -0.10  1.0000
   0  12  22    4323    1061                                                        3666   -1.10    0.10  1.0000
   0  12  22    4560    1094                                                        3885   -1.10    0.10  1.0000
   0  12 -22    6357     965                                                        5496   -1.18    0.08  1.0000
   0  12 -22    4791    1518                                                        4047   -1.18    0.08  1.0000
   0 -12 -22    5491     702                                                        4747   -1.10   -0.10  1.0000
   0  12  23    1761     908                                                        2063   -0.73   -0.11  1.0000
   0 -12 -23     786     529                                                         991   -0.73    0.11  1.0000
   0  12  24   22267    3135                                                       21124   -0.82   -0.04  1.0000
   0  12  24   20656    3089                                                       19556   -0.82   -0.04  1.0000
   0  12 -24   18542    2935                                                       17514   -0.81   -0.25  1.0000
   0 -12 -24   24452    2637                                                       23254   -0.82    0.04  1.0000
   0  12  25     419     418                                                         754    1.48   -0.05  1.0000
   0  12  25    1193     618                                                        1725    1.48   -0.05  1.0000
   0  12 -25     532     455                                                         903   -1.48   -0.02  1.0000
   0 -12 -25     258     499                                                         532    1.48    0.05  1.0000
   0  12  26   11133    2402                                                       11840    0.70   -0.10  1.0000
   0  12  26   11762    2202                                                       12488    0.70   -0.10  1.0000
   0  12 -26   18584    2900                                                       19512    0.71    0.08  1.0000
   0 -12 -26   10091    2162                                                       10765    0.70    0.10  1.0000
   0  12  27     674     611                                                         736    0.24   -0.21  1.0000
   0  12  27     182     388                                                         214    0.24   -0.21  1.0000
   0 -12 -27     620     489                                                         679    0.24    0.21  1.0000
   0  12  28     365     404                                                         695    1.53    0.03  1.0000
   0  12  28     499     350                                                         876    1.53    0.03  1.0000
   0  12 -28       6     419                                                          96    1.54    0.12  1.0000
   0 -12 -28     222     404                                                         491    1.53   -0.03  1.0000
   0  12  29    3717    1454                                                        4280   -0.94    0.15  1.0000
   0  12  29    4234    1624                                                        4834   -0.94    0.15  1.0000
   0  12 -29    5698    1361                                                        6369    0.91    0.08  1.0000
   0 -12 -29    6641    1078                                                        7387   -0.94   -0.15  1.0000
   0  12  30     684     437                                                         835   -0.58    0.05  1.0000
   0  12 -30     318     436                                                         422   -0.57   -0.05  1.0000
   0 -12 -30    1245     719                                                        1446   -0.58   -0.05  1.0000
   0  12  31    1049     705                                                         856    0.66    0.04  1.0000
   0  12  31     672     523                                                         519    0.66    0.04  1.0000
   0  12 -31       8     669                                                         -65   -0.61   -0.02  1.0000
   0 -12 -31     452     424                                                         329    0.66   -0.04  1.0000
   0  12  32    1644     721                                                        1956   -0.78    0.04  1.0000
   0  12 -32    2485    1051                                                        2866   -0.78    0.06  1.0000
   0  12  33     565     531                                                         460   -0.49    0.01  1.0000
   0  12 -33    2893    1044                                                        2654    0.48    0.09  1.0000
   0 -13  -3   55674   28545                                                       51237    2.03   -0.40  1.0000
   0  13  -4    2375     664                                                        1790    1.36   -0.34  1.0000
   0 -13  -4    2177     711                                                        1566   -1.50   -0.35  1.0000
   0  13   5    4992    1258                                                        4124    1.36   -0.03  1.0000
   0  13  -5    7545     970                                                        6625    1.18   -0.76  1.0000
   0  13  -5    6503    1253                                                        5650    1.18   -0.76  1.0000
   0 -13  -5    5442    1014                                                        4534    1.36    0.03  1.0000
   0  13   6    1397    1205                                                        3647    4.76   -1.06  1.0000
   0  13  -6      15     342                                                         700   -4.76   -0.37  1.0000
   0  13  -6     163     653                                                        1251   -4.76   -0.37  1.0000
   0 -13  -6     165     599                                                        1281    4.76    1.06  1.0000
   0  13  -7     105     692                                                         854   -3.99    0.56  1.0000
   0  13  -7     165     611                                                        1012   -3.99    0.56  1.0000
   0 -13  -7      83     552                                                         818   -4.09    0.84  1.0000
   0  13  -9   14494    2926                                                       16770    1.92    0.01  1.0000
   0  13 -10   14692    1179                                                       10040    4.43    0.02  1.0000
   0  13 -10   17301    1446                                                       12215    4.43    0.02  1.0000
   0 -13 -10   13504    1847                                                        9022   -4.48   -0.23  1.0000
   0  13 -11     304     395                                                         617    1.56   -0.21  1.0000
   0  13 -11    1403     606                                                        2014    1.56   -0.21  1.0000
   0 -13 -11     519     352                                                         914    1.54   -0.52  1.0000
   0  13  12     452     763                                                        1649    4.08   -0.14  1.0000
   0  13 -12      73     485                                                         795   -4.14   -0.29  1.0000
   0 -13 -12     129     432                                                         943    4.08    0.14  1.0000
   0  13  13    1642     718                                                        1720   -0.20   -0.02  1.0000
   0  13 -13       2     601                                                        -334   -0.17    0.22  1.0000
   0  13 -13    1077     538                                                        1132   -0.17    0.22  1.0000
   0 -13 -13    2086     682                                                        2174   -0.20    0.02  1.0000
   0  13  14    8043    1950                                                        9073   -1.18   -0.01  1.0000
   0  13 -14    9550    1784                                                       10707    1.21    0.11  1.0000
   0  13 -14   12934    1800                                                       14275    1.21    0.11  1.0000
   0  13  15   16627    3021                                                       13353   -2.83   -0.30  1.0000
   0  13 -15   17336    2172                                                       13949   -2.86   -0.10  1.0000
   0  13 -16     938     509                                                         889   -0.17   -0.07  1.0000
   0  13 -16     967     514                                                         918   -0.17   -0.07  1.0000
   0 -13 -16    2925     902                                                        2848    0.15   -0.04  1.0000
   0  13  17      51     438                                                        -765    1.50    0.19  1.0000
   0  13  17      51     609                                                        -391    1.50    0.19  1.0000
   0  13 -17    1973    1241                                                        2615    1.42    0.06  1.0000
   0  13 -17     122     414                                                         315    1.42    0.06  1.0000
   0 -13 -17      51     348                                                        -464    1.50   -0.19  1.0000
   0  13  18    1614     585                                                        1569    0.12   -0.06  1.0000
   0  13  18    3417    1044                                                        3352    0.12   -0.06  1.0000
   0  13 -18    1982     870                                                        1937   -0.11    0.07  1.0000
   0  13 -18    3072     964                                                        3016   -0.11    0.07  1.0000
   0 -13 -18    1427     899                                                        1385    0.12    0.06  1.0000
   0  13  19    5998    1219                                                        7350    1.75    0.16  1.0000
   0  13  19    6743    1618                                                        8172    1.75    0.16  1.0000
   0  13 -19    6301    5224                                                        7690    1.75    0.08  1.0000
   0  13 -19    5916    1142                                                        7264    1.75    0.08  1.0000
   0 -13 -19    6634    1393                                                        8052    1.75   -0.16  1.0000
   0  13  20     639     405                                                        1161   -1.86   -0.01  1.0000
   0  13 -20     315     404                                                         713    1.89   -0.01  1.0000
   0  13 -20     497     494                                                         976    1.89   -0.01  1.0000
   0 -13 -20    1096     667                                                        1756   -1.86    0.01  1.0000
   0  13  21     522     272                                                         287   -2.15   -0.50  1.0000
   0  13  21    1625     536                                                        1253   -2.15   -0.50  1.0000
   0  13 -21     492     301                                                         178   -2.06   -0.22  1.0000
   0  13 -21    2124     543                                                        1414   -2.06   -0.22  1.0000
   0 -13 -21     760     472                                                         487   -2.15    0.50  1.0000
   0  13  22    2108     610                                                        1098    2.70   -0.05  1.0000
   0  13  22    3586    1081                                                        2219    2.70   -0.05  1.0000
   0  13 -22    1990     486                                                        1002   -2.74   -0.03  1.0000
   0 -13 -22    1738     484                                                         836    2.70    0.05  1.0000
   0  13  23     456     412                                                         580    0.58    0.08  1.0000
   0  13  23     792     388                                                         954    0.58    0.08  1.0000
   0  13 -23     524     372                                                         647    0.54    0.02  1.0000
   0 -13 -23     934     461                                                        1109    0.58   -0.08  1.0000
   0  13  24     224     369                                                         483   -1.48    0.07  1.0000
   0  13  24     602     359                                                         994   -1.48    0.07  1.0000
   0  13 -24     220     555                                                         481    1.50    0.00  1.0000
   0 -13 -24     352     427                                                         663   -1.48   -0.07  1.0000
   0  13  25     479     460                                                         501    0.10    0.24  1.0000
   0  13  25     484     425                                                         506    0.10    0.24  1.0000
   0 -13 -25    1248     629                                                        1284    0.10   -0.24  1.0000
   0  13  26       0     270                                                         -80    0.08   -0.01  1.0000
   0  13  26       0     353                                                        -141    0.08   -0.01  1.0000
   0 -13 -26     280     290                                                         268    0.08    0.01  1.0000
   0  13  27    1057     401                                                         965    0.31    0.14  1.0000
   0  13  27       3     560                                                        -272    0.31    0.14  1.0000
   0  13 -27     868     253                                                         800    0.25    0.28  1.0000
   0 -13 -27    1181     738                                                        1084    0.31   -0.14  1.0000
   0  13  28    6129    1427                                                        5714    0.57    0.16  1.0000
   0  13  28    8076    1873                                                        7599    0.57    0.16  1.0000
   0  13 -28    8690    1499                                                        8226   -0.53    0.02  1.0000
   0  13  29    1066     859                                                        1190   -0.39   -0.19  1.0000
   0  13  29    2039     800                                                        2209   -0.39   -0.19  1.0000
   0  13 -29      46     476                                                          77   -0.42   -0.08  1.0000
   0  13  30     265     339                                                         280   -0.09   -0.14  1.0000
   0  13  30       1     498                                                         -31   -0.09   -0.14  1.0000
   0  13 -30     913     778                                                         934    0.07   -0.07  1.0000
   0  14   0   51069    5641                                                       45192    2.83    0.01  1.0000
   0  14   0   60571    3983                                                       54155    2.83    0.01  1.0000
   0  14  -1     818     934                                                        2665    4.86    0.09  1.0000
   0  14   1     634     932                                                        2314   -4.84   -0.13  1.0000
   0  14   2   10374    1680                                                        9381    1.05   -0.07  1.0000
   0  14  -2   10502    6354                                                        9458    1.10    0.12  1.0000
   0  14  -2   11272    1267                                                       10189    1.10    0.12  1.0000
   0 -14  -2    6723    1164                                                        5929    1.05    0.07  1.0000
   0  14   3    2893    1073                                                        2610   -0.57   -0.05  1.0000
   0  14  -3    6724    1198                                                        6312    0.54   -0.06  1.0000
   0  14  -3    5387    1247                                                        5019    0.54   -0.06  1.0000
   0 -14  -3    4351    1174                                                        4003   -0.57    0.05  1.0000
   0  14  -4    1579    1414                                                        3846   -4.70   -0.16  1.0000
   0  14  -4     800     991                                                        2556   -4.70   -0.16  1.0000
   0 -14  -4     122     562                                                        1091   -4.64    0.19  1.0000
   0  14   5    4364    1053                                                        5719    2.02    0.30  1.0000
   0  14  -5    5132    1163                                                        6588   -2.01    0.10  1.0000
   0  14  -5    4506    1167                                                        5876   -2.01    0.10  1.0000
   0 -14  -5    3696    1359                                                        4950    2.02   -0.30  1.0000
   0  14   6    1406     638                                                        1233    0.51    0.35  1.0000
   0  14  -6    3075     917                                                        2802    0.53   -0.10  1.0000
   0  14  -6    1686     748                                                        1485    0.53   -0.10  1.0000
   0 -14  -6    3236     930                                                        2973    0.51   -0.35  1.0000
   0  14   7    1557     599                                                        1360    0.59   -0.68  1.0000
   0  14  -7    1067     529                                                         907   -0.57   -0.62  1.0000
   0  14  -7    3280     963                                                        3002   -0.57   -0.62  1.0000
   0 -14  -7    1566     596                                                        1368    0.59    0.68  1.0000
   0  14   8    9376    3681                                                        6203    3.81   -0.03  1.0000
   0  14  -8    9137    1207                                                        6006    3.82    0.34  1.0000
   0  14  -8    9833    1585                                                        6573    3.82    0.34  1.0000
   0 -14  -8    9663    1224                                                        6437    3.81    0.03  1.0000
   0  14   9     458     527                                                         853   -1.32    1.07  1.0000
   0  14  -9     210     499                                                         511    1.29    1.21  1.0000
   0  14  -9     543     603                                                         990    1.29    1.21  1.0000
   0 -14  -9     494     406                                                         903   -1.32   -1.07  1.0000
   0  14  10    2287    1909                                                        3188   -1.82    0.05  1.0000
   0  14 -10    1974    1139                                                        2825   -1.84   -0.20  1.0000
   0  14 -10    4920    1022                                                        6221   -1.84   -0.20  1.0000
   0 -14 -10    4445    1073                                                        5672   -1.82   -0.05  1.0000
   0  14  11    4391    1232                                                        4868   -0.73   -0.57  1.0000
   0  14 -11    4923    1143                                                        5413    0.71   -0.54  1.0000
   0  14 -11    3084    1040                                                        3473    0.71   -0.54  1.0000
   0 -14 -11    4448     692                                                        4928   -0.73    0.57  1.0000
   0  14  12    1060     709                                                        1731   -1.91   -0.13  1.0000
   0  14 -12     989     561                                                        1629   -1.88    0.07  1.0000
   0  14 -12    1125     553                                                        1803   -1.88    0.07  1.0000
   0 -14 -12    1682     814                                                        2507   -1.91    0.13  1.0000
   0  14  13    3372     706                                                        2215    2.32   -0.21  1.0000
   0  14 -13    3033    1015                                                        1962   -2.28   -0.25  1.0000
   0  14 -13    4686    1024                                                        3327   -2.28   -0.25  1.0000
   0 -14 -13    4253     792                                                        2939    2.32    0.21  1.0000
   0  14  14    1636     612                                                         938    2.08   -0.24  1.0000
   0  14 -14      93     498                                                        -138    2.03    0.07  1.0000
   0  14 -14     636     308                                                         243    2.03    0.07  1.0000
   0 -14 -14     676     301                                                         261    2.08    0.24  1.0000
   0  14 -15      21     298                                                         159    1.71   -0.05  1.0000
   0  14 -15     448     455                                                         855    1.71   -0.05  1.0000
   0 -14 -15     290     363                                                         635   -1.72   -0.13  1.0000
   0  14  16    3051    1108                                                        2929    0.24    0.04  1.0000
   0  14 -16    2111     854                                                        1988    0.29   -0.26  1.0000
   0 -14 -16    3737    1010                                                        3601    0.24   -0.04  1.0000
   0  14  17    8733    2327                                                        9808    1.18    0.00  1.0000
   0  14 -17    7191    1806                                                        8168   -1.18    0.14  1.0000
   0  14 -17   13547    2034                                                       14877   -1.18    0.14  1.0000
   0 -14 -17    9031    2152                                                       10124    1.18    0.00  1.0000
   0  14  18    1468     560                                                        1266   -0.62    0.42  1.0000
   0  14 -18    1310     450                                                        1096   -0.66    0.10  1.0000
   0 -14 -18    1430     718                                                        1231   -0.62   -0.42  1.0000
   0  14  19    7103    1195                                                        6743   -0.46    0.13  1.0000
   0  14 -19    6357    1284                                                        6020    0.45    0.13  1.0000
   0  14 -19    4759    1091                                                        4468    0.45    0.13  1.0000
   0 -14 -19    5060    1211                                                        4757   -0.46   -0.13  1.0000
   0  14  20    3411    1003                                                        2975   -0.81   -0.10  1.0000
   0  14 -20    4842    1108                                                        4324   -0.81    0.13  1.0000
   0  14 -20    2904     834                                                        2506   -0.81    0.13  1.0000
   0 -14 -20    3986    1039                                                        3514   -0.81    0.10  1.0000
   0  14  21      94     602                                                        -343   -2.04    0.11  1.0000
   0  14 -21     377     382                                                         846    2.04   -0.04  1.0000
   0 -14 -21     169     530                                                         514   -2.04   -0.11  1.0000
   0  14  22    1081     668                                                        1082    0.01   -0.18  1.0000
   0  14 -22     265     338                                                         263    0.01   -0.07  1.0000
   0 -14 -22     353     299                                                         353    0.01    0.18  1.0000
   0  14  23    9647    1432                                                        7579    2.36   -0.17  1.0000
   0  14 -23    6901     885                                                        5163   -2.37    0.11  1.0000
   0  14  24    1390     744                                                         930    1.43    0.06  1.0000
   0  14 -24      47     615                                                        -168    1.45    0.00  1.0000
   0  14  25     396     557                                                         464   -0.34   -0.06  1.0000
   0  14 -25     735     440                                                         831    0.35   -0.18  1.0000
   0  14  26    2431     902                                                        2643   -0.44   -0.06  1.0000
   0  14 -26    1840     949                                                        2031   -0.46    0.02  1.0000
   0  14  27     774     483                                                         861    0.32    0.00  1.0000
   0  14  27    2313     765                                                        2462    0.32    0.00  1.0000
   0  14 -27    1278     587                                                        1387   -0.31   -0.01  1.0000
   0  15   1    1749     415                                                        1152   -1.66   -0.07  1.0000
   0  15  -1    1647     397                                                        1081   -1.63    0.13  1.0000
   0  15  -1    3108     900                                                        2309   -1.63    0.13  1.0000
   0 -15  -1     721     458                                                         360   -1.66    0.07  1.0000
   0  15   2       3     656                                                        -389   -0.34   -0.06  1.0000
   0  15  -2     295     297                                                         356    0.34    0.25  1.0000
   0 -15  -2     261     252                                                         315   -0.34    0.06  1.0000
   0  15   3      44     597                                                         -68    1.40   -0.01  1.0000
   0  15  -3     253     445                                                         512    1.40    0.21  1.0000
   0  15  -3      29     295                                                         147    1.40    0.21  1.0000
   0 -15  -3      44     397                                                        -141    1.40    0.01  1.0000
   0  15  -4     677     488                                                         818   -0.53    0.15  1.0000
   0  15   4     485     811                                                         614    0.55   -0.27  1.0000
   0  15  -4       7     478                                                        -328   -0.53    0.15  1.0000
   0 -15  -4     169     270                                                         248    0.55    0.27  1.0000
   0  15  -5    3785     902                                                        2822    1.77   -0.11  1.0000
   0  15   5    3264    1127                                                        2368    1.79   -0.25  1.0000
   0  15  -5    6085     845                                                        4845    1.77   -0.11  1.0000
   0 -15  -5    4264     936                                                        3230    1.79    0.25  1.0000
   0  15   6    2325     961                                                        1625   -1.67   -0.16  1.0000
   0  15  -6    2130     743                                                        1470    1.66   -0.39  1.0000
   0  15  -6    3106     929                                                        2298    1.66   -0.39  1.0000
   0 -15  -6    1590     519                                                        1022   -1.67    0.16  1.0000
   0  15   7    1391    1387                                                        2213   -2.06    0.23  1.0000
   0  15  -7    3505    1012                                                        4758   -2.06   -0.26  1.0000
   0  15  -7    4604    1040                                                        6026   -2.06   -0.26  1.0000
   0 -15  -7    2356    2365                                                        3398   -2.06   -0.23  1.0000
   0  15   8    5585    1615                                                        6958    1.83    0.33  1.0000
   0  15  -8    4589    1555                                                        5841   -1.83    0.01  1.0000
   0  15  -8    5848    1744                                                        7251   -1.83    0.01  1.0000
   0 -15  -8    7366    1064                                                        8931    1.83   -0.33  1.0000
   0  15   9    1950     854                                                        1865   -0.21   -0.05  1.0000
   0  15  -9     747     545                                                         698   -0.19    0.07  1.0000
   0  15  -9    1497    1014                                                        1428   -0.19    0.07  1.0000
   0 -15  -9     460     382                                                         419   -0.21    0.05  1.0000
   0  15  10     784     748                                                         904    0.43    0.18  1.0000
   0  15 -10     629     572                                                         743   -0.46    0.17  1.0000
   0  15 -10     401     510                                                         492   -0.46    0.17  1.0000
   0 -15 -10    2134    1637                                                        2329    0.43   -0.18  1.0000
   0  15  11    3175    1114                                                        3880    1.25   -0.01  1.0000
   0  15 -11    2950    2529                                                        3659    1.30    0.10  1.0000
   0  15 -11    3408    1007                                                        4167    1.30    0.10  1.0000
   0 -15 -11    4039     852                                                        4830    1.25    0.01  1.0000
   0  15  12    3387    1512                                                        4009   -1.08   -0.25  1.0000
   0  15 -12    1758     944                                                        2189    1.03   -0.09  1.0000
   0  15 -12    3795    1085                                                        4418    1.03   -0.09  1.0000
   0 -15 -12    4585    1043                                                        5305   -1.08    0.25  1.0000
   0  15 -13    7129    1613                                                        7138    0.01    0.04  1.0000
   0 -15 -13    6951     956                                                        7063    0.14   -0.24  1.0000
   0  15 -14    7097    1491                                                        8040    1.14    0.03  1.0000
   0 -15 -14   12564    1916                                                       13658   -1.01   -0.07  1.0000
   0  15  15    1052     643                                                         791   -0.91   -0.29  1.0000
   0  15 -15    2163     512                                                        1810   -0.84    0.05  1.0000
   0 -15 -15    1110     385                                                         841   -0.91    0.29  1.0000
   0  15  16    2027     949                                                        2567    1.19    0.01  1.0000
   0  15 -16     779     533                                                        1129   -1.20   -0.03  1.0000
   0 -15 -16    1234     567                                                        1662    1.19   -0.01  1.0000
   0  15  17    3761    1224                                                        3589   -0.30    0.01  1.0000
   0  15 -17    3734    1232                                                        3570   -0.29   -0.19  1.0000
   0  15 -17    3216    1056                                                        3064   -0.29   -0.19  1.0000
   0 -15 -17    2432     720                                                        2294   -0.30   -0.01  1.0000
   0  15  18    5366    1407                                                        5759    0.56   -0.13  1.0000
   0  15 -18    6866    1540                                                        7358   -0.62    0.05  1.0000
   0  15 -18    7212    1115                                                        7716   -0.62    0.05  1.0000
   0 -15 -18    7065    1373                                                        7515    0.56    0.13  1.0000
   0  15  19    8945    1490                                                        8841   -0.12    0.06  1.0000
   0  15 -19    6869    1432                                                        6780   -0.11    0.09  1.0000
   0  15 -19    5778    2593                                                        5696   -0.11    0.09  1.0000
   0 -15 -19    5890    1219                                                        5805   -0.12   -0.06  1.0000
   0  15  20   23185    2483                                                       21797   -0.98   -0.06  1.0000
   0  15 -20   17617    3740                                                       16443    0.95    0.02  1.0000
   0  15  21    4206     852                                                        5247    1.60   -0.05  1.0000
   0  15  22   13789    3360                                                       14370    0.52    0.16  1.0000
   0  15 -22   14738    2621                                                       15304   -0.49   -0.03  1.0000
   0  15  23    1075     725                                                         834   -0.83    0.07  1.0000
   0  16   0     200     692                                                        -269   -2.98   -0.22  1.0000
   0 -16   0    1442     334                                                         572   -2.98    0.22  1.0000
   0  16  -1    1316     669                                                        1256    0.18    0.08  1.0000
   0  16   1    1029     408                                                         977   -0.18   -0.15  1.0000
   0  16  -1     922     329                                                         872    0.18    0.08  1.0000
   0 -16  -1     524     390                                                         487   -0.18    0.15  1.0000
   0  16  -2    1023     620                                                        1172    0.48    0.20  1.0000
   0  16   2    1159     542                                                        1301    0.43    0.03  1.0000
   0  16  -2     970     347                                                        1116    0.48    0.20  1.0000
   0 -16  -2    1047     829                                                        1183    0.43   -0.03  1.0000
   0  16   3     177     714                                                        -456   -2.81    0.00  1.0000
   0  16  -3     177     714                                                        -329    2.81   -0.10  1.0000
   0  16  -3     177     442                                                         -25    2.81   -0.10  1.0000
   0 -16  -3     177     437                                                        -446   -2.81    0.00  1.0000
   0  16  -4    2480     761                                                        1538    2.24   -0.24  1.0000
   0  16   4    2666     874                                                        1659    2.31    0.20  1.0000
   0  16  -4    1284     477                                                         637    2.24   -0.24  1.0000
   0 -16  -4     309     309                                                          44    2.31   -0.20  1.0000
   0  16   5      87     538                                                         367    2.07    0.30  1.0000
   0  16  -5     281     589                                                         708   -2.08    0.07  1.0000
   0  16  -5     948     703                                                        1651   -2.08    0.07  1.0000
   0 -16  -5      72     259                                                           2    2.07   -0.30  1.0000
   0  16   6    1656     844                                                        2117   -1.12   -0.26  1.0000
   0  16  -6    1326     464                                                        1718   -1.05    0.37  1.0000
   0  16  -6    1452     699                                                        1861   -1.05    0.37  1.0000
   0 -16  -6     745     319                                                        1063   -1.12    0.26  1.0000
   0  16   7    1292     939                                                        1955    1.75   -0.14  1.0000
   0  16  -7     323     605                                                         685   -1.73   -0.09  1.0000
   0  16  -7     716     371                                                        1223   -1.73   -0.09  1.0000
   0 -16  -7    1090     605                                                        1705    1.75    0.14  1.0000
   0  16   8      12     680                                                         -32   -0.47    0.56  1.0000
   0  16  -8      13     657                                                         -34   -0.50   -0.58  1.0000
   0  16  -8      46     419                                                          93   -0.50   -0.58  1.0000
   0 -16  -8     218     312                                                         309   -0.47   -0.56  1.0000
   0  16   9     284     502                                                         660   -1.86   -0.08  1.0000
   0  16  -9     452     469                                                         909    1.87    0.16  1.0000
   0  16  -9     736     648                                                        1298    1.87    0.16  1.0000
   0 -16  -9     162     358                                                         464   -1.86    0.08  1.0000
   0  16  10    3336    1244                                                        3432    0.15   -0.63  1.0000
   0  16 -10    5655    1117                                                        5798    0.19    0.47  1.0000
   0  16 -10    2614    1205                                                        2710    0.19    0.47  1.0000
   0 -16 -10    3782    1204                                                        3885    0.15    0.63  1.0000
   0  16  11    1317     798                                                        1591   -0.76   -0.02  1.0000
   0  16 -11    2857    1315                                                        3258    0.76   -0.10  1.0000
   0  16 -11     977     810                                                        1217    0.76   -0.10  1.0000
   0 -16 -11    1065     466                                                        1313   -0.76    0.02  1.0000
   0  16  12    1190     722                                                        1339    0.44    0.11  1.0000
   0  16 -12     223     488                                                         276    0.35    0.06  1.0000
   0  16 -12     960     600                                                        1066    0.35    0.06  1.0000
   0 -16 -12     415     395                                                         505    0.44   -0.11  1.0000
   0  16  13    2671     962                                                        3330    1.27   -0.06  1.0000
   0  16 -13    4064    1583                                                        4878   -1.29    0.00  1.0000
   0  16 -13    3380    1181                                                        4125   -1.29    0.00  1.0000
   0 -16 -13    5067     961                                                        5961    1.27    0.06  1.0000
   0  16  14    4823    3253                                                        4779   -0.07    0.05  1.0000
   0  16 -14       7     459                                                           7   -0.01   -0.14  1.0000
   0  16 -14     485     386                                                         484   -0.01   -0.14  1.0000
   0 -16 -14     469     408                                                         455   -0.07   -0.05  1.0000
   0  16  15     591     576                                                         466   -0.58    0.03  1.0000
   0  16 -15       7     689                                                        -230    0.55    0.06  1.0000
   0  16 -15    1087     428                                                         921    0.55    0.06  1.0000
   0 -16 -15    1579     780                                                        1370   -0.58   -0.03  1.0000
   0  16  16    1056     655                                                         980   -0.25    0.09  1.0000
   0  16 -16    1695    1191                                                        1596   -0.26   -0.05  1.0000
   0  16 -16    3088     761                                                        2954   -0.26   -0.05  1.0000
   0 -16 -16     739     504                                                         676   -0.25   -0.09  1.0000
   0  16  17       6     698                                                        -152    0.49    0.17  1.0000
   0  16 -17     838     622                                                         975   -0.48   -0.05  1.0000
   0  16 -17    1462     679                                                        1642   -0.48   -0.05  1.0000
   0  16  18    9987    1703                                                        9972   -0.02    0.07  1.0000
   0  16 -18    9063    2407                                                        9066    0.00   -0.06  1.0000
   0  16 -18   11864    2216                                                       11868    0.00   -0.06  1.0000
   0  17  -1    2686    1038                                                        2360   -0.68   -0.08  1.0000
   0  17   1    2393     915                                                        2093   -0.67   -0.04  1.0000
   0 -17   1    2956     776                                                        2614   -0.68    0.08  1.0000
   0 -17  -1    3510    1004                                                        3144   -0.67    0.04  1.0000
   0  17   2    1151     621                                                        1355    0.61   -0.07  1.0000
   0  17  -2    1338     761                                                        1560   -0.62   -0.02  1.0000
   0  17  -2     791     375                                                         964   -0.62   -0.02  1.0000
   0 -17  -2     616     476                                                         768    0.61    0.07  1.0000
   0  17   3      38     344                                                        -223    1.30   -0.07  1.0000
   0  17  -3     209     517                                                         424    1.29    0.13  1.0000
   0 -17  -3     143     277                                                         329    1.30    0.07  1.0000
   0  17   4    1586     704                                                        1557   -0.08    0.05  1.0000
   0  17  -4     664     416                                                         650    0.06    0.07  1.0000
   0  17  -4     692     428                                                         678    0.06    0.07  1.0000
   0 -17  -4     790     527                                                         770   -0.08   -0.05  1.0000
   0  17   5     708     362                                                         985   -1.01   -0.01  1.0000
   0  17  -5    2304     870                                                        2788   -1.01    0.02  1.0000
   0  17  -5    2110     781                                                        2574   -1.01    0.02  1.0000
   0 -17  -5    2404     990                                                        2895   -1.01    0.01  1.0000
   0  17   6    2969    1112                                                        2824   -0.28   -0.06  1.0000
   0  17  -6    1023     733                                                         939    0.28    0.05  1.0000
   0  17  -6    1884     700                                                        1770    0.28    0.05  1.0000
   0 -17  -6    3481     943                                                        3324   -0.28    0.06  1.0000
   0  17   7    2859     859                                                        2507    0.72    0.12  1.0000
   0  17  -7    5967    1779                                                        5442    0.73    0.07  1.0000
   0  17  -7    4583    1512                                                        4125    0.73    0.07  1.0000
   0 -17  -7    5491    1185                                                        4998    0.72   -0.12  1.0000
   0  17   8     950     710                                                        1011    0.21    0.00  1.0000
   0  17  -8     919     587                                                         973   -0.18    0.03  1.0000
   0  17  -8     487     498                                                         526   -0.18    0.03  1.0000
   0 -17  -8    2127     744                                                        2218    0.21    0.00  1.0000
   0  17   9    2824    1028                                                        2817    0.01   -0.04  1.0000
   0  17  -9     208     597                                                         204    0.03   -0.15  1.0000
   0  17  -9    1056     468                                                        1048    0.03   -0.15  1.0000
   0 -17  -9     752     564                                                         748    0.01    0.04  1.0000
   0  17  10     219     480                                                         185   -0.27    0.12  1.0000
   0  17 -10    1212     549                                                        1135    0.26   -0.14  1.0000
   0 -17 -10    1494     862                                                        1404   -0.27   -0.12  1.0000
   0  17  11    1079     654                                                        1398   -0.96    0.02  1.0000
   0  17 -11    1874    1041                                                        2271   -0.92    0.02  1.0000
   0  17 -11    2146    1592                                                        2569   -0.92    0.02  1.0000
   0 -17 -11    1716    1249                                                        2113   -0.96   -0.02  1.0000
  -1   0  46    1350     808                                                        1721    1.00    0.06  1.0000
   1   0 -46     584     640                                                         836    1.00   -0.06  1.0000
  -1   0  44     860     728                                                        1084   -0.76   -0.03  1.0000
   1   0 -44     810     479                                                        1028   -0.76    0.03  1.0000
  -1   0  42     658     481                                                         780   -0.48    0.05  1.0000
   1   0 -42     261     478                                                         340   -0.48   -0.05  1.0000
  -1   0  40     209     269                                                         291    0.55   -0.07  1.0000
   1   0 -40    1158     605                                                        1342    0.55    0.07  1.0000
  -1   0  38   15752    2888                                                       15127    0.53   -0.06  1.0000
   1   0 -38   16224    8902                                                       15590    0.53    0.06  1.0000
  -1   0  36    1493     608                                                        1610   -0.31    0.16  1.0000
   1   0 -36    2115     644                                                        2254   -0.31   -0.16  1.0000
  -1   0  34    3141     892                                                        2372   -1.55   -0.14  1.0000
   1   0 -34    2088     593                                                        1471   -1.55    0.14  1.0000
  -1   0  32   21721    2230                                                       17739    3.00    0.10  1.0000
   1   0 -32   24758    2027                                                       20493    3.00   -0.10  1.0000
  -1   0  30   12652    1821                                                       14715   -1.86    0.01  1.0000
   1   0 -30   13566    2662                                                       15699   -1.86   -0.01  1.0000
  -1   0  28  126991    5015                                                      117408   -2.89   -0.09  1.0000
   1   0 -28  122144    4300                                                      112749   -2.89    0.09  1.0000
  -1   0  26   62911    4206                                                       68075    2.13    0.09  1.0000
   1   0 -26   51179    2981                                                       55847    2.13   -0.09  1.0000
   1   0 -26   58614    3845                                                       63602    2.13   -0.09  1.0000
  -1   0  24  603687  314501                                                      656792    7.06   -0.07  1.0000
  -1   0  22   58155    3745                                                       68164   -4.21   -0.08  1.0000
  -1   0  22   51675    3167                                                       61133   -4.21   -0.08  1.0000
   1   0 -22   57803    3933                                                       67783   -4.21    0.08  1.0000
  -1   0  20    9257     838                                                        3371   -8.05    0.08  1.0000
  -1   0  20    6948     662                                                        2043   -8.05    0.08  1.0000
   1   0 -20    6924     711                                                        2030   -8.05   -0.08  1.0000
  -1   0  18  158683    6853                                                      154107   -1.22    0.11  1.0000
  -1   0  18  136861    5381                                                      132614   -1.22    0.11  1.0000
   1   0 -18  149988    6475                                                      145540   -1.22   -0.11  1.0000
  -1   0  16    6428    3019                                                       37878   24.16    0.06  1.0000
  -1   0  16    7688    2325                                                       40858   24.16    0.06  1.0000
   1   0 -16    9688    2625                                                       45316   24.16   -0.06  1.0000
  -1   0  14    4629    2653                                                       33184  -24.09   -0.20  1.0000
  -1   0  14    5282    2806                                                       34896  -24.09   -0.20  1.0000
   1   0 -14    5410    2830                                                       35225  -24.09    0.20  1.0000
  -1   0  12  129665    5257                                                      124545    1.52   -0.08  1.0000
  -1   0  12  123376    4956                                                      118383    1.52   -0.08  1.0000
   1   0 -12  132060   45174                                                      126892    1.52    0.08  1.0000
  -1   0  10  277001    5936                                                      259944    3.47    0.08  1.0000
  -1   0  10  257309    5298                                                      240879    3.47    0.08  1.0000
   1   0 -10  253709   84486                                                      237396    3.47   -0.08  1.0000
  -1   0   8  125988    2997                                                       62530   22.14    0.01  1.0000
  -1   0   8  118699   20441                                                       57427   22.14    0.01  1.0000
   1   0  -8  115867    3123                                                       55462   22.14   -0.01  1.0000
  -1   0   6   76035    1502                                                       13968  -33.27    0.20  1.0000
  -1   0   6   74047    1426                                                       13123  -33.27    0.20  1.0000
   1   0  -6   70786    4205                                                       11771  -33.27   -0.20  1.0000
  -1   0   4    4703    2062                                                       10943    7.61   -0.10  1.0000
  -1   0   4    3860    1806                                                        9636    7.61   -0.10  1.0000
   1   0  -4    3953    1835                                                        9783    7.61    0.10  1.0000
  -1   0  -4  724314    5623                                                      256144  -72.81    0.07  1.0000
   1   0   6  176444    2888                                                       60540   36.73   -0.14  1.0000
  -1   0  -6  178988    2917                                                       62034   36.73    0.14  1.0000
   1   0  10   39803    2794                                                       47206   -3.75    0.04  1.0000
   1   0  10   38665    2544                                                       45966   -3.75    0.04  1.0000
  -1   0 -10   38644    2617                                                       45943   -3.75   -0.04  1.0000
   1   0  12  541499    8917                                                      711176   22.68    0.01  1.0000
  -1   0 -12  519774    8566                                                      686246   22.68   -0.01  1.0000
   1   0  14   48397    2613                                                       30060   -9.84    0.18  1.0000
   1   0  14   42199    8977                                                       25220   -9.84    0.18  1.0000
  -1   0 -14   45621    2339                                                       27881   -9.84   -0.18  1.0000
   1   0  16   37579    2143                                                       17494  -13.00   -0.21  1.0000
   1   0  16   33299    1537                                                       14615  -13.00   -0.21  1.0000
  -1   0 -16   35024    1728                                                       15765  -13.00    0.21  1.0000
   1   0  18  161995    5328                                                      127604    9.56    0.09  1.0000
  -1   0 -18  164014    5501                                                      129397    9.56   -0.09  1.0000
   1   0  20  123261    5146                                                      100050    7.34   -0.12  1.0000
  -1   0 -20  120802    5128                                                       97836    7.34    0.12  1.0000
   1   0  22    2499    1102                                                        6475   -6.43    0.07  1.0000
  -1   0 -22    1335     923                                                        4491   -6.43   -0.07  1.0000
  -1   0 -22    2344    1089                                                        6223   -6.43   -0.07  1.0000
   1   0  24   26103    2720                                                       32613   -4.02    0.01  1.0000
  -1   0 -24   19884    1931                                                       25612   -4.02   -0.01  1.0000
  -1   0 -24   27619    2894                                                       34305   -4.02   -0.01  1.0000
   1   0  26    1974    1348                                                        2805    1.80   -0.01  1.0000
  -1   0 -26    2333     630                                                        3231    1.80    0.01  1.0000
   1   0  28   30765    2584                                                       38662    4.48    0.00  1.0000
  -1   0 -28   29243    3387                                                       36953    4.48    0.00  1.0000
   1   0  30    1996     994                                                        3295   -2.69    0.06  1.0000
  -1   0 -30    1190     840                                                        2230   -2.69   -0.06  1.0000
   1   0  32     710     460                                                        1023   -1.13   -0.03  1.0000
  -1   0 -32     166     274                                                         332   -1.13    0.03  1.0000
   1   0  34   16198    1925                                                       14291    1.63   -0.07  1.0000
  -1   0 -34   16199    2001                                                       14292    1.63    0.07  1.0000
   1   0  36   39317    3589                                                       39159    0.08   -0.01  1.0000
  -1   0 -36   39405   25929                                                       39246    0.08    0.01  1.0000
   1   0  38    1104     932                                                        1383   -0.84    0.01  1.0000
  -1   0 -38    1144     500                                                        1428   -0.84   -0.01  1.0000
   1   0  40       5     584                                                        -162   -0.44    0.10  1.0000
  -1   0 -40     852     393                                                         736   -0.44   -0.10  1.0000
   1   0  42    2611    1042                                                        3254    1.25   -0.05  1.0000
  -1   0 -42    1390     646                                                        1869    1.25    0.05  1.0000
   1   0  44     349     450                                                         494   -0.75   -0.01  1.0000
  -1   0 -44     389     489                                                         542   -0.75    0.01  1.0000
  -1   1  46     577     424                                                         577    0.01   -0.09  1.0000
  -1  -1  46     714     336                                                         716   -0.01   -0.13  1.0000
   1   1 -46       0     544                                                        -263   -0.01    0.13  1.0000
   1  -1 -46       0     542                                                        -111    0.01    0.09  1.0000
  -1  -1  45     795     462                                                        1048    0.88    0.01  1.0000
  -1   1  45     106     402                                                         209    0.87   -0.02  1.0000
   1   1 -45    1300     979                                                        1618    0.88   -0.01  1.0000
   1  -1 -45      60     407                                                         141    0.87    0.02  1.0000
  -1  -1  44     388     494                                                         498   -0.55   -0.10  1.0000
  -1   1  44      98     456                                                         160    0.58    0.07  1.0000
   1   1 -44     512     461                                                         638   -0.55    0.10  1.0000
   1  -1 -44      80     359                                                         137    0.58   -0.07  1.0000
  -1  -1  43    1105     460                                                        1331   -0.68    0.05  1.0000
  -1   1  43     487     485                                                         637   -0.65   -0.25  1.0000
   1   1 -43       0     590                                                          14   -0.68   -0.05  1.0000
   1  -1 -43    1362     614                                                        1607   -0.65    0.25  1.0000
  -1  -1  42    2303     855                                                        2145    0.35   -0.10  1.0000
  -1   1  42    1982     653                                                        1831   -0.38   -0.42  1.0000
   1   1 -42    2940     938                                                        2761    0.35    0.10  1.0000
   1  -1 -42    2968     940                                                        2783   -0.38    0.42  1.0000
  -1  -1  41    1205     618                                                        1166   -0.12    0.12  1.0000
  -1   1  41     546     380                                                         509   -0.17    0.00  1.0000
   1   1 -41    1158     508                                                        1120   -0.12   -0.12  1.0000
   1  -1 -41     806     417                                                         761   -0.17    0.00  1.0000
  -1  -1  40     148     336                                                         226   -0.37    0.54  1.0000
  -1   1  40     717     690                                                         914    0.38    0.68  1.0000
   1   1 -40     906     620                                                        1089   -0.37   -0.54  1.0000
   1  -1 -40     788     552                                                         995    0.38   -0.68  1.0000
  -1  -1  39    2244     930                                                        2609   -0.78   -0.33  1.0000
  -1   1  39    1402     622                                                        1681   -0.75    0.36  1.0000
   1   1 -39     720     647                                                         931   -0.78    0.33  1.0000
   1  -1 -39    2621    1268                                                        2999   -0.75   -0.36  1.0000
  -1  -1  38     208     343                                                         468    1.50   -0.39  1.0000
  -1   1  38     213     363                                                         475   -1.51   -0.31  1.0000
   1   1 -38      54     555                                                         -41    1.50    0.39  1.0000
   1  -1 -38     265     387                                                         551   -1.51    0.31  1.0000
  -1  -1  37     715     409                                                         471    1.07    0.27  1.0000
  -1   1  37     846     295                                                         581    1.05   -0.11  1.0000
   1   1 -37    1162     435                                                         845    1.07   -0.27  1.0000
   1  -1 -37      25     441                                                        -162    1.05    0.11  1.0000
  -1  -1  36    2612     814                                                        2407    0.43    0.08  1.0000
  -1   1  36    1755     705                                                        1590   -0.43   -0.06  1.0000
   1   1 -36    1916     553                                                        1741    0.43   -0.08  1.0000
   1  -1 -36    2144     588                                                        1961   -0.43    0.06  1.0000
  -1  -1  35    1495     542                                                        1727    0.61    0.00  1.0000
  -1   1  35    2115    1563                                                        2380    0.59    0.00  1.0000
   1   1 -35    1939     671                                                        2203    0.61    0.00  1.0000
   1  -1 -35    3099    1113                                                        3418    0.59    0.00  1.0000
  -1  -1  34    6132    1502                                                        7529   -1.79   -0.09  1.0000
  -1   1  34    6276    1457                                                        7700    1.80    0.08  1.0000
   1   1 -34    6678    1161                                                        8133   -1.79    0.09  1.0000
   1  -1 -34    5233    1262                                                        6540    1.80   -0.08  1.0000
  -1  -1  33    6248    1600                                                        7034    1.02   -0.14  1.0000
  -1   1  33    5557    1132                                                        6350    1.08   -0.27  1.0000
   1   1 -33    4733    1017                                                        5420    1.02    0.14  1.0000
   1  -1 -33    3970     983                                                        4645    1.08    0.27  1.0000
  -1  -1  32   14506    1668                                                       12709   -1.63    0.09  1.0000
  -1   1  32   11724    1422                                                       10141    1.60   -0.05  1.0000
   1   1 -32   11783    1672                                                       10170   -1.63   -0.09  1.0000
   1  -1 -32   10447    1292                                                        8956    1.60    0.05  1.0000
  -1  -1  31   17724    2950                                                       21012   -2.50   -0.04  1.0000
  -1   1  31   18160    2343                                                       21532   -2.53    0.24  1.0000
   1   1 -31   16812    2795                                                       20018   -2.50    0.04  1.0000
   1  -1 -31   17512    2579                                                       20825   -2.53   -0.24  1.0000
  -1  -1  30    9261    1308                                                       10114    0.91   -0.03  1.0000
  -1   1  30   14672    2021                                                       15759   -0.93   -0.02  1.0000
   1   1 -30   12156    2053                                                       13131    0.91    0.03  1.0000
   1  -1 -30   15077    1803                                                       16178   -0.93    0.02  1.0000
  -1  -1  29   74588    4452                                                       78270   -1.41    0.20  1.0000
  -1   1  29   73821    4135                                                       77497   -1.41   -0.08  1.0000
   1   1 -29   74245    4607                                                       77919   -1.41   -0.20  1.0000
   1  -1 -29   77750    4707                                                       81521   -1.41    0.08  1.0000
  -1  -1  28    6649    1111                                                        4641    2.83   -0.04  1.0000
  -1   1  28    7595    1023                                                        5451   -2.81    0.03  1.0000
   1   1 -28    3086     576                                                        1775    2.83    0.04  1.0000
   1  -1 -28    5035     873                                                        3322   -2.81   -0.03  1.0000
  -1  -1  27    7713    1170                                                        6336    1.74   -0.06  1.0000
  -1   1  27    8467    1233                                                        7037    1.72    0.10  1.0000
   1   1 -27    7803    1194                                                        6417    1.74    0.06  1.0000
   1  -1 -27   11405    1273                                                        9735    1.72   -0.10  1.0000
  -1  -1  26  264362    8688                                                      267595   -0.66    0.09  1.0000
   1  -1 -26  248380    6742                                                      251625    0.68   -0.05  1.0000
  -1  -1  25   11903    3573                                                       15234    3.02    0.01  1.0000
  -1   1  25   15456    2302                                                       19255    3.05   -0.12  1.0000
   1   1 -25    9235    1399                                                       12193    3.02   -0.01  1.0000
   1   1 -25   11431    3105                                                       14699    3.02   -0.01  1.0000
   1  -1 -25   13388    2497                                                       16938    3.05    0.12  1.0000
  -1  -1  24   85051    4649                                                       97397   -4.32   -0.01  1.0000
   1   1 -24   81083    4433                                                       93148   -4.32    0.01  1.0000
   1   1 -24   93500    5157                                                      106425   -4.32    0.01  1.0000
   1  -1 -24   89099    5164                                                      101652    4.29   -0.01  1.0000
  -1  -1  23    3374     477                                                        1080   -5.35   -0.13  1.0000
  -1   1  23    2403     274                                                         566   -5.35    0.14  1.0000
   1   1 -23     881     147                                                          19   -5.35    0.13  1.0000
   1   1 -23    2767     445                                                         749   -5.35    0.13  1.0000
   1  -1 -23    1887     315                                                         331   -5.35   -0.14  1.0000
  -1  -1  22   11336    2139                                                       21864    8.74    0.10  1.0000
  -1   1  22   10604    2182                                                       20797   -8.70    0.05  1.0000
  -1   1  22   11281    2162                                                       21741   -8.70    0.05  1.0000
   1   1 -22    9970    1902                                                       19951    8.74   -0.10  1.0000
[truncated: 7,415,112 more chars]
